# Supplementary material for: New methodology of nucleophilic substitution at three different centers of a seleniranium intermediate in reactions of 2-bromomethyl-1,3-thiaselenole with mercapto benzazoles
Source: Royal Society of Chemistry journal article supplement (doi:10.1039/c9nj02505g), 2019-01-01
Supplement: c9nj02505g1.pdf [file c9nj02505g1.pdf]

*Electronic Supplementary Information (ESI)*

**New methodology of nucleophilic substitution at three different centers of seleniranium intermediate in reactions of 2-bromomethyl-1,3-thiaselenole with mercapto benzazoles**

Svetlana V. Amosova,\*Andrey S. Filippov, Nataliya A. Makhaeva, Alexander I. Albanov, Vladimir A. Potapov

*A. E. Favorsky Irkutsk Institute of Chemistry, Siberian Division of the Russian Academy of Sciences, 1 Favorsky Str., 664033 Irkutsk, Russian Federation. Fax: +7 3952 419346; Tel: +7 3952 424954; E-mail: amosova@irioch.irk.ru*

**NMR Spectra of all the synthesised compounds**

Starting 2-bromomethyl-1,3-thiaselenole (**1**) was prepared from SeBr<sub>2</sub> and divinyl sulfide according to the previously described procedure. [S. V. Amosova, I. A. Novokshonova, M. V. Penzik, A. S. Filippov, A. I. Albanov and V. A. Potapov, Tetrahedron Lett., 2017, 58, 4381.]

**2-Bromomethyl-1,3-thiaselenole (1).** Modified procedure for the synthesis 2-bromomethyl-1,3-thiaselenole **1**. A solution of bromine (5.85 g, 36.63 mmol) in CCl<sub>4</sub> (30 mL) was added dropwise to powdered selenium (2.89 g, 36.63 mmol, carefully ground) in CCl<sub>4</sub> (70 mL) over 15-20 min under an Ar atmosphere and the mixture stirred for 2 h. The formed solution of SeBr<sub>2</sub> in CCl<sub>4</sub> (100 mL) and divinyl sulfide (3.15 g, 36.63 mmol) in CCl<sub>4</sub> (10 mL) were simultaneously added dropwise over 1 h to a flask containing CCl<sub>4</sub> (15-20 mL) so that the molar ratio of both reagents in the mixture was 1:1. The reaction mixture was stirred for 3 h, then a solution of pyridine (3.47 g, 43.92 mmol) in CCl<sub>4</sub> (10 mL) was added over 10-15 min, and the mixture stirred overnight. The reaction mixture was filtered, and the solution stirred for 24 h and filtered again. Most of the solvent was removed by rotary evaporation. The residue (25-30 mL) was allowed to stand for 1 h and filtered. The solvent and the remaining pyridine were removed from the filtrate *in vacuo* to give high purity thiaselenole **1** (6.35 g, brown oil) in 71% yield.

<sup>1</sup>H NMR (400 MHz, CDCl<sub>3</sub>): δ = 6.64 (d, 1H, <sup>3</sup>J<sub>H,H</sub> = 6.3 Hz, <sup>2</sup>J<sub>Se,H</sub> = 49.3 Hz, <sup>3</sup>J<sub>Se,H</sub> = 21.0 Hz, SeCH=HCS), 6.42 (d, 1H, <sup>3</sup>J<sub>H,H</sub> = 6.3 Hz, SeCH=HCS), 5.07 (dd, 1H, <sup>3</sup>J<sub>H,H</sub> = 7.3 Hz, <sup>3</sup>J<sub>H,H</sub> = 8.2 Hz, <sup>2</sup>J<sub>Se,H</sub> = 24.0 Hz, SCHSe), 3.64 (dd, 1H, <sup>2</sup>J<sub>H,H</sub> = 10.0 Hz, <sup>3</sup>J<sub>H,H</sub> = 8.2 Hz, CH<sub>2</sub>Br), 3.57 (dd, 1H, <sup>2</sup>J<sub>H,H</sub> = 10.0 Hz, <sup>3</sup>J<sub>H,H</sub> = 7.3 Hz, CH<sub>2</sub>Br); <sup>13</sup>C NMR (100 MHz, CDCl<sub>3</sub>): δ = 119.59 (SeCH=HCS), 113.46 (<sup>1</sup>J<sub>Se,C</sub> = 106.6 Hz, SeCH=HCS), 47.65 (<sup>1</sup>J<sub>Se,C</sub> = 71.3 Hz, SCHSe), 37.51 (CH<sub>2</sub>Br); <sup>77</sup>Se NMR (76 MHz, CDCl<sub>3</sub>): δ = 521.57; MS (EI): m/z (%) = 244 (21, M<sup>+</sup>), 151 (74), 84 (99), 58 (87), 49 (100); Anal. Calcd for C<sub>4</sub>H<sub>5</sub>BrSSe: C, 19.69; H, 2.07; Br, 32.75; S, 13.14; Se, 32.36. Found: C, 19.43; H, 2.18; Br, 32.64; S, 13.44; Se, 32.21.

<sup>1</sup>H

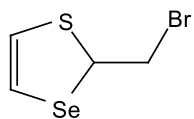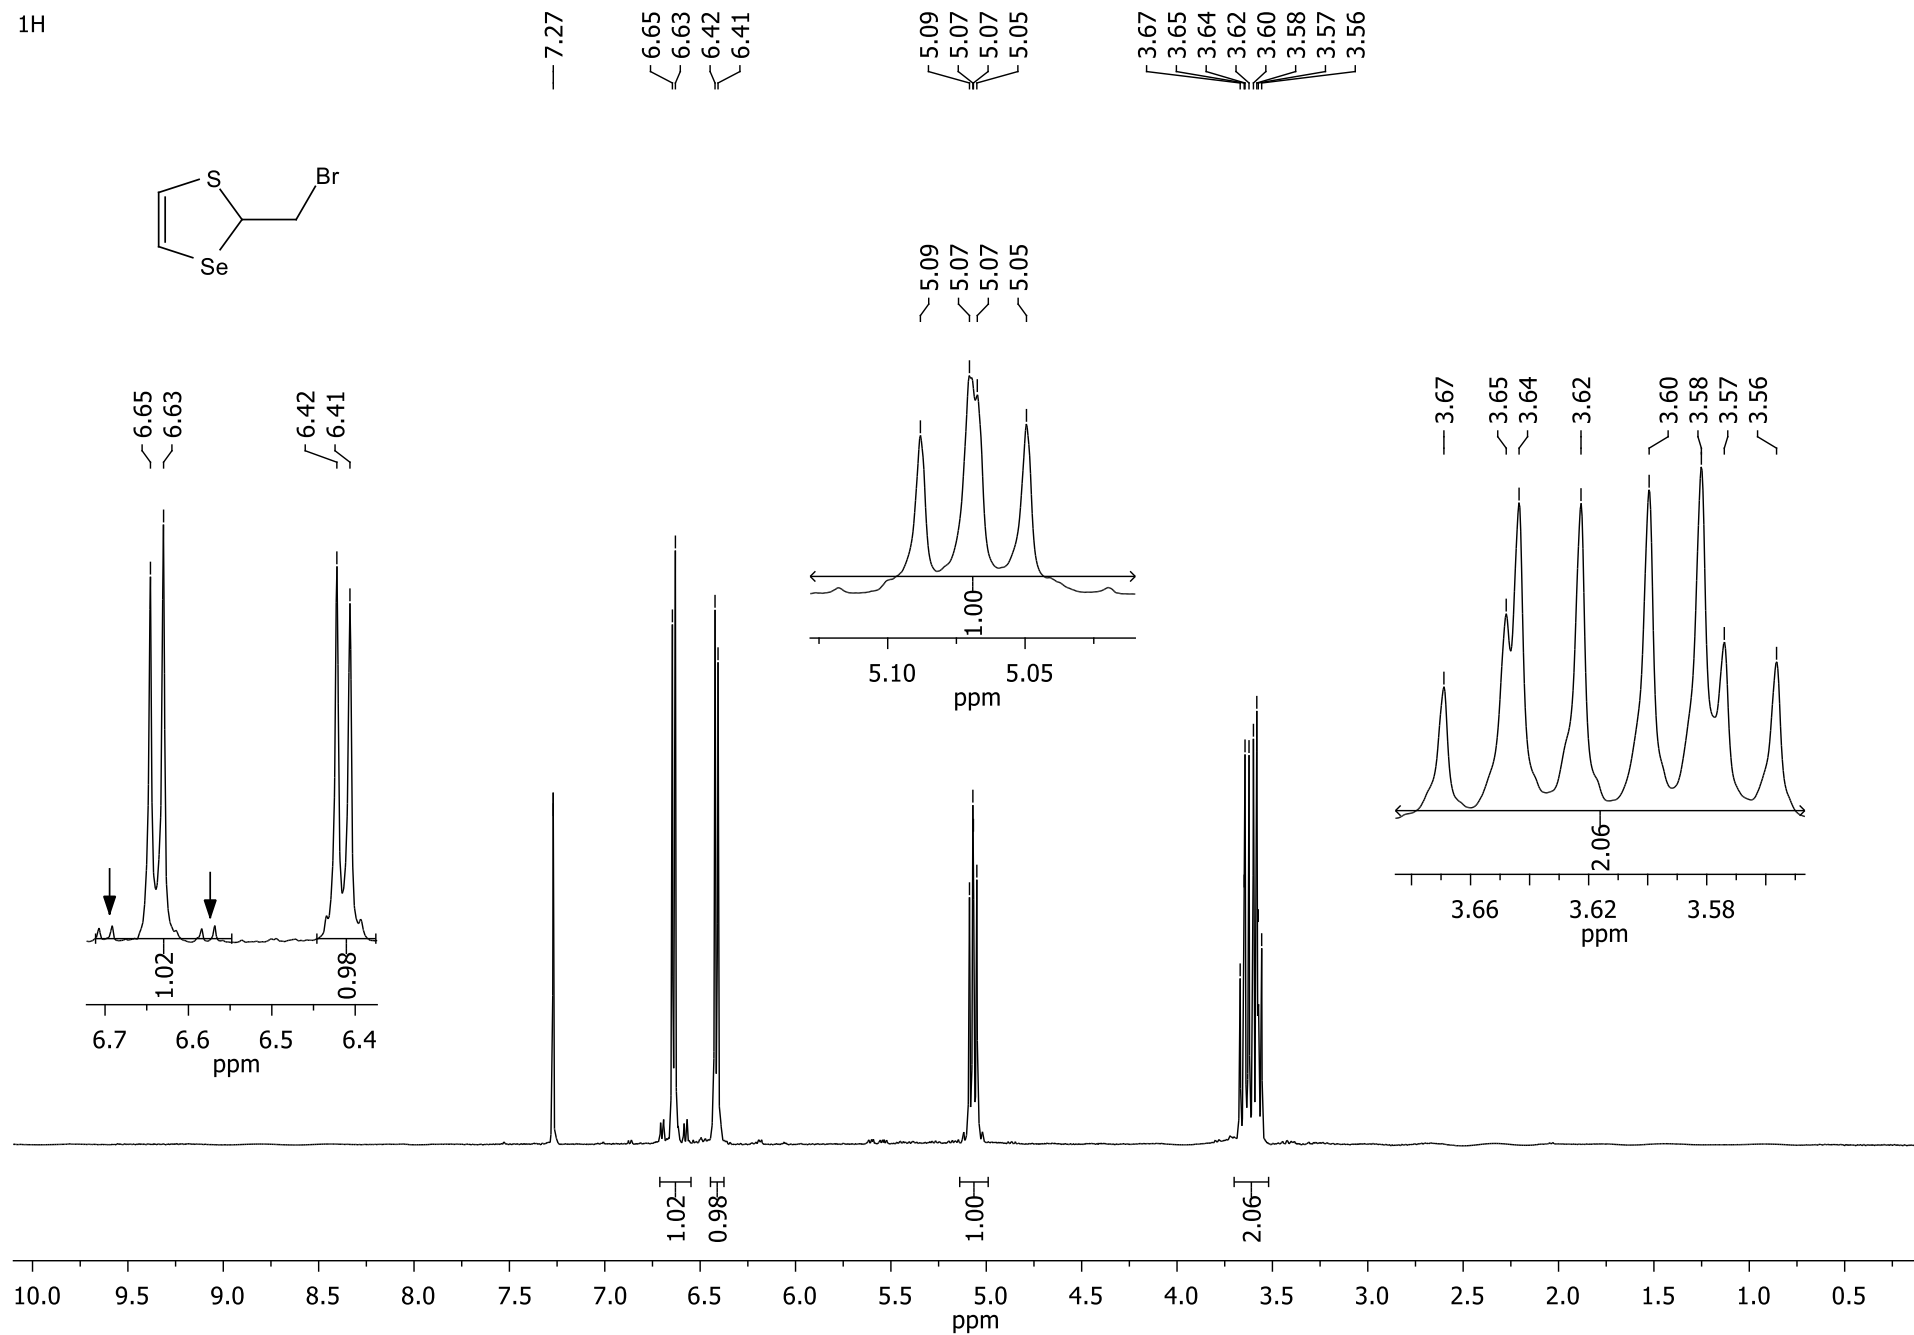

<sup>1</sup>H NMR spectrum of 2-bromomethyl-1,3-thiaselenole (1)

13C

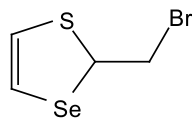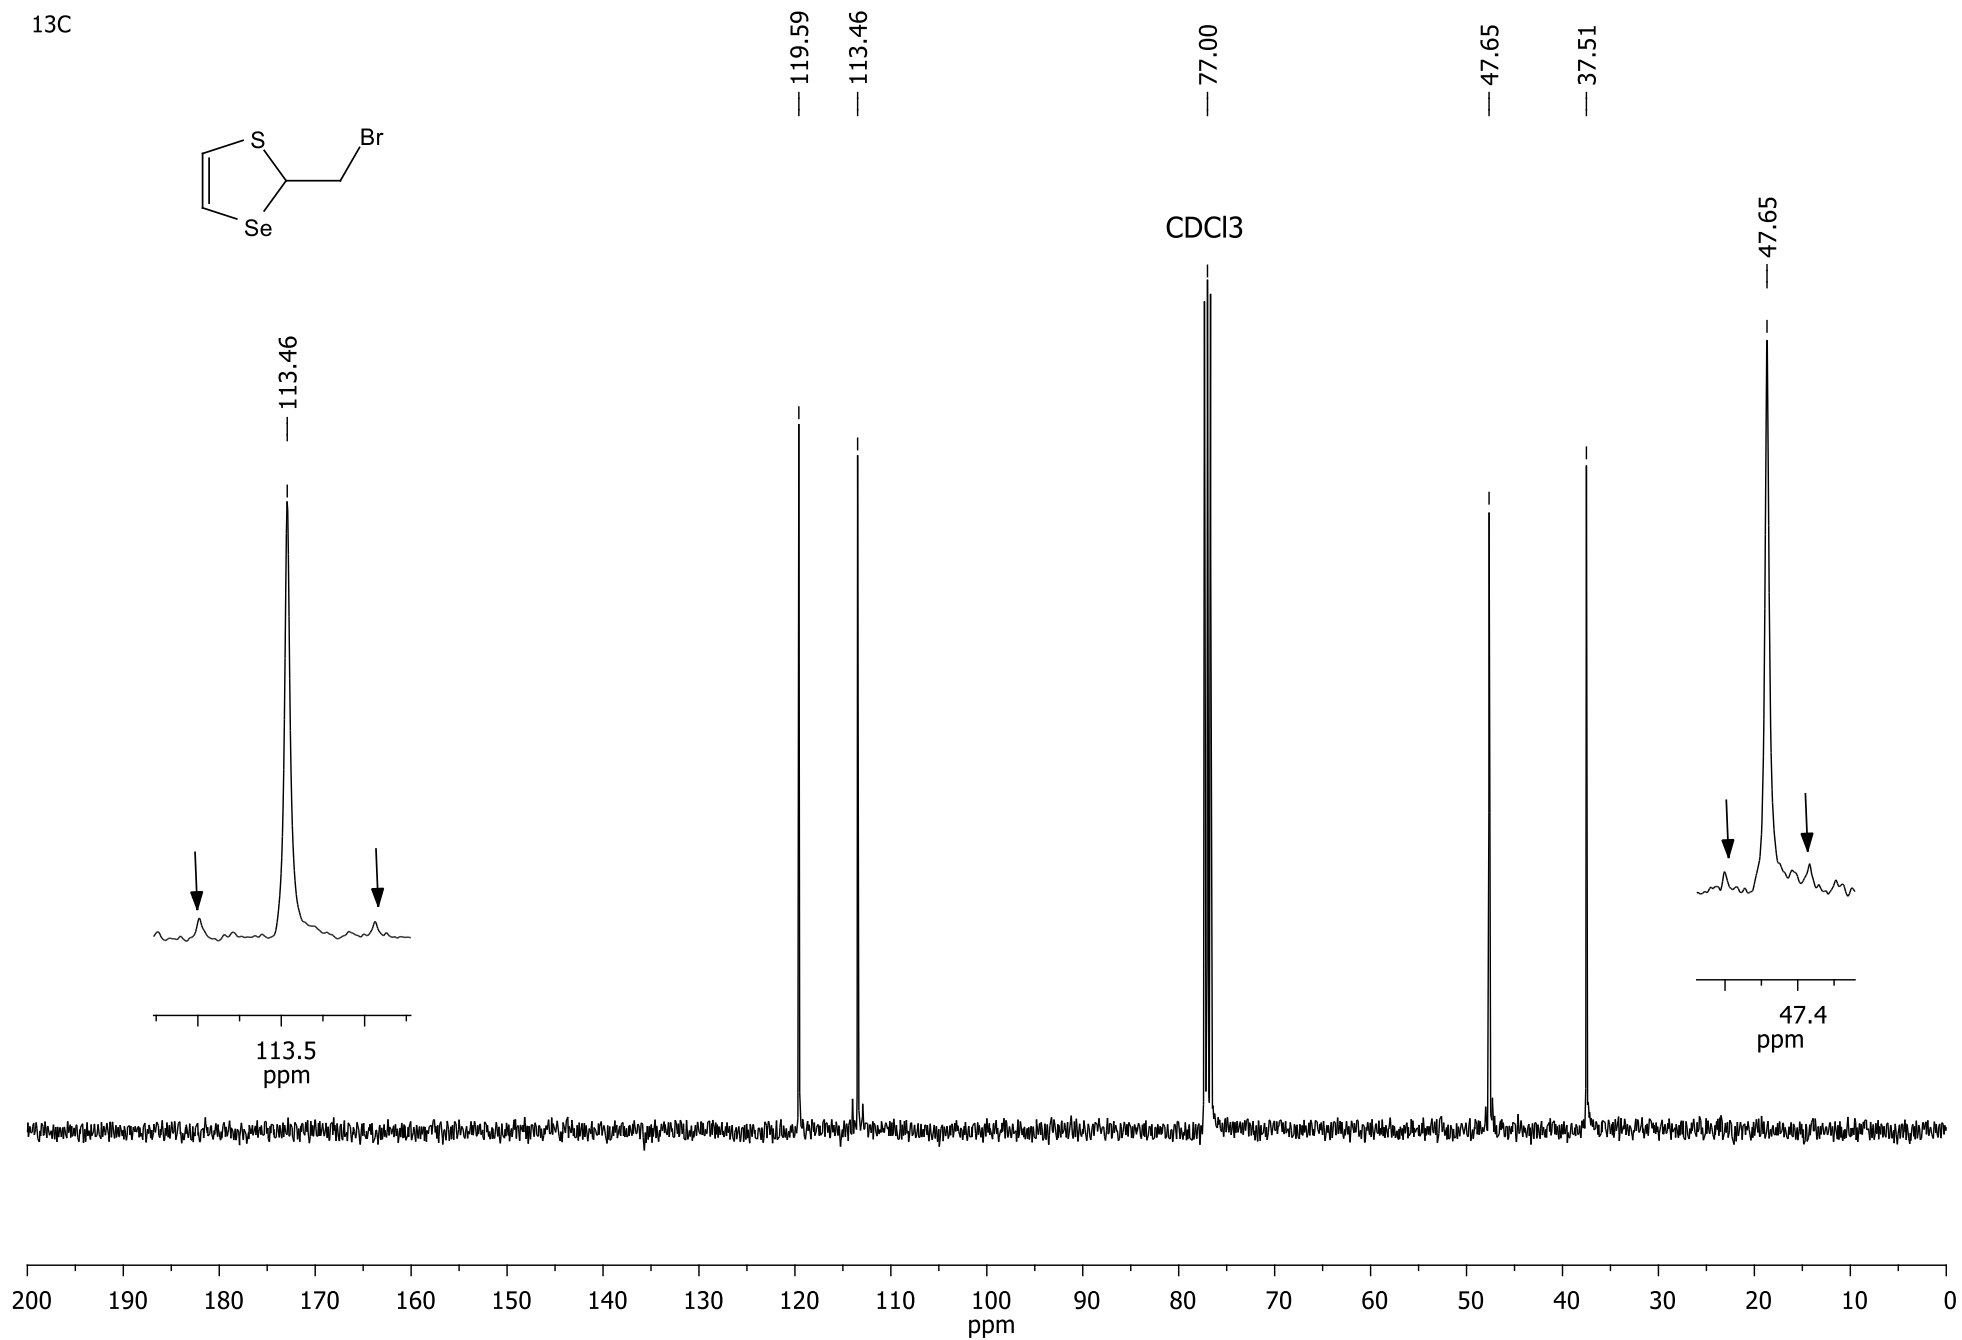

**<sup>13</sup>C NMR spectrum of 2-bromomethyl-1,3-thiaselenole (1)**

$^{77}\text{Se}$

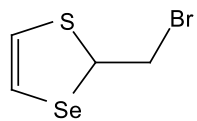

— 521.57

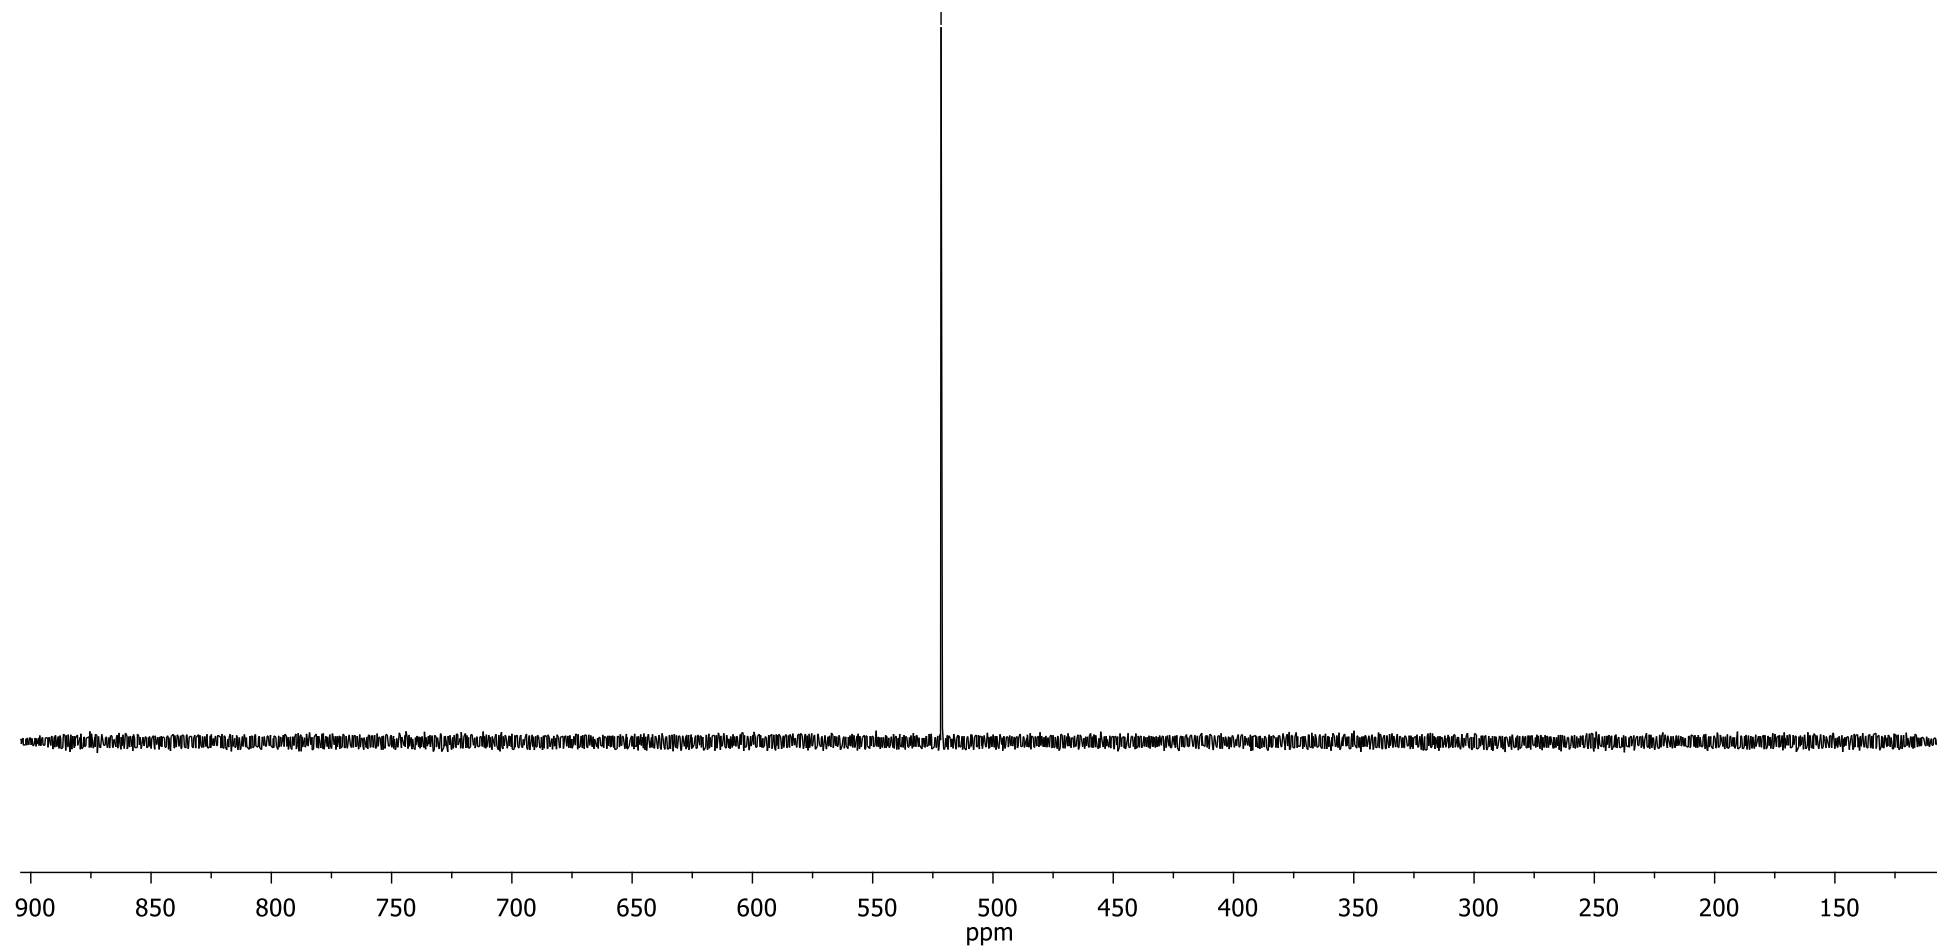

$^{77}\text{Se}$  NMR spectrum of 2-bromomethyl-1,3-thiaselenole (1)

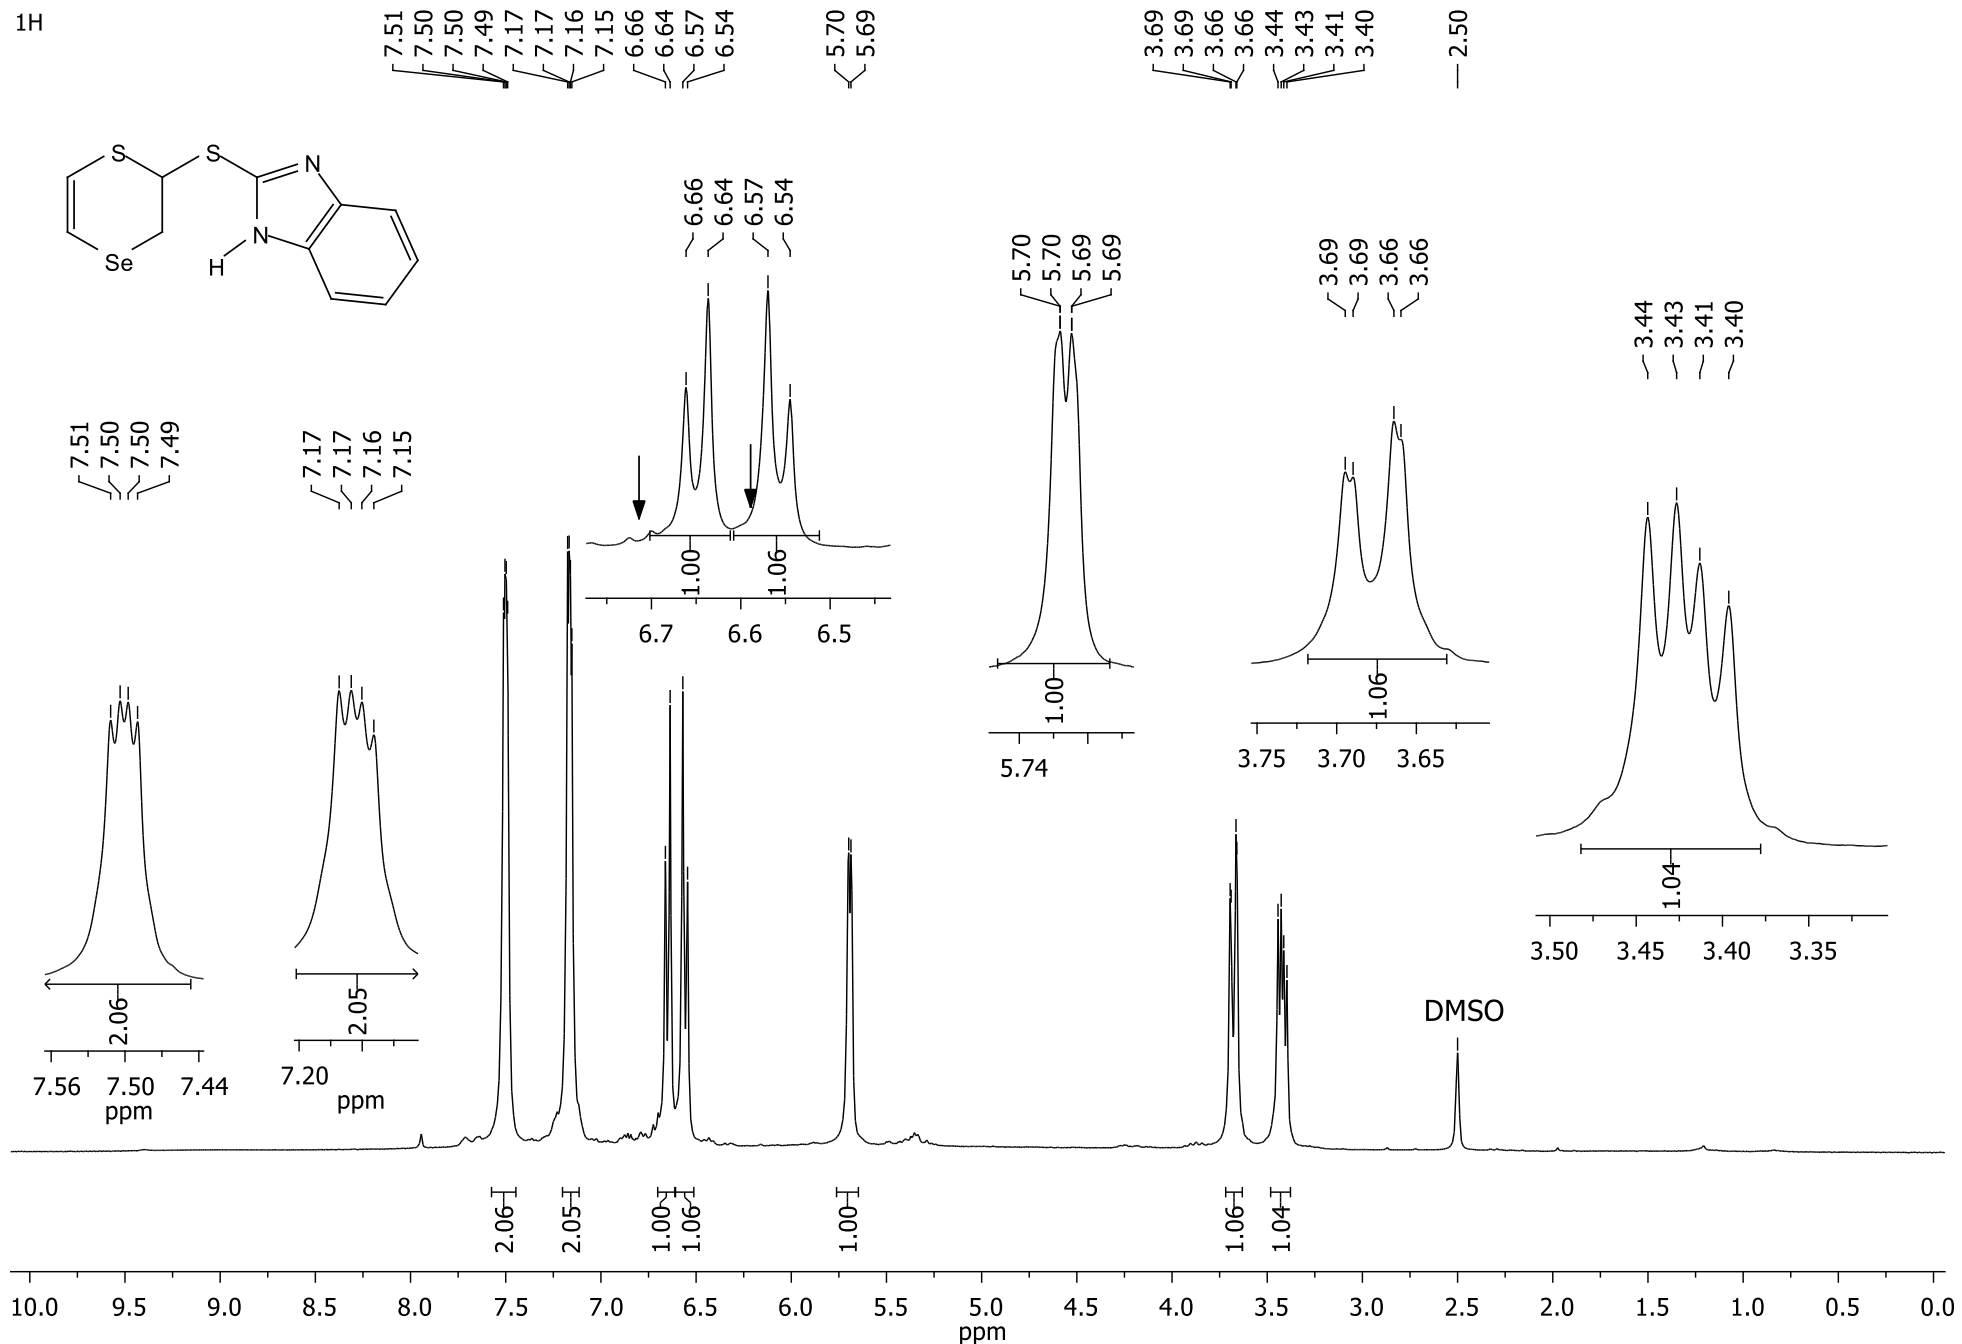

<sup>1</sup>H NMR spectrum of 2-(2,3-dihydro-1,4-thiaselenin-2-ylsulfanyl)-1H-1,3-benzimidazole (3a)

<sup>13</sup>C

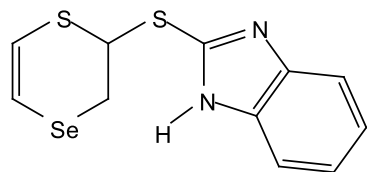

— 147.84

— 139.55

— 122.43

— 118.24

— 114.63

— 111.00

— 45.14

— 40.00

— 25.64

DMSO

— 111.00

— 25.64

111.0

25.8 25.2

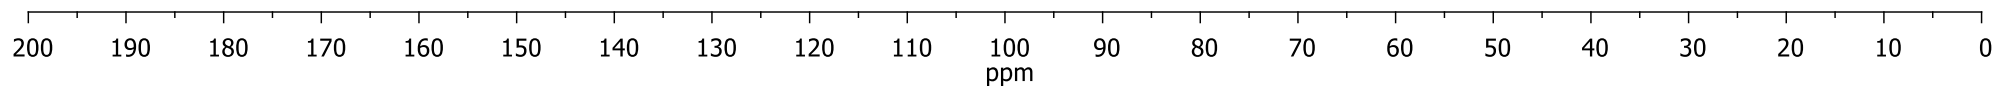

<sup>13</sup>C NMR spectrum of 2-(2,3-dihydro-1,4-thiaselenin-2-ylsulfanyl)-1H-1,3-benzimidazole (3a)

$^{77}\text{Se}$

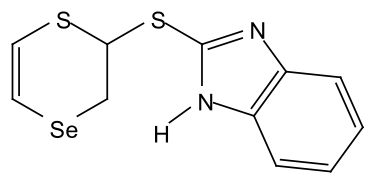

— 171.46

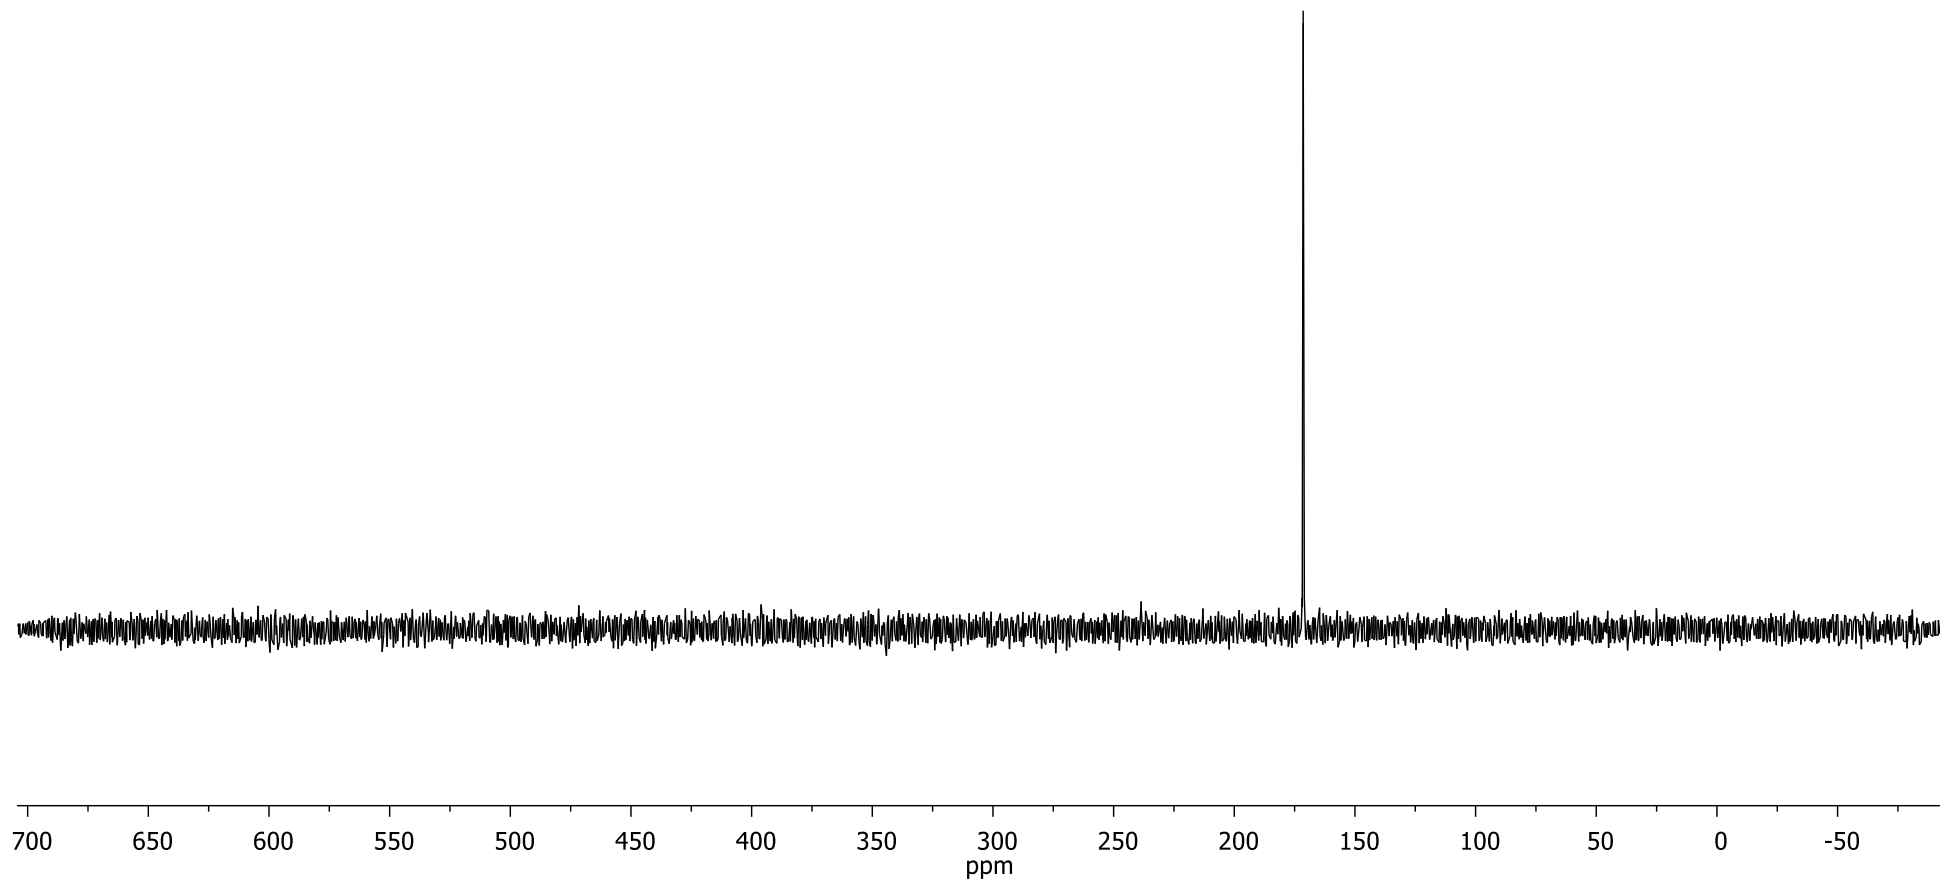

$^{77}\text{Se}$  NMR spectrum of 2-(2,3-dihydro-1,4-thiaselenin-2-ylsulfanyl)-1H-1,3-benzimidazole (3a)



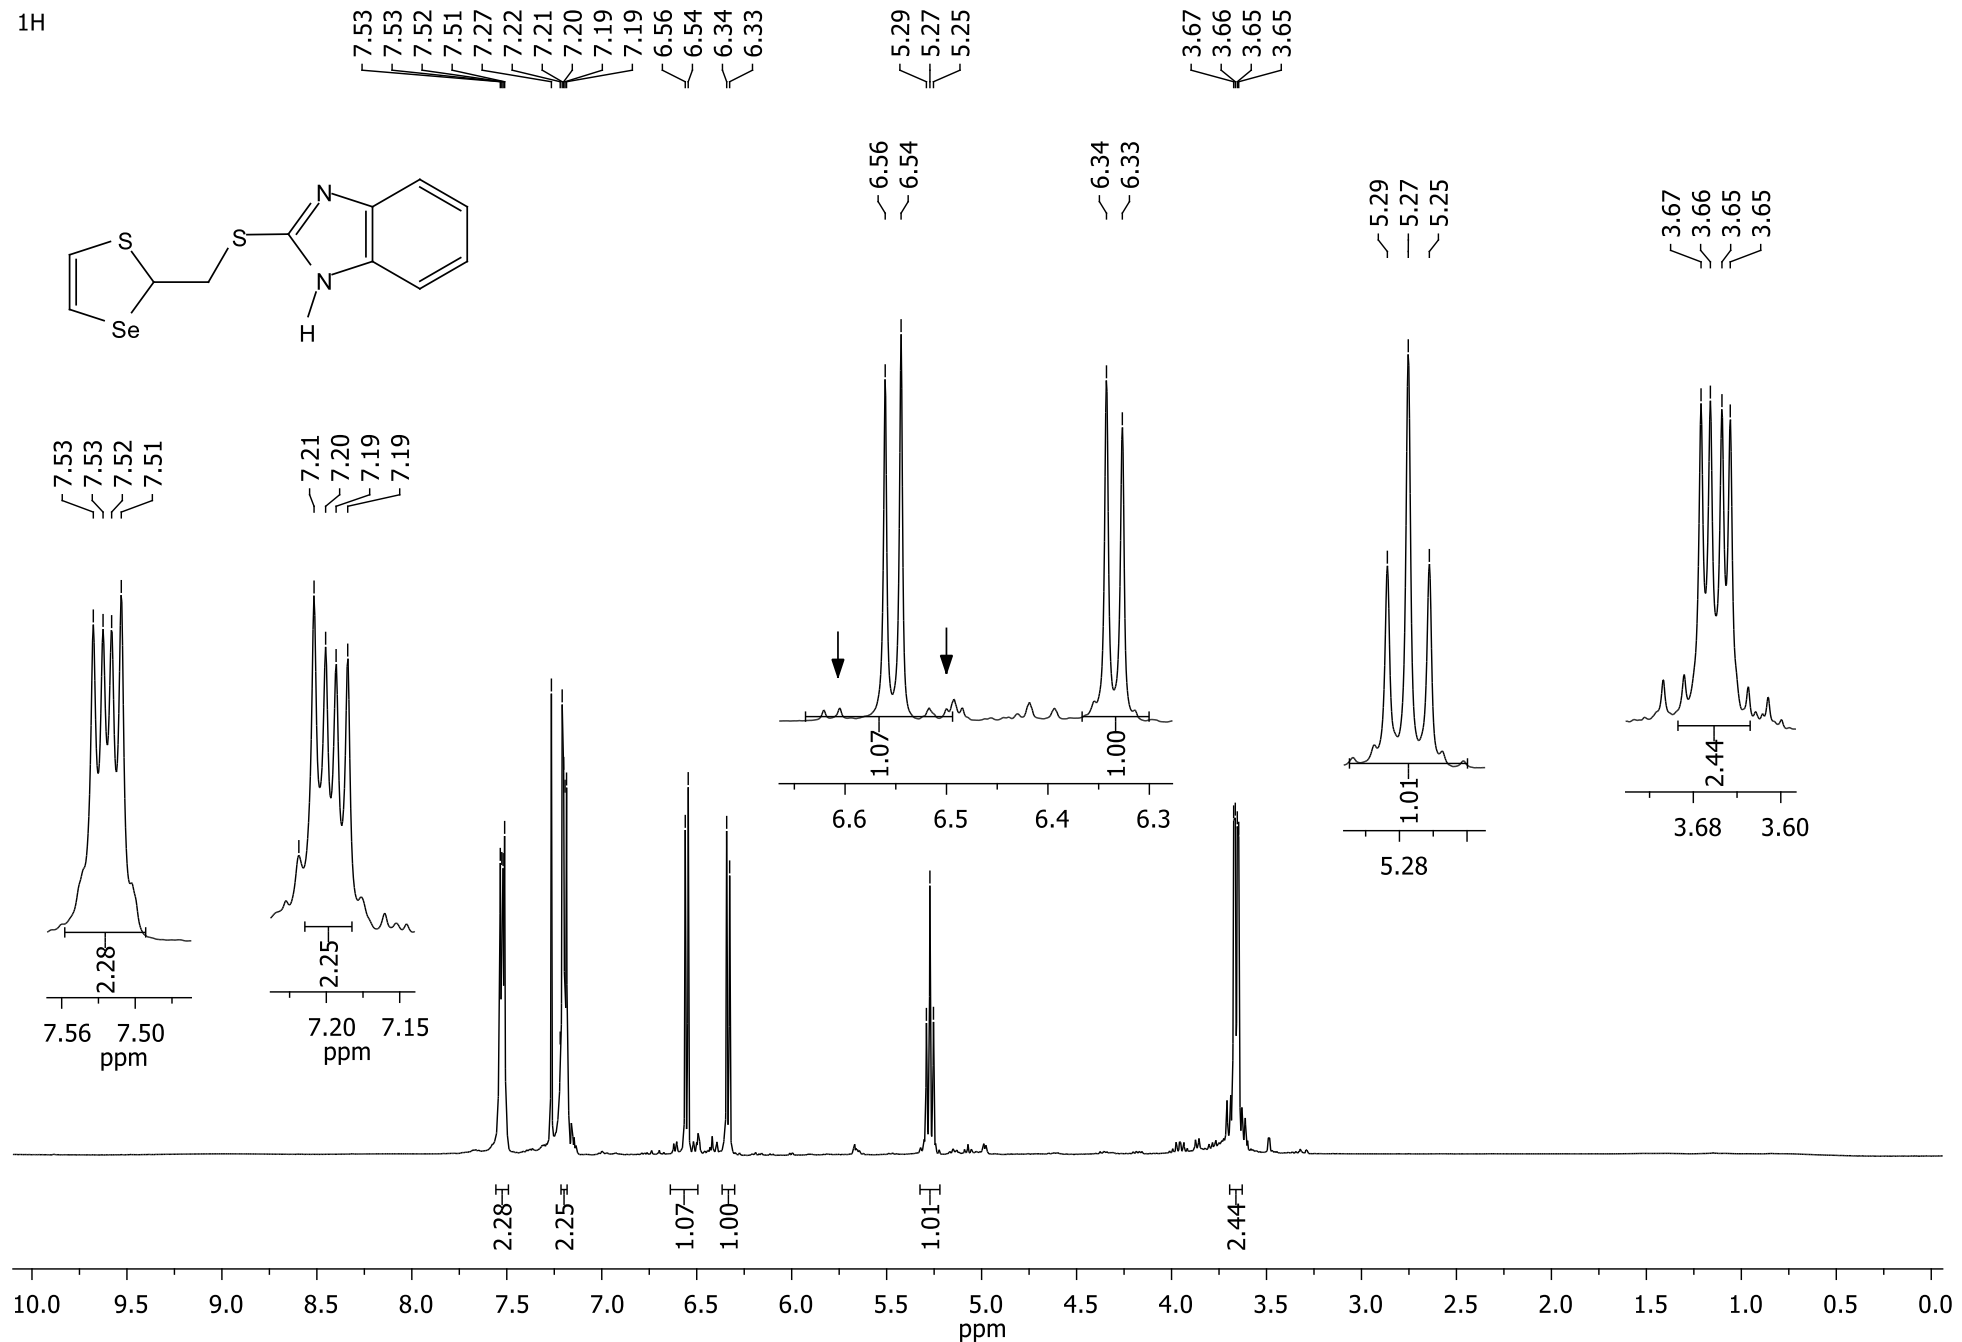

**<sup>1</sup>H NMR spectrum of 2-[(1,3-thiaselenol-2-ylmethyl)sulfanyl]-1H-1,3-benzimidazole (4a)**

<sup>13</sup>C

— 149.13      — 137.97      — 123.12  
— 119.72      — 77.00      — 47.05  
— 114.14      — 41.39

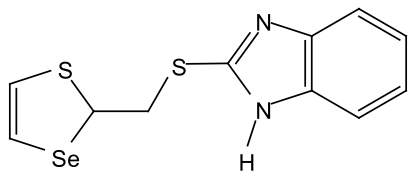

CDCI3

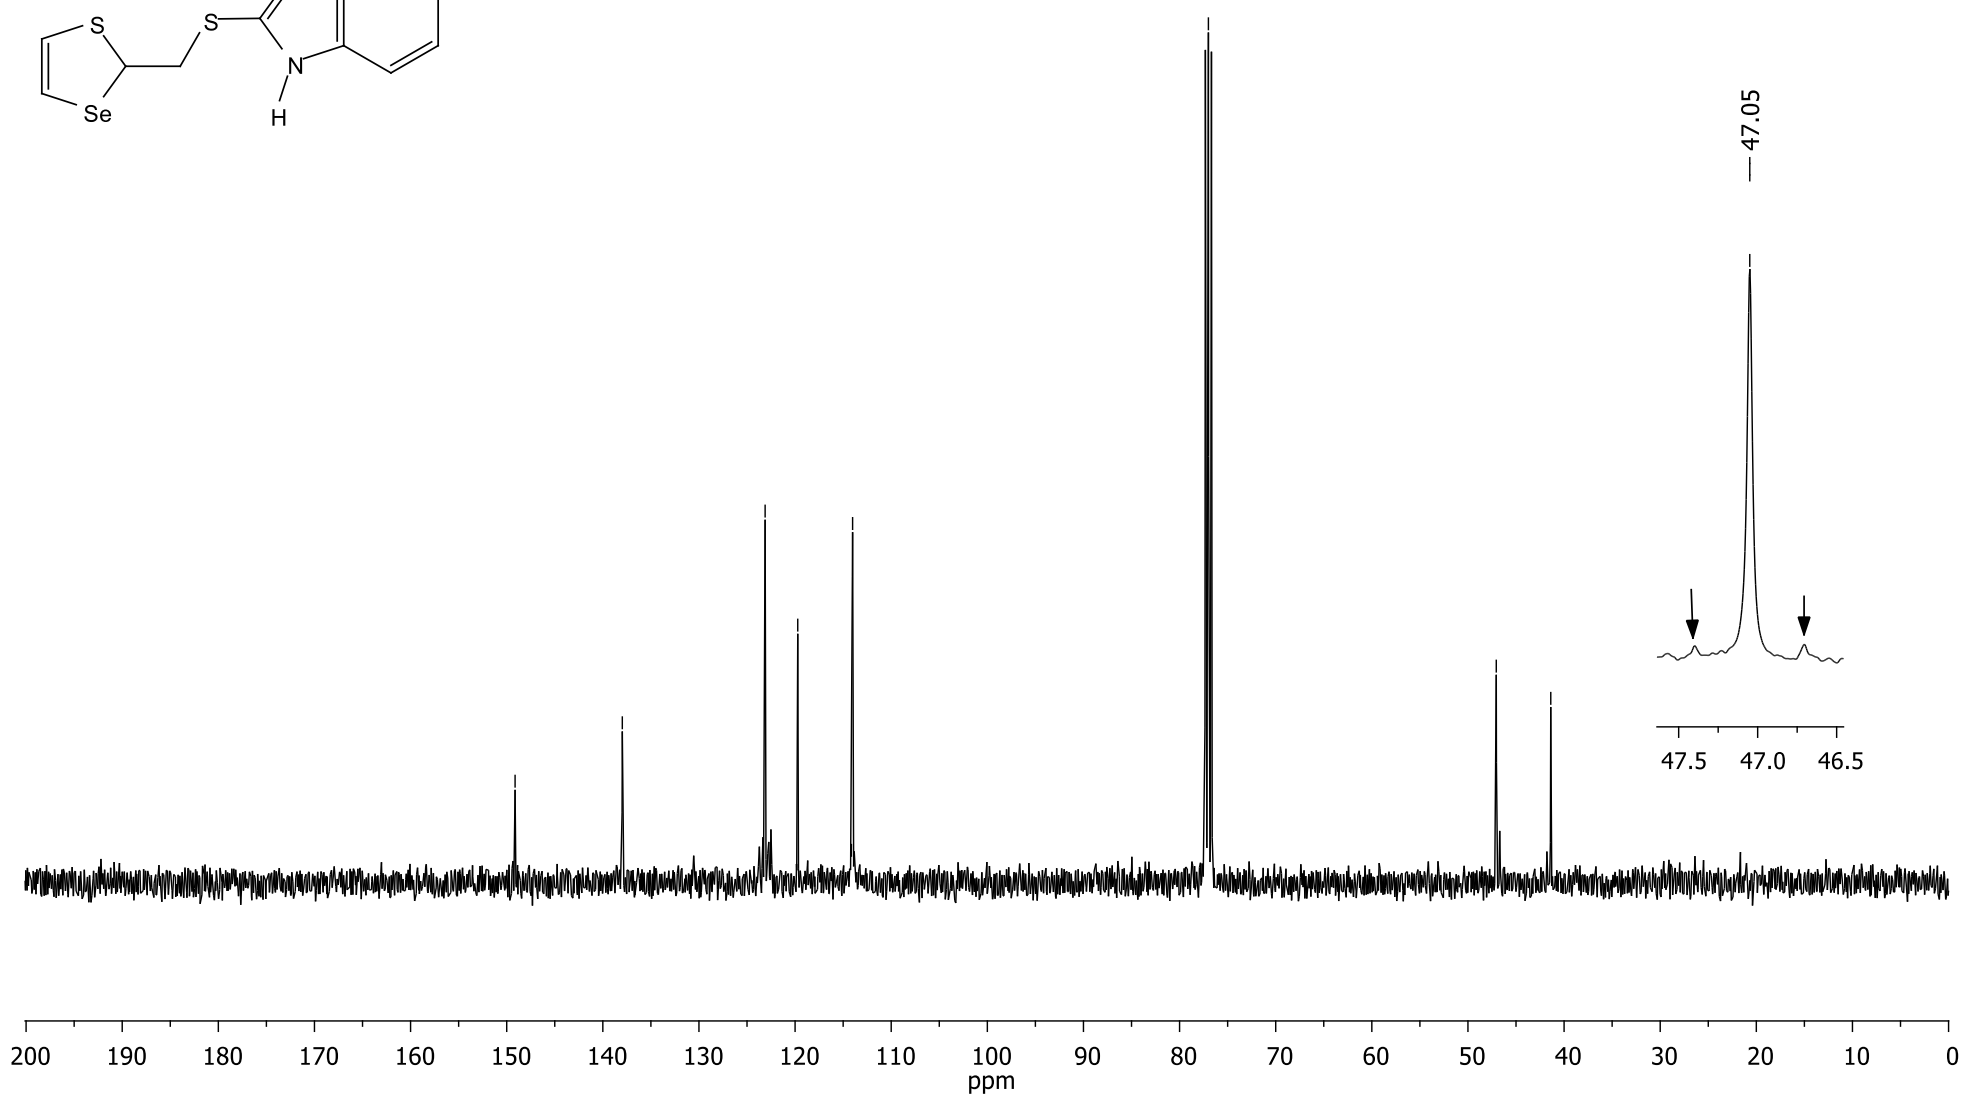

<sup>13</sup>C NMR spectrum of 2-[(1,3-thiaselenol-2-ylmethyl)sulfanyl]-1H-1,3-benzimidazole (4a)

<sup>77</sup>Se

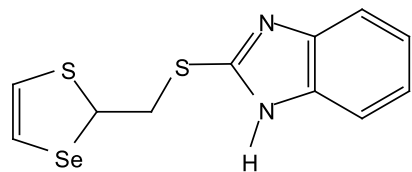

— 520.18

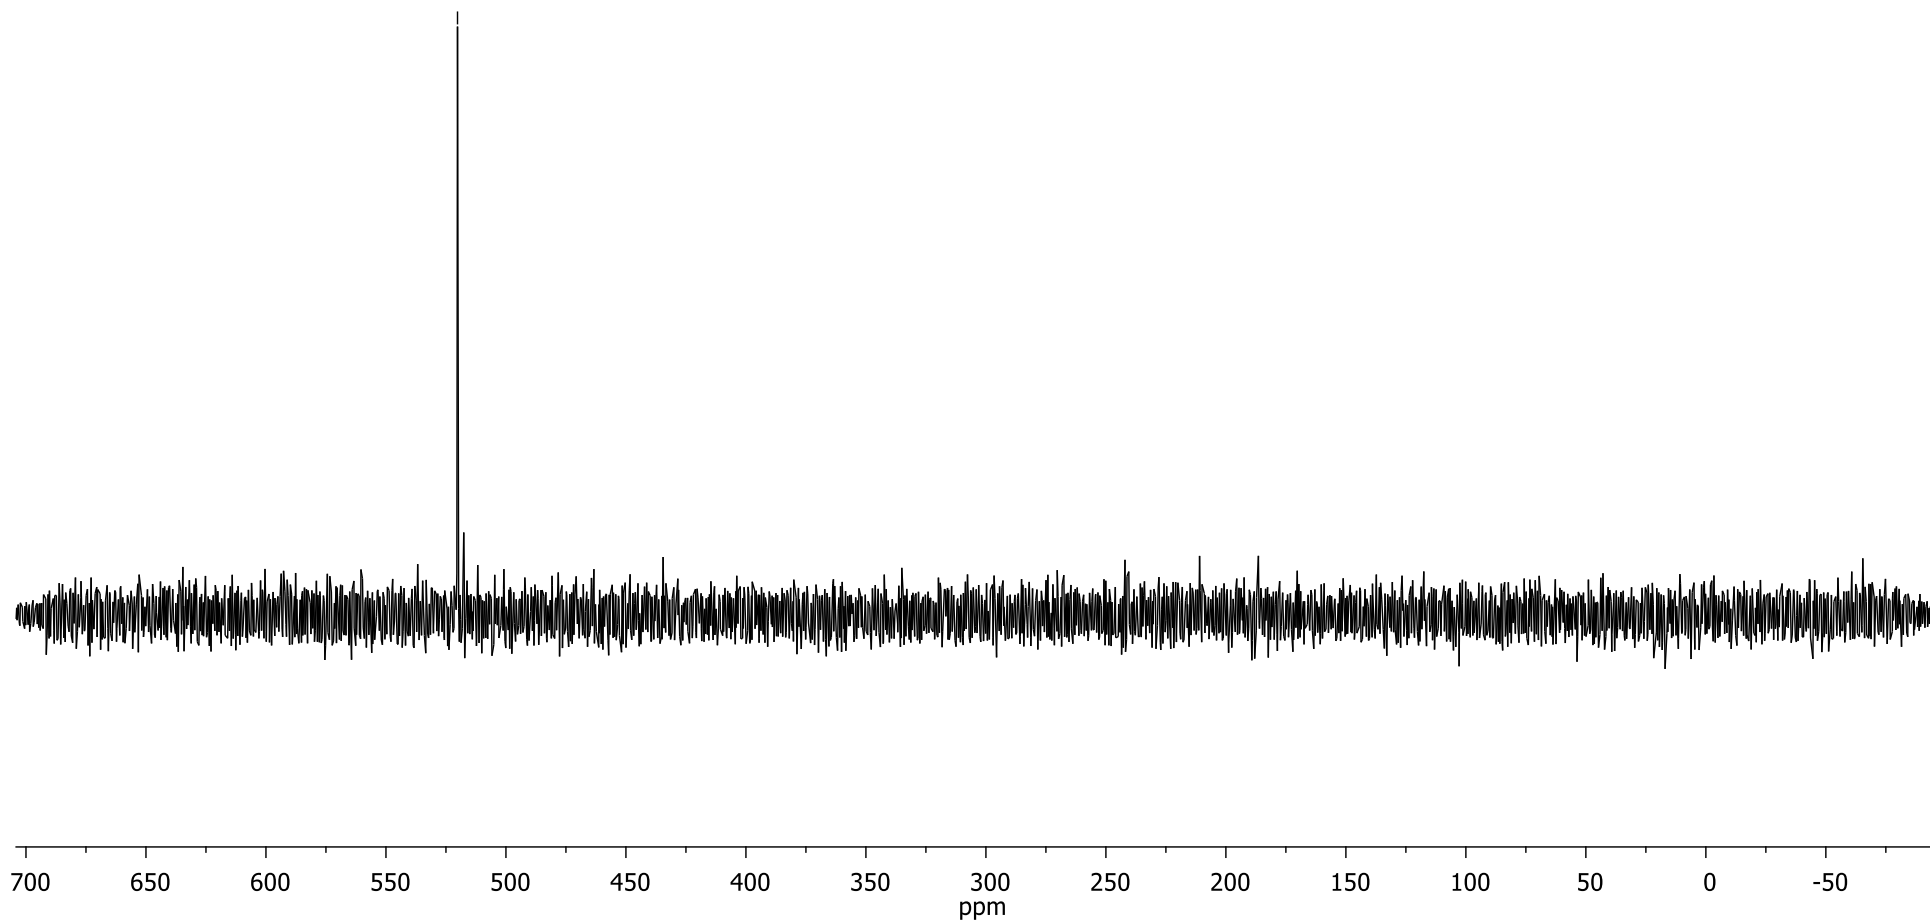

**<sup>77</sup>Se NMR spectrum of 2-[(1,3-thiaselenol-2-yl)methyl]sulfanyl-1H-1,3-benzimidazole (4a)**

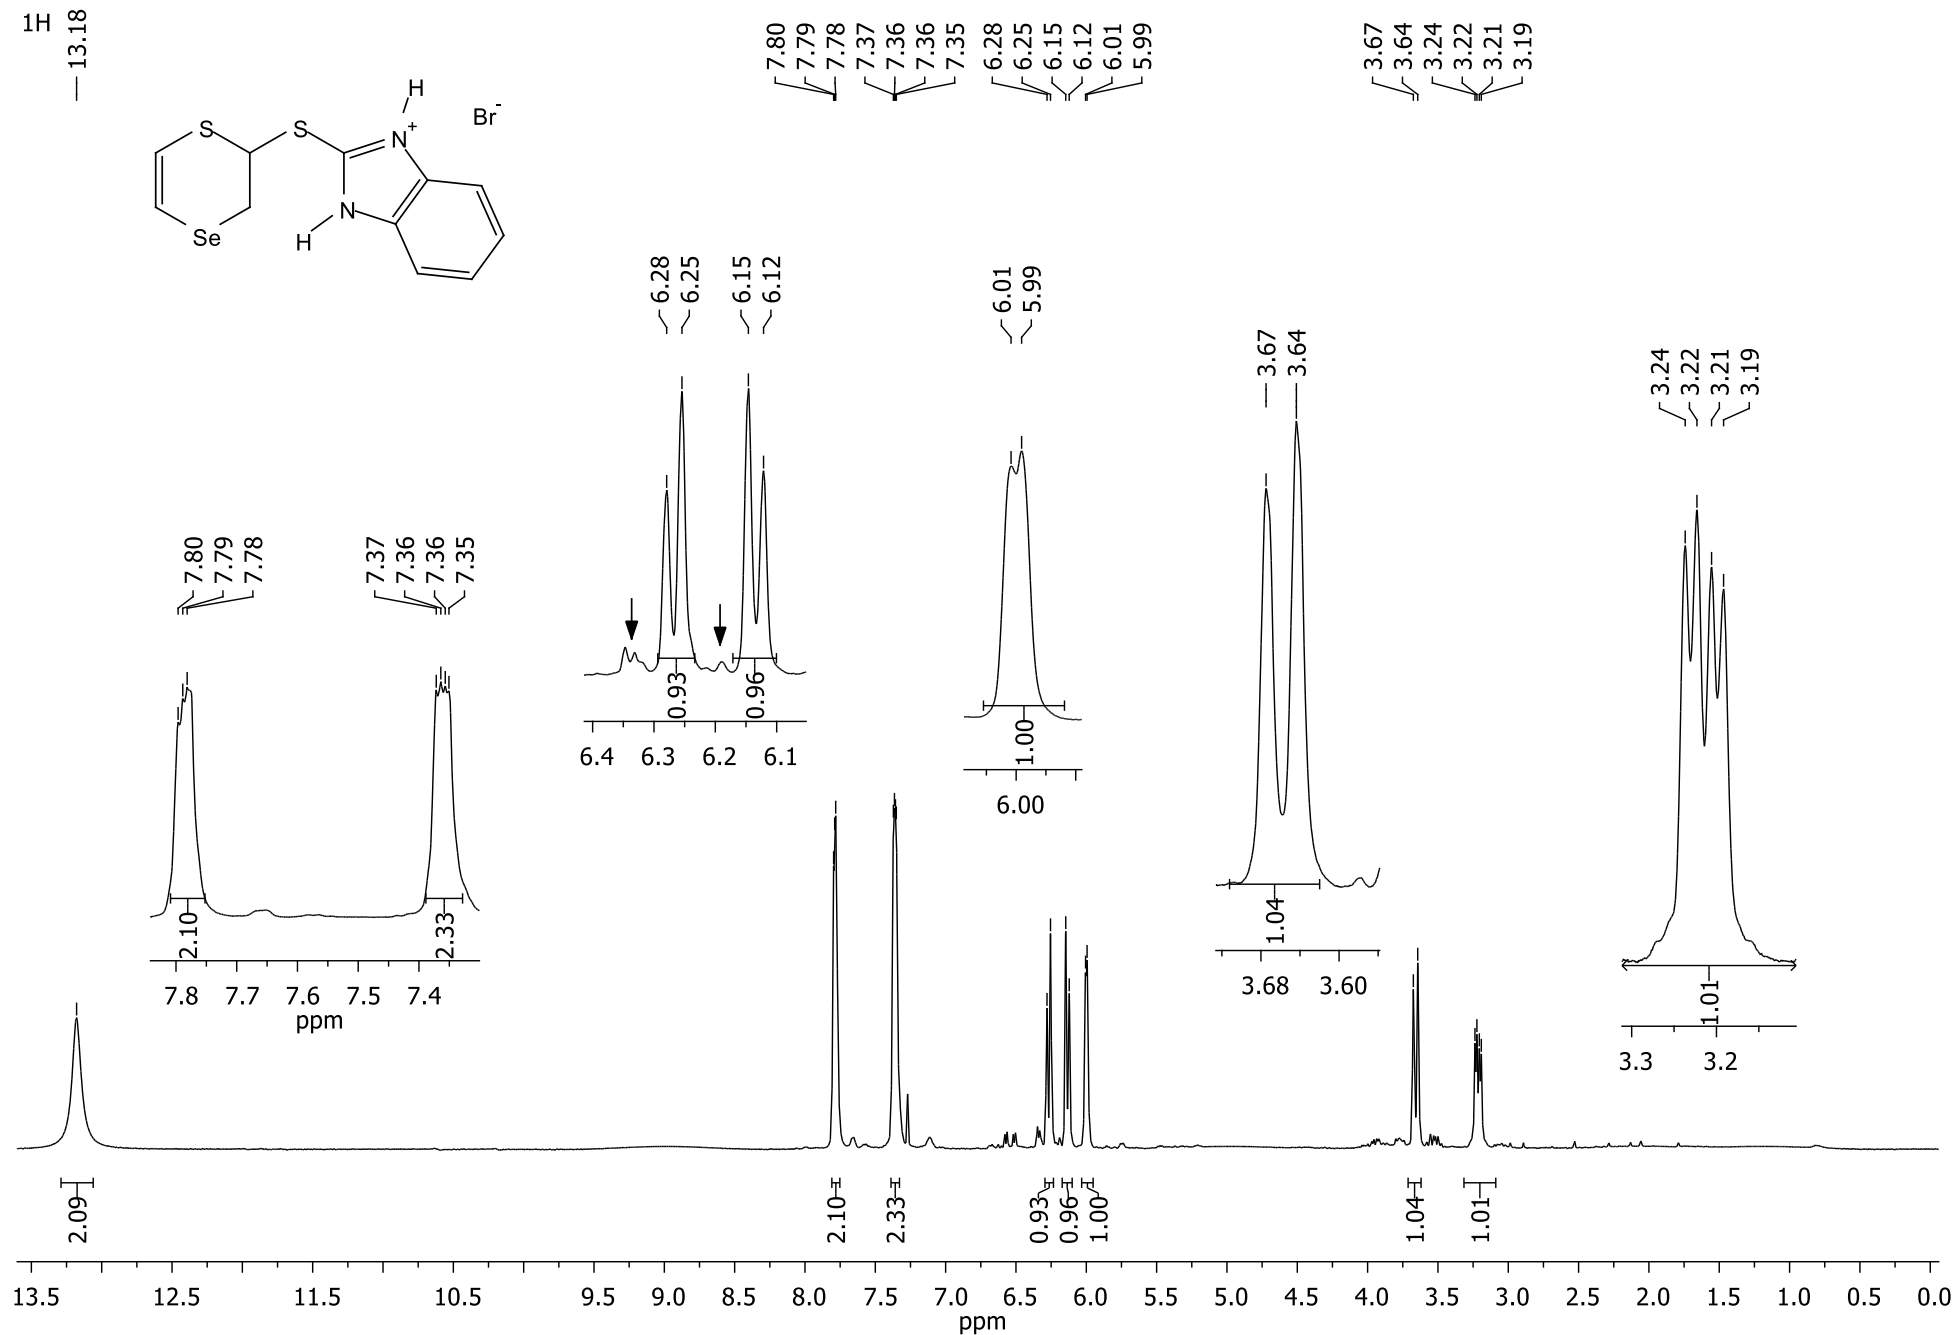

**<sup>1</sup>H NMR spectrum of 2-(2,3-dihydro-1,4-thiaselenin-2-ylsulfanyl)-3H-1,3-benzimidazol-1-ium bromide (5a)**

13C

— 146.65  
— 132.76  
— 125.61  
~ 115.76  
~ 113.66  
~ 111.00  
— 77.00  
— 46.68  
— 25.27

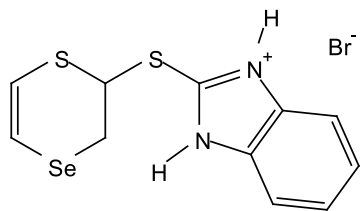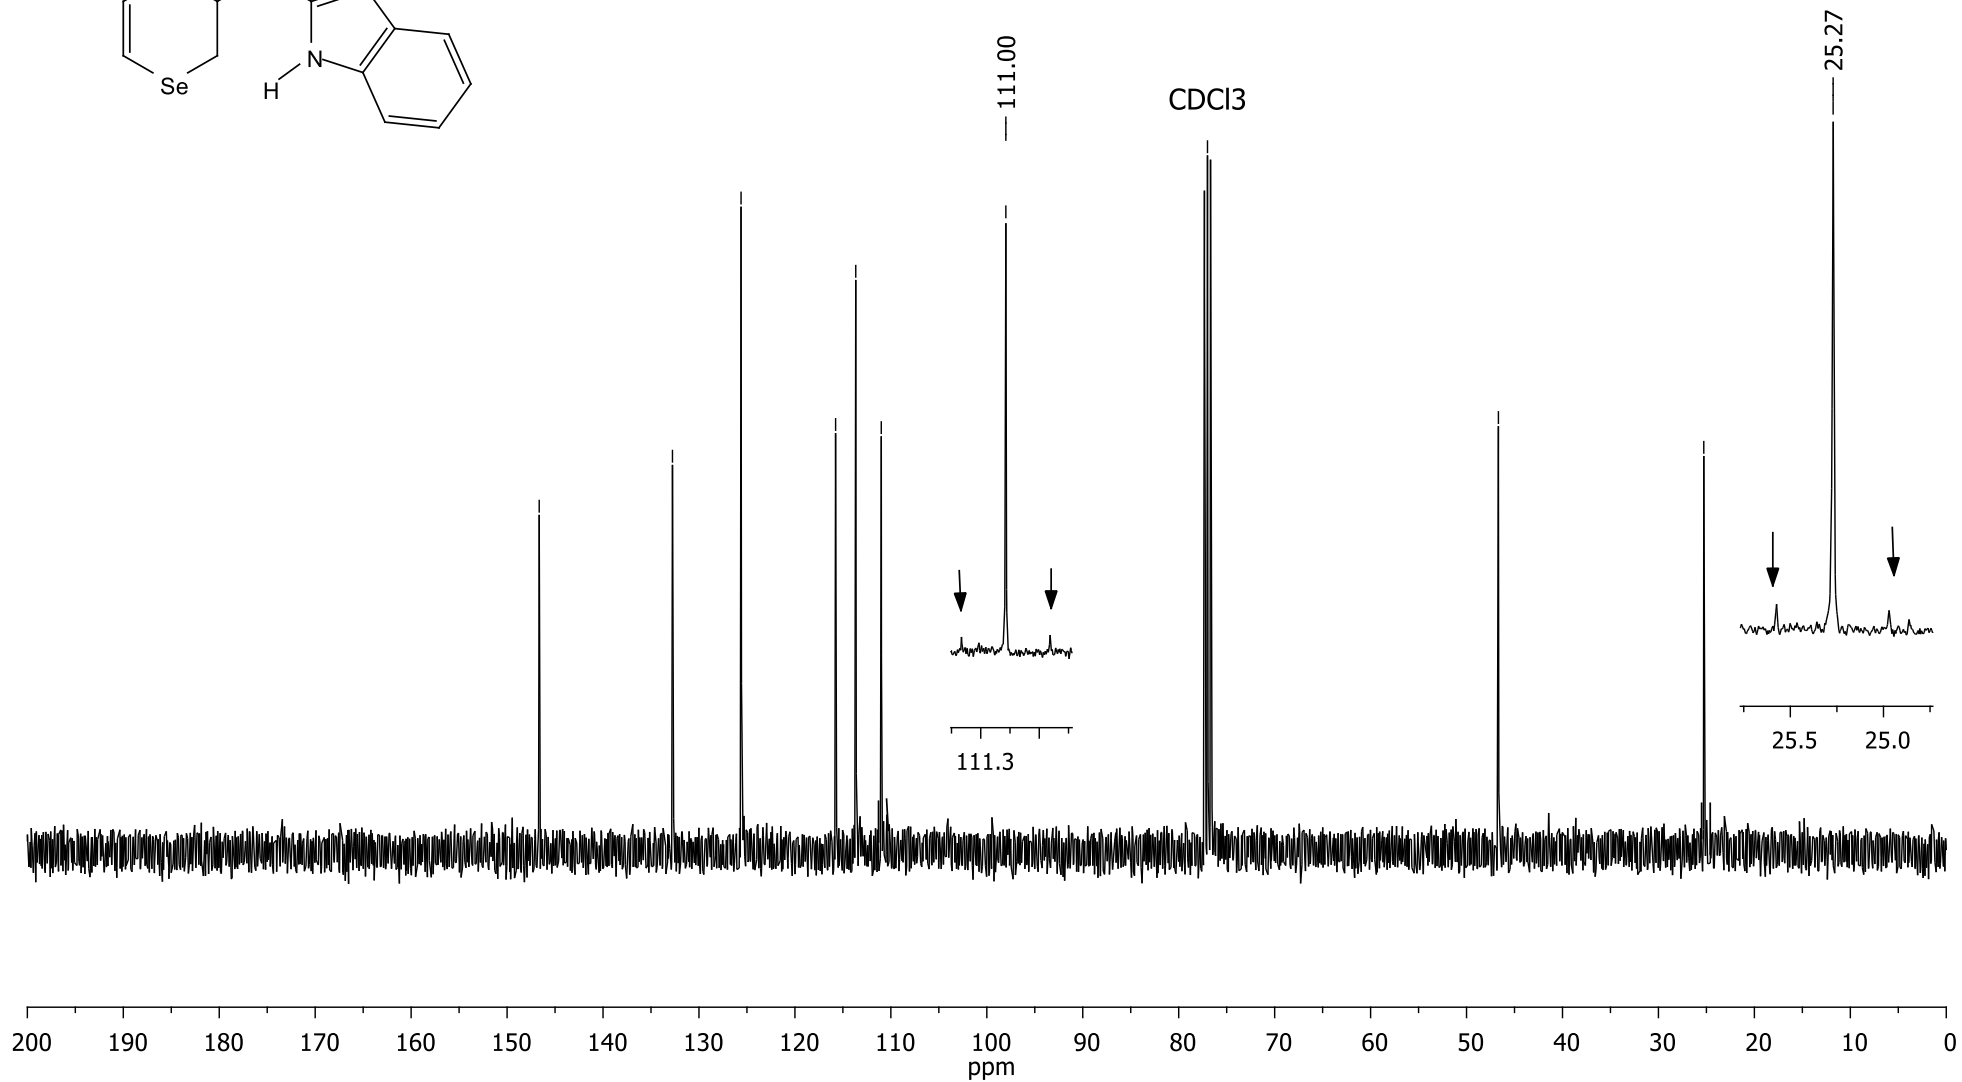

**<sup>13</sup>C NMR spectrum of 2-(2,3-dihydro-1,4-thiaselenin-2-ylsulfanyl)-3H-1,3-benzimidazol-1-ium bromide (5a)**

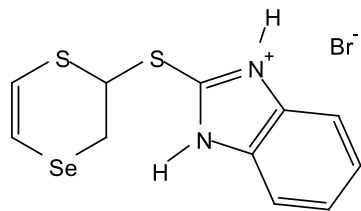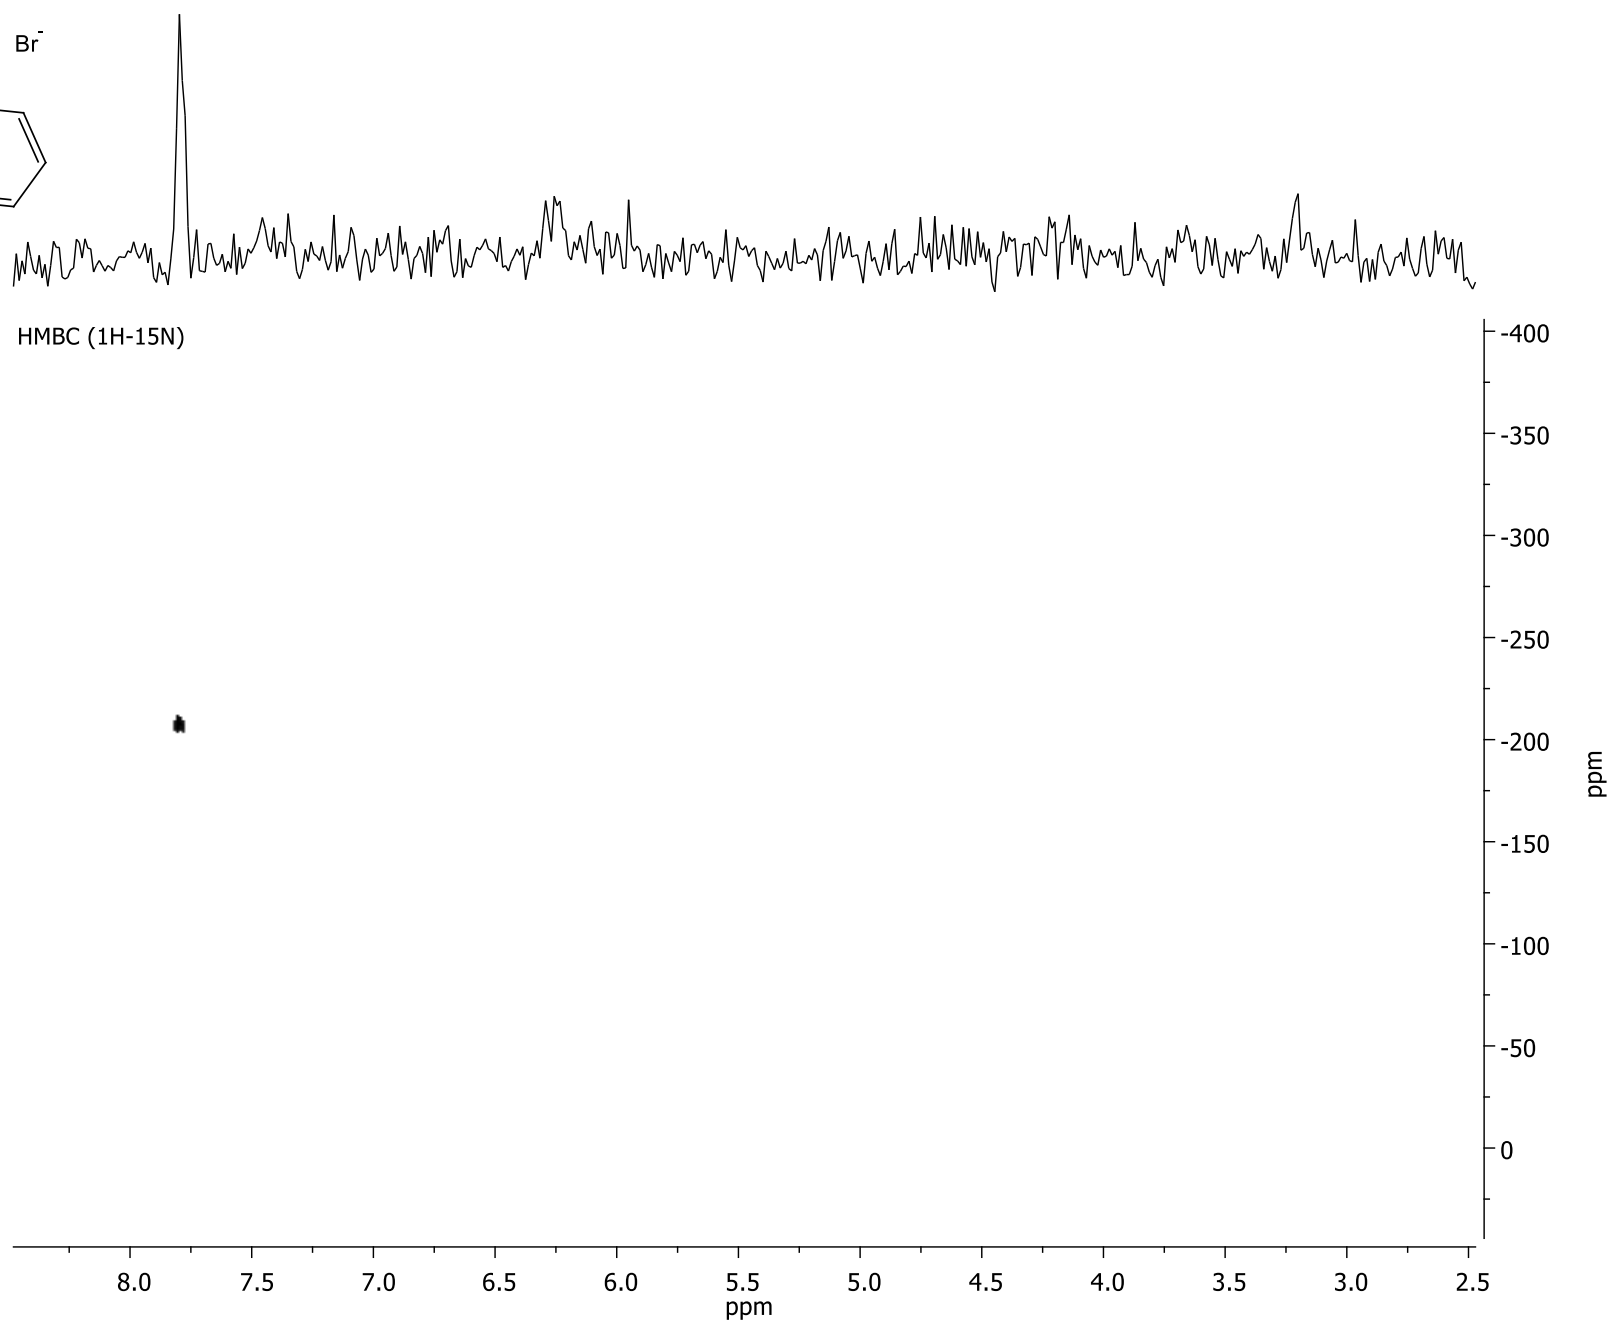

**HMBC (<sup>1</sup>H-<sup>15</sup>N) NMR spectrum of 2-(2,3-dihydro-1,4-thiaselenin-2-ylsulfanyl)-3H-1,3-benzimidazol-1-ium bromide (5a)**

$^{77}\text{Se}$

— 166.41

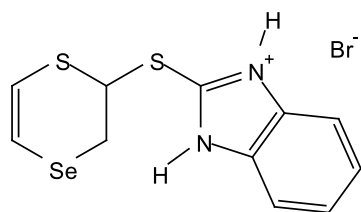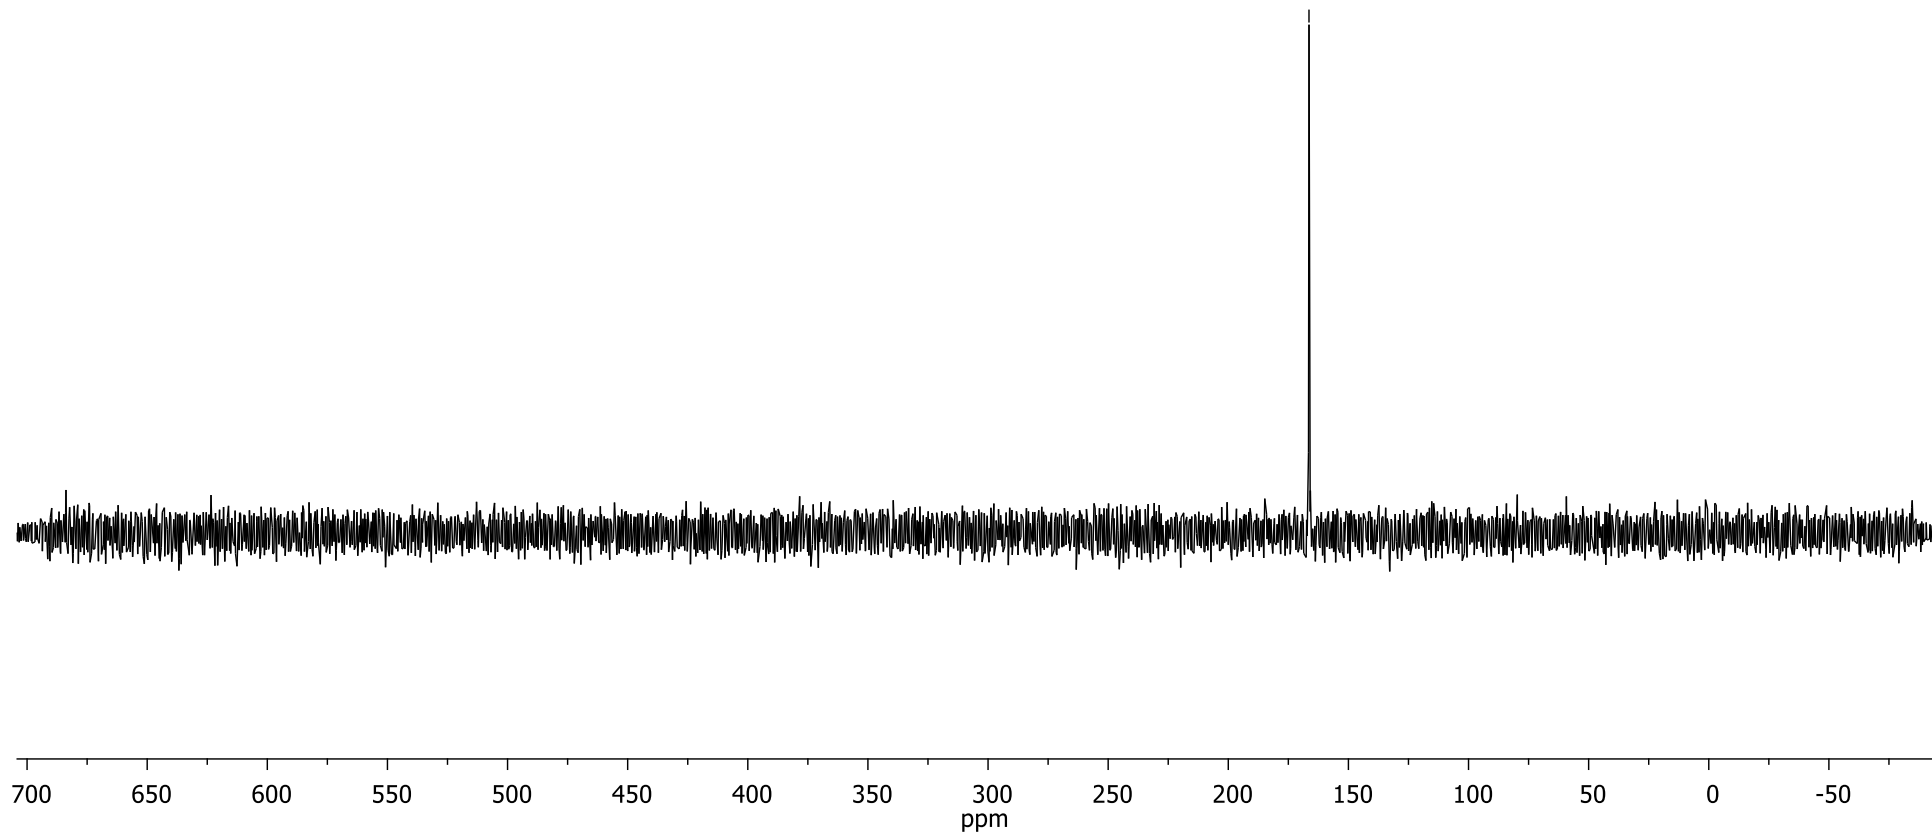

$^{77}\text{Se}$  NMR spectrum of 2-(2,3-dihydro-1,4-thiaselenin-2-ylsulfanyl)-3H-1,3-benzimidazol-1-ium bromide (5a)

<sup>1</sup>H

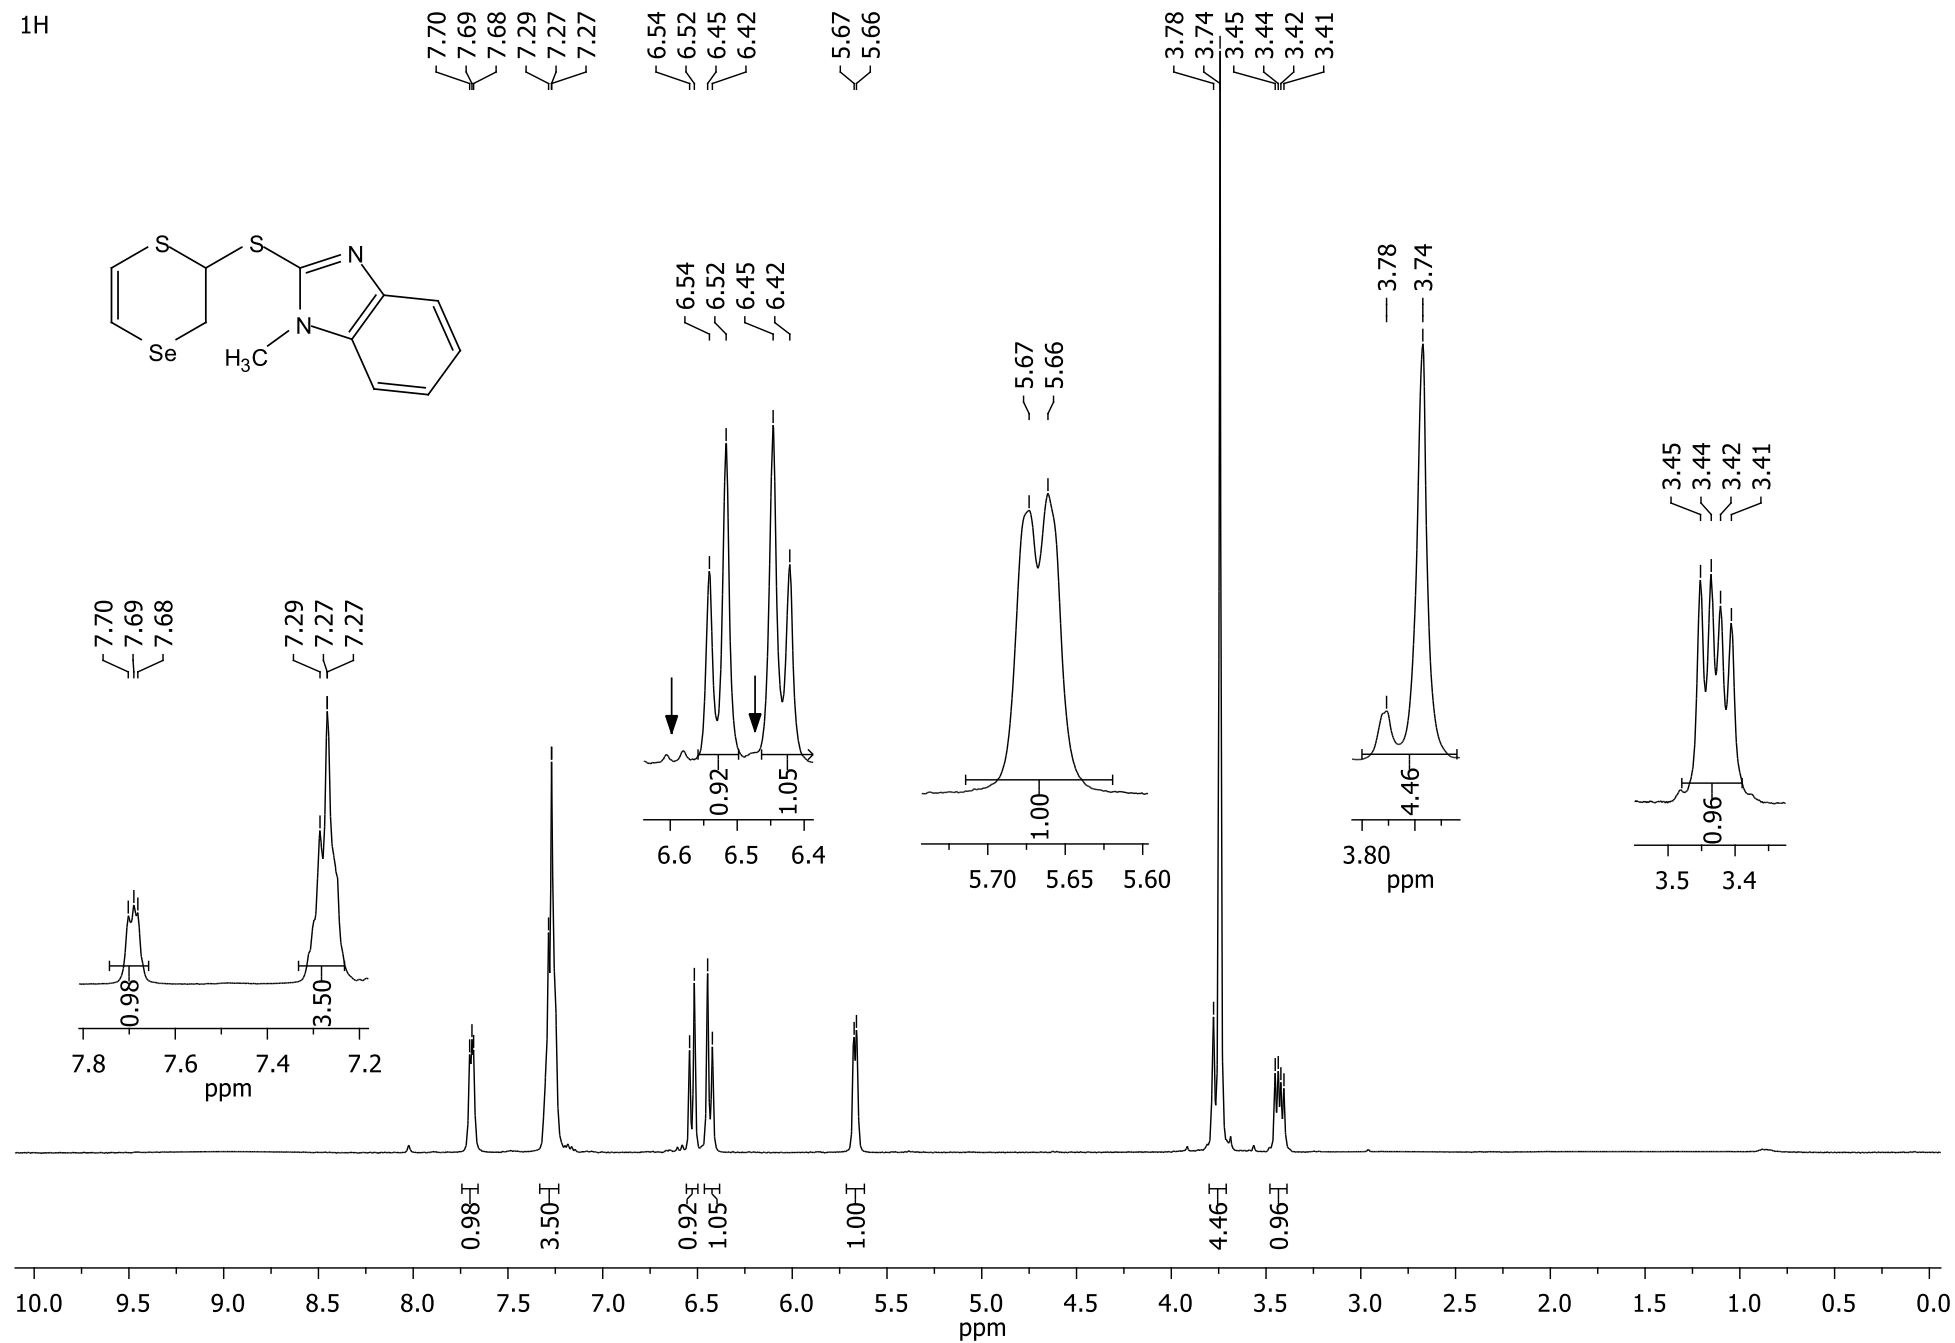

<sup>1</sup>H NMR spectrum of 2-(2,3-dihydro-1,4-thiaselenin-2-ylsulfanyl)-1-methyl-1H-1,3-benzimidazole (3b)



13C

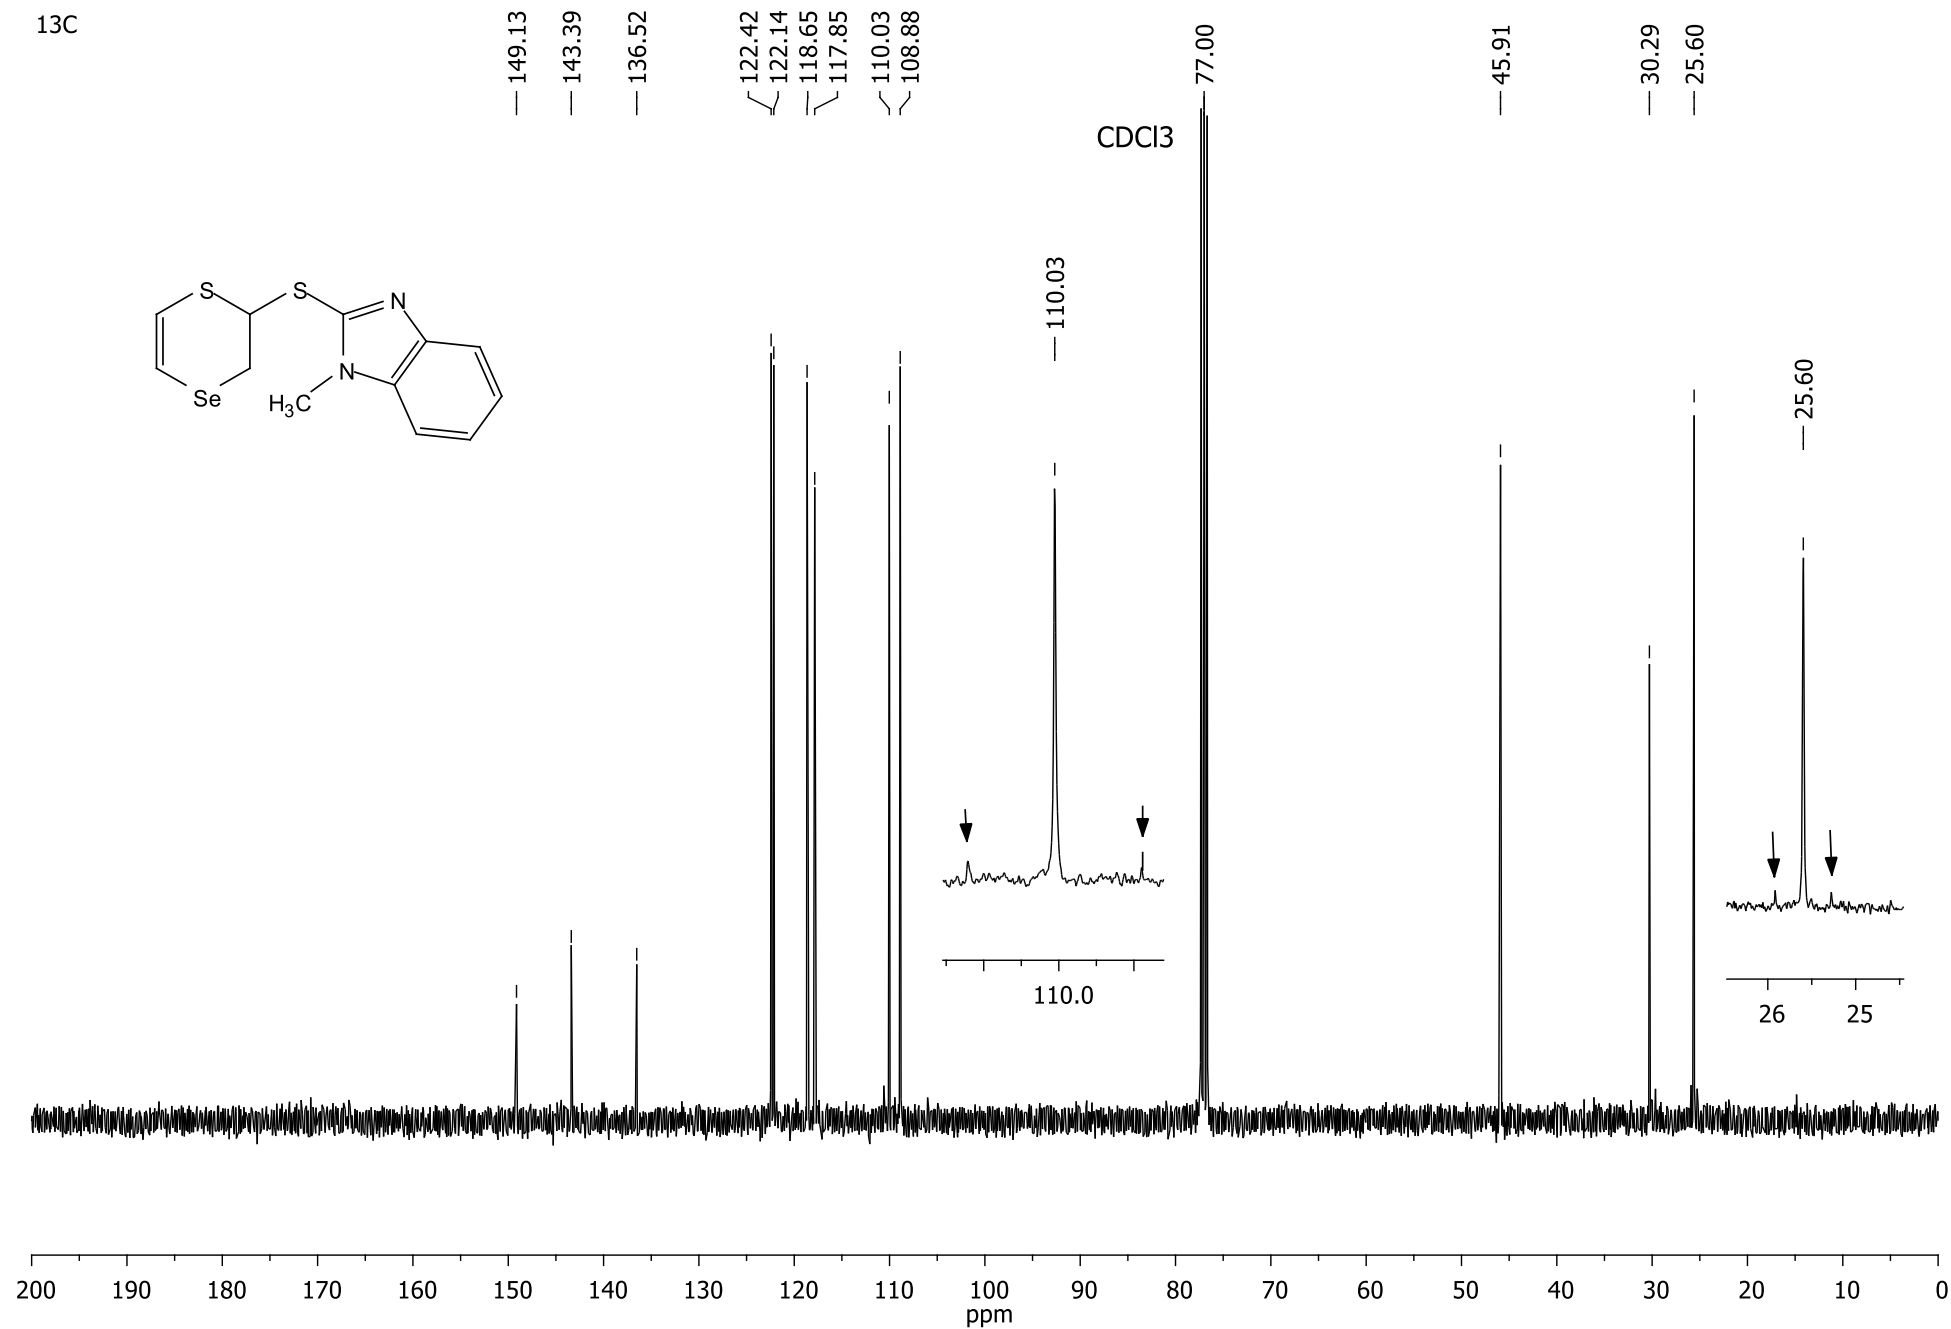

**<sup>13</sup>C NMR spectrum of 2-(2,3-dihydro-1,4-thiaselenin-2-ylsulfanyl)-1-methyl-1H-1,3-benzimidazole (3b)**

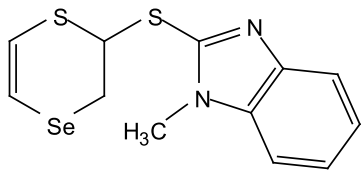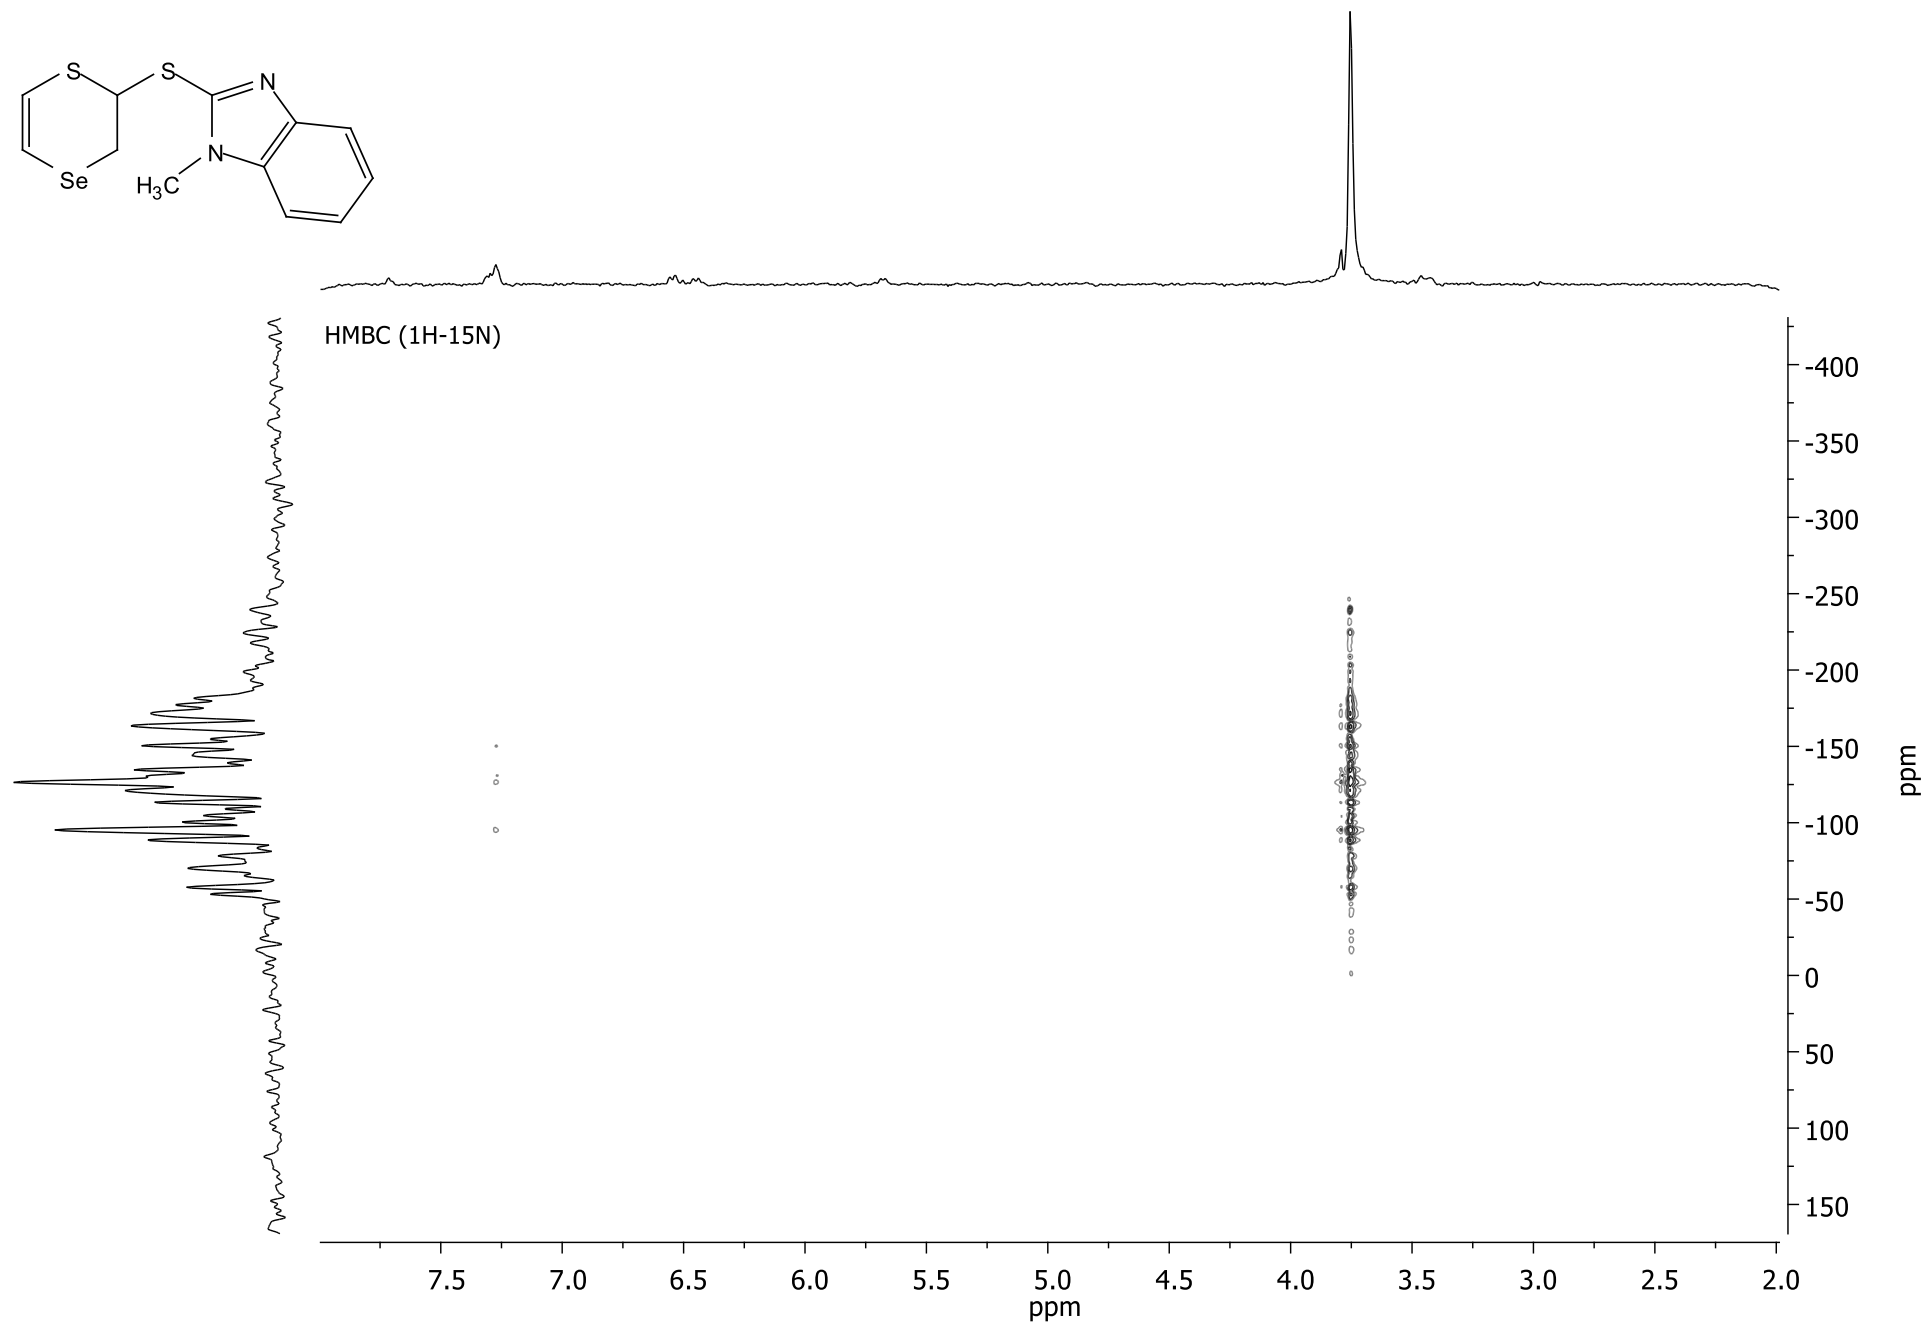

HMBC (<sup>1</sup>H-<sup>15</sup>N) NMR spectrum of 2-(2,3-dihydro-1,4-thiaselenin-2-ylsulfanyl)-1-methyl-1H-1,3-benzimidazole (3b)

$^{77}\text{Se}$

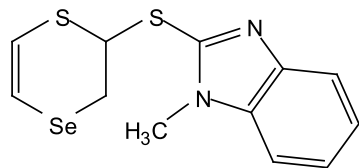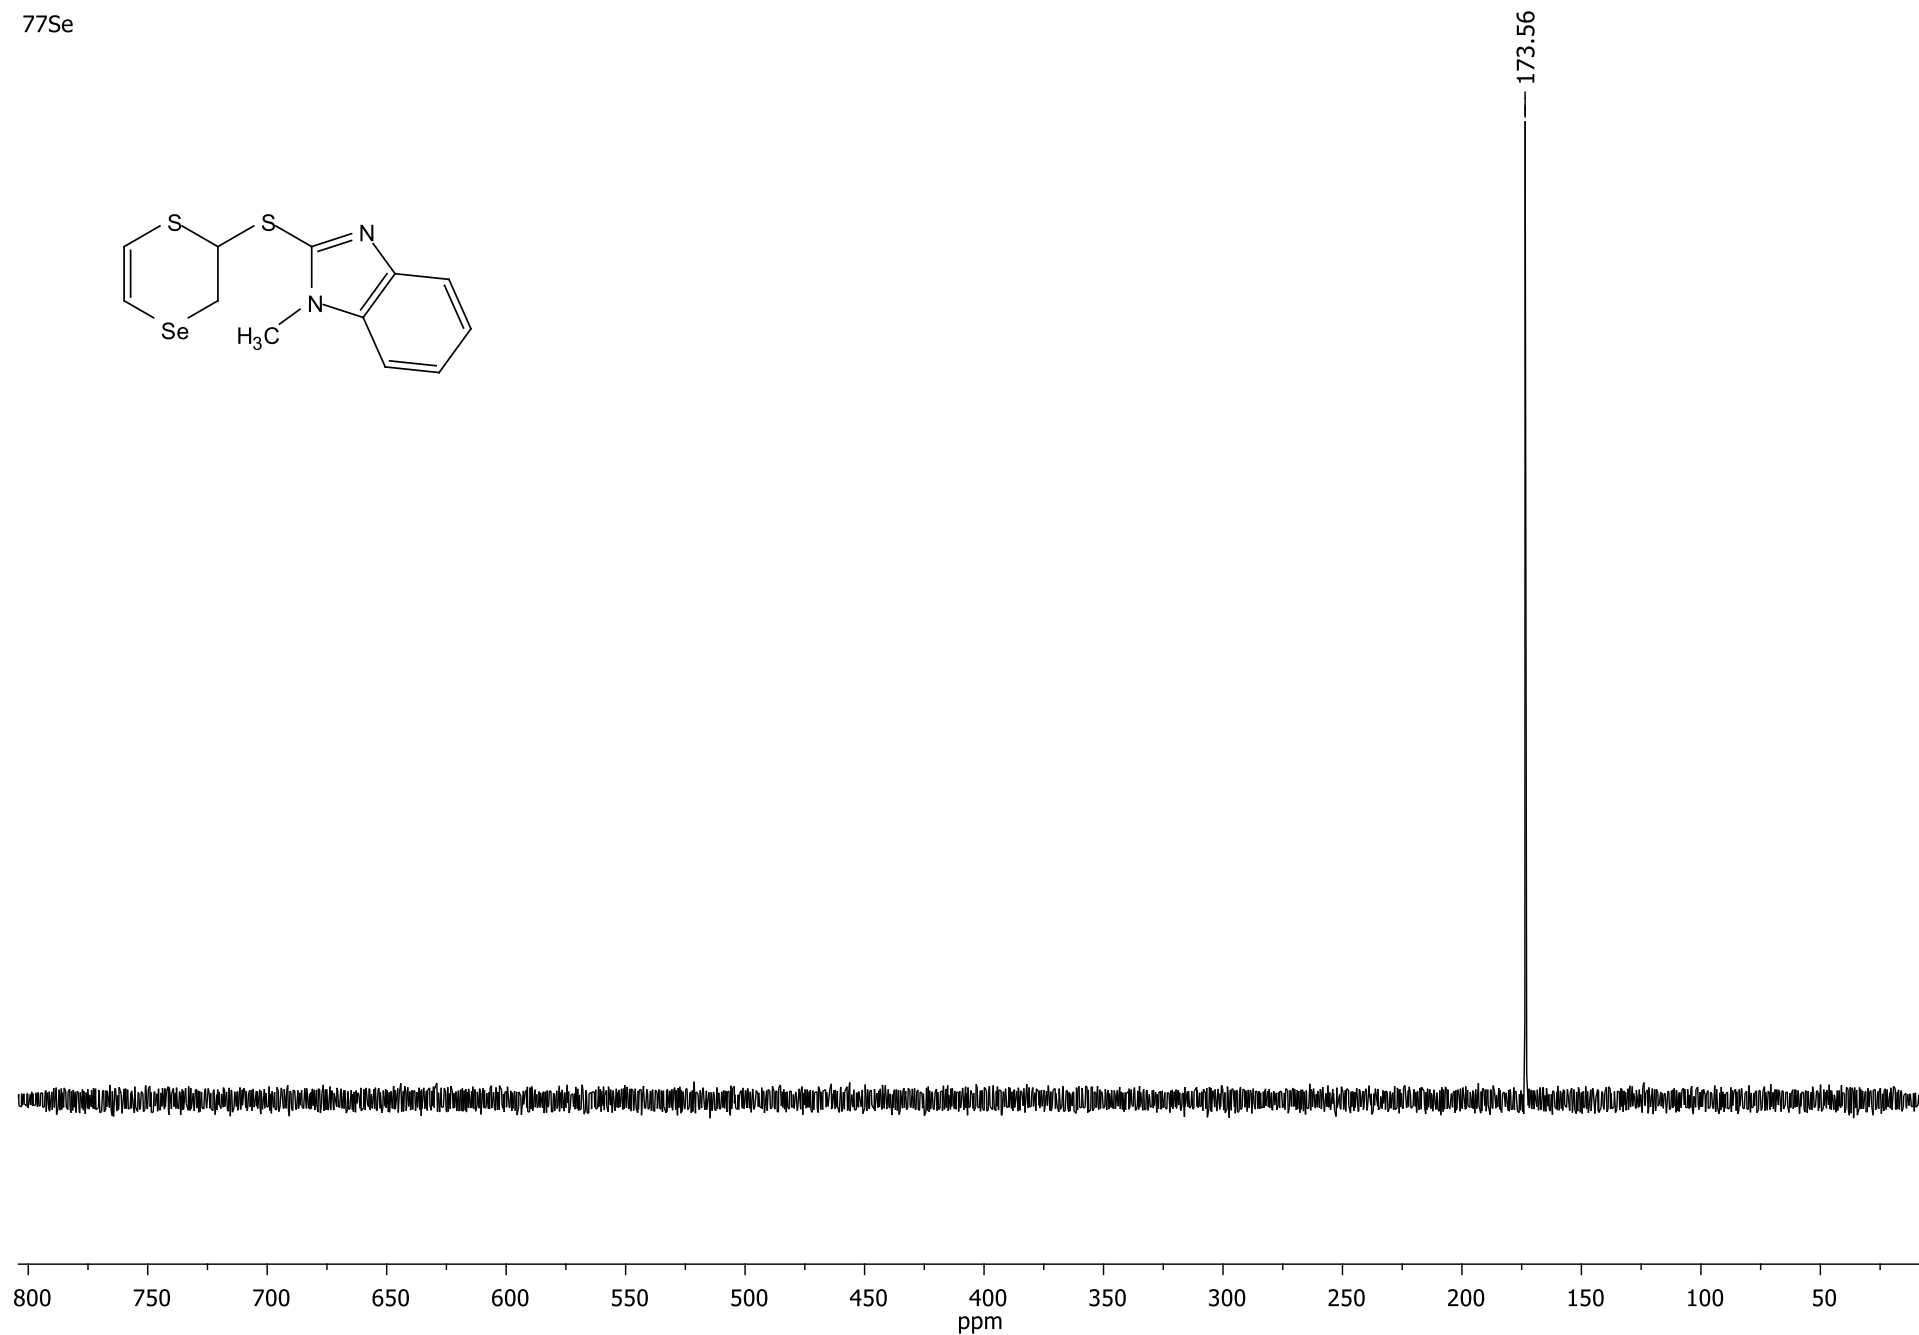

$^{77}\text{Se}$  NMR spectrum of 2-(2,3-dihydro-1,4-thiaselenin-2-ylsulfanyl)-1-methyl-1H-1,3-benzimidazole (3b)

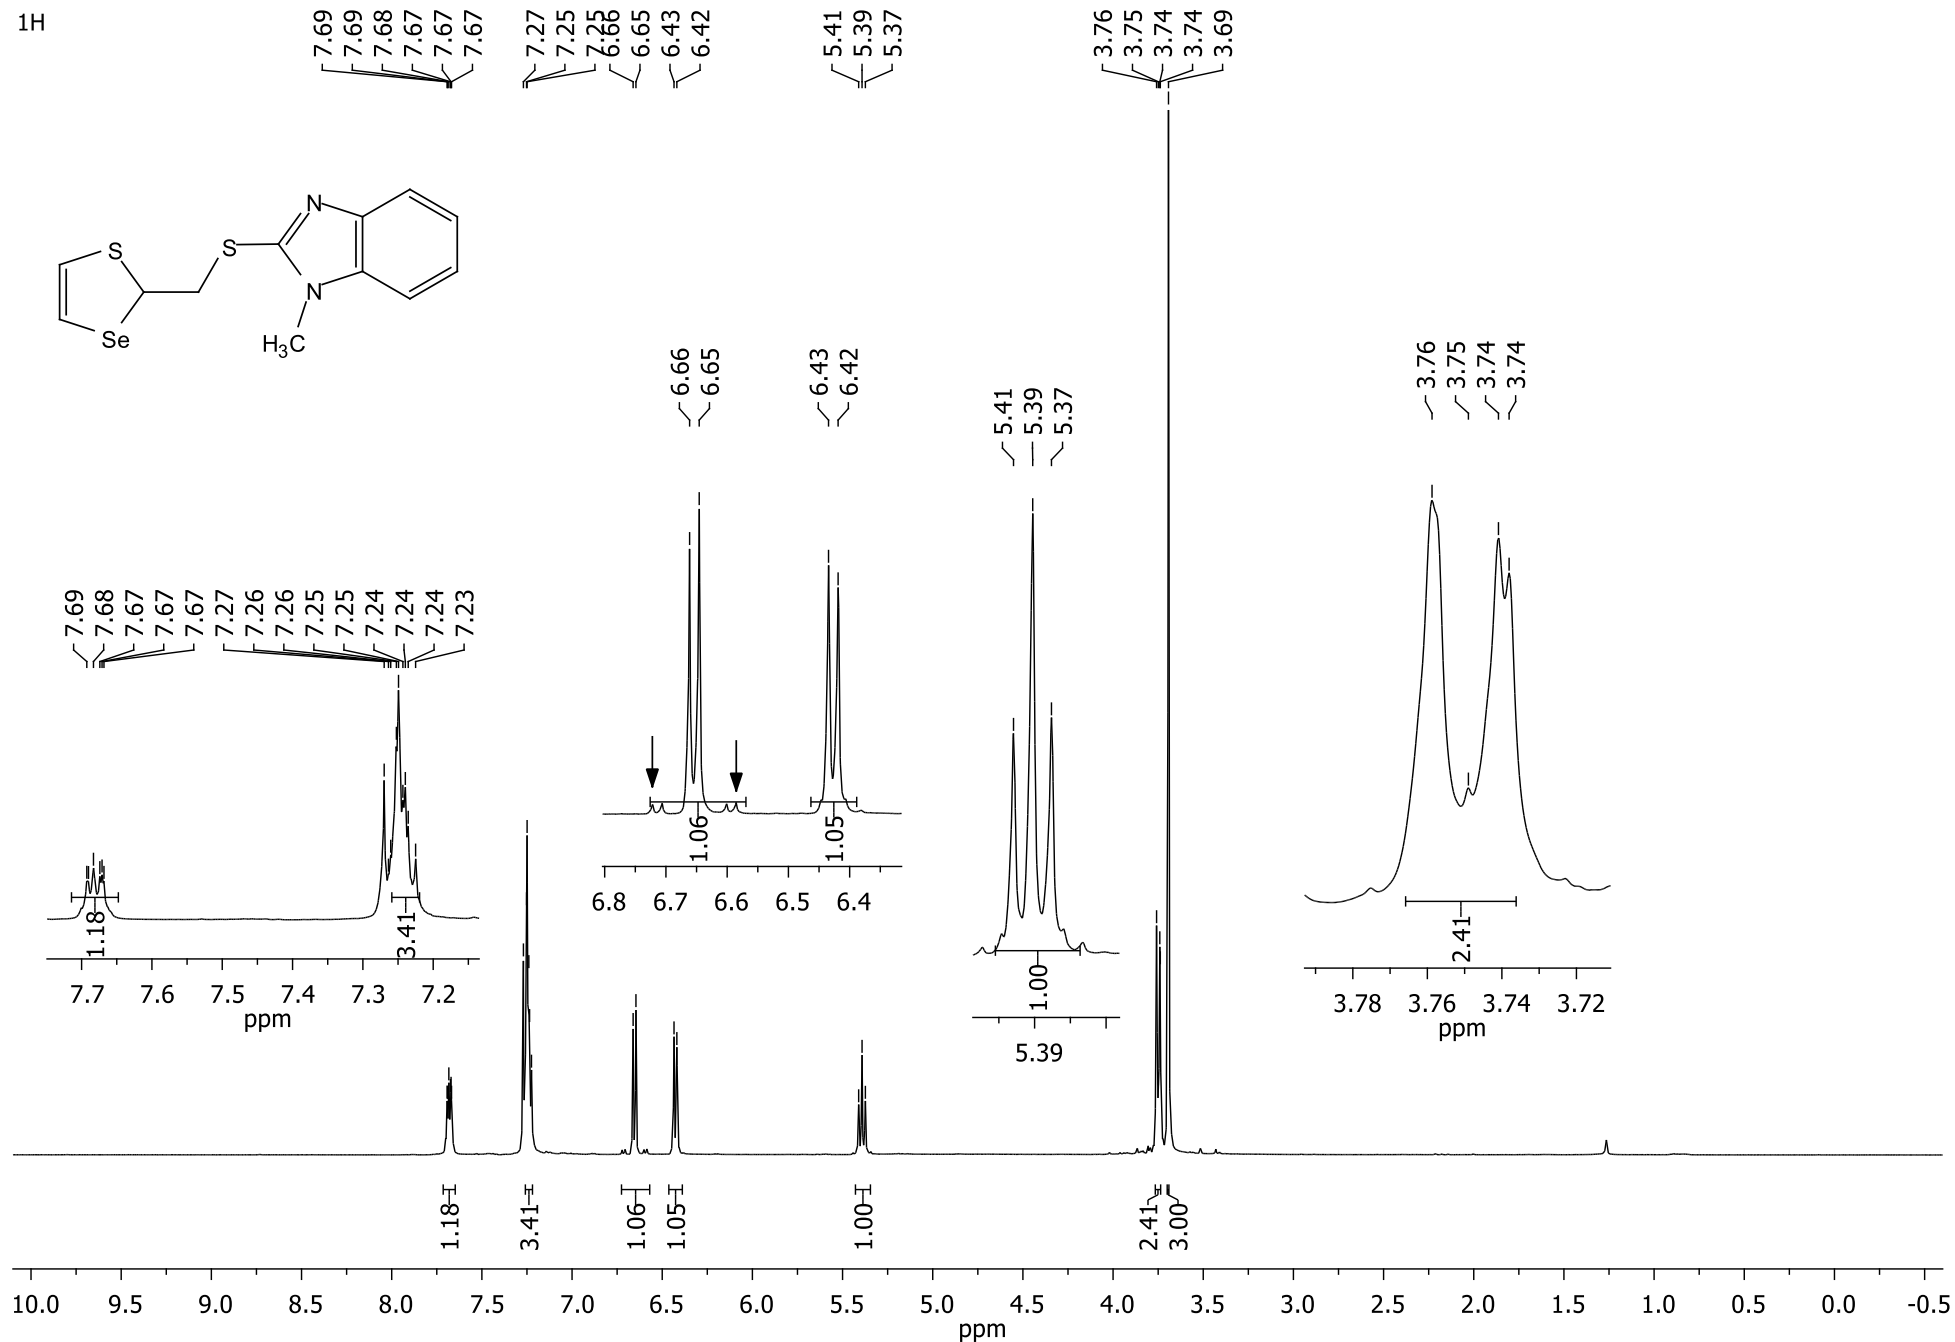

<sup>1</sup>H NMR spectrum of 1-methyl-2-[(1,3-thiaselenol-2-ylmethyl)sulfanyl]-1H-1,3-benzimidazole (4b)

13C

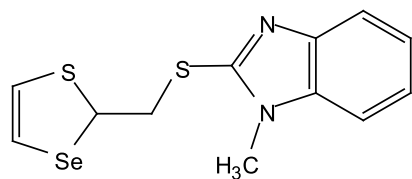

150.62  
142.65  
136.55  
122.12  
122.09  
119.75  
118.01  
113.83  
108.54  
77.00  
46.86  
40.86  
30.08

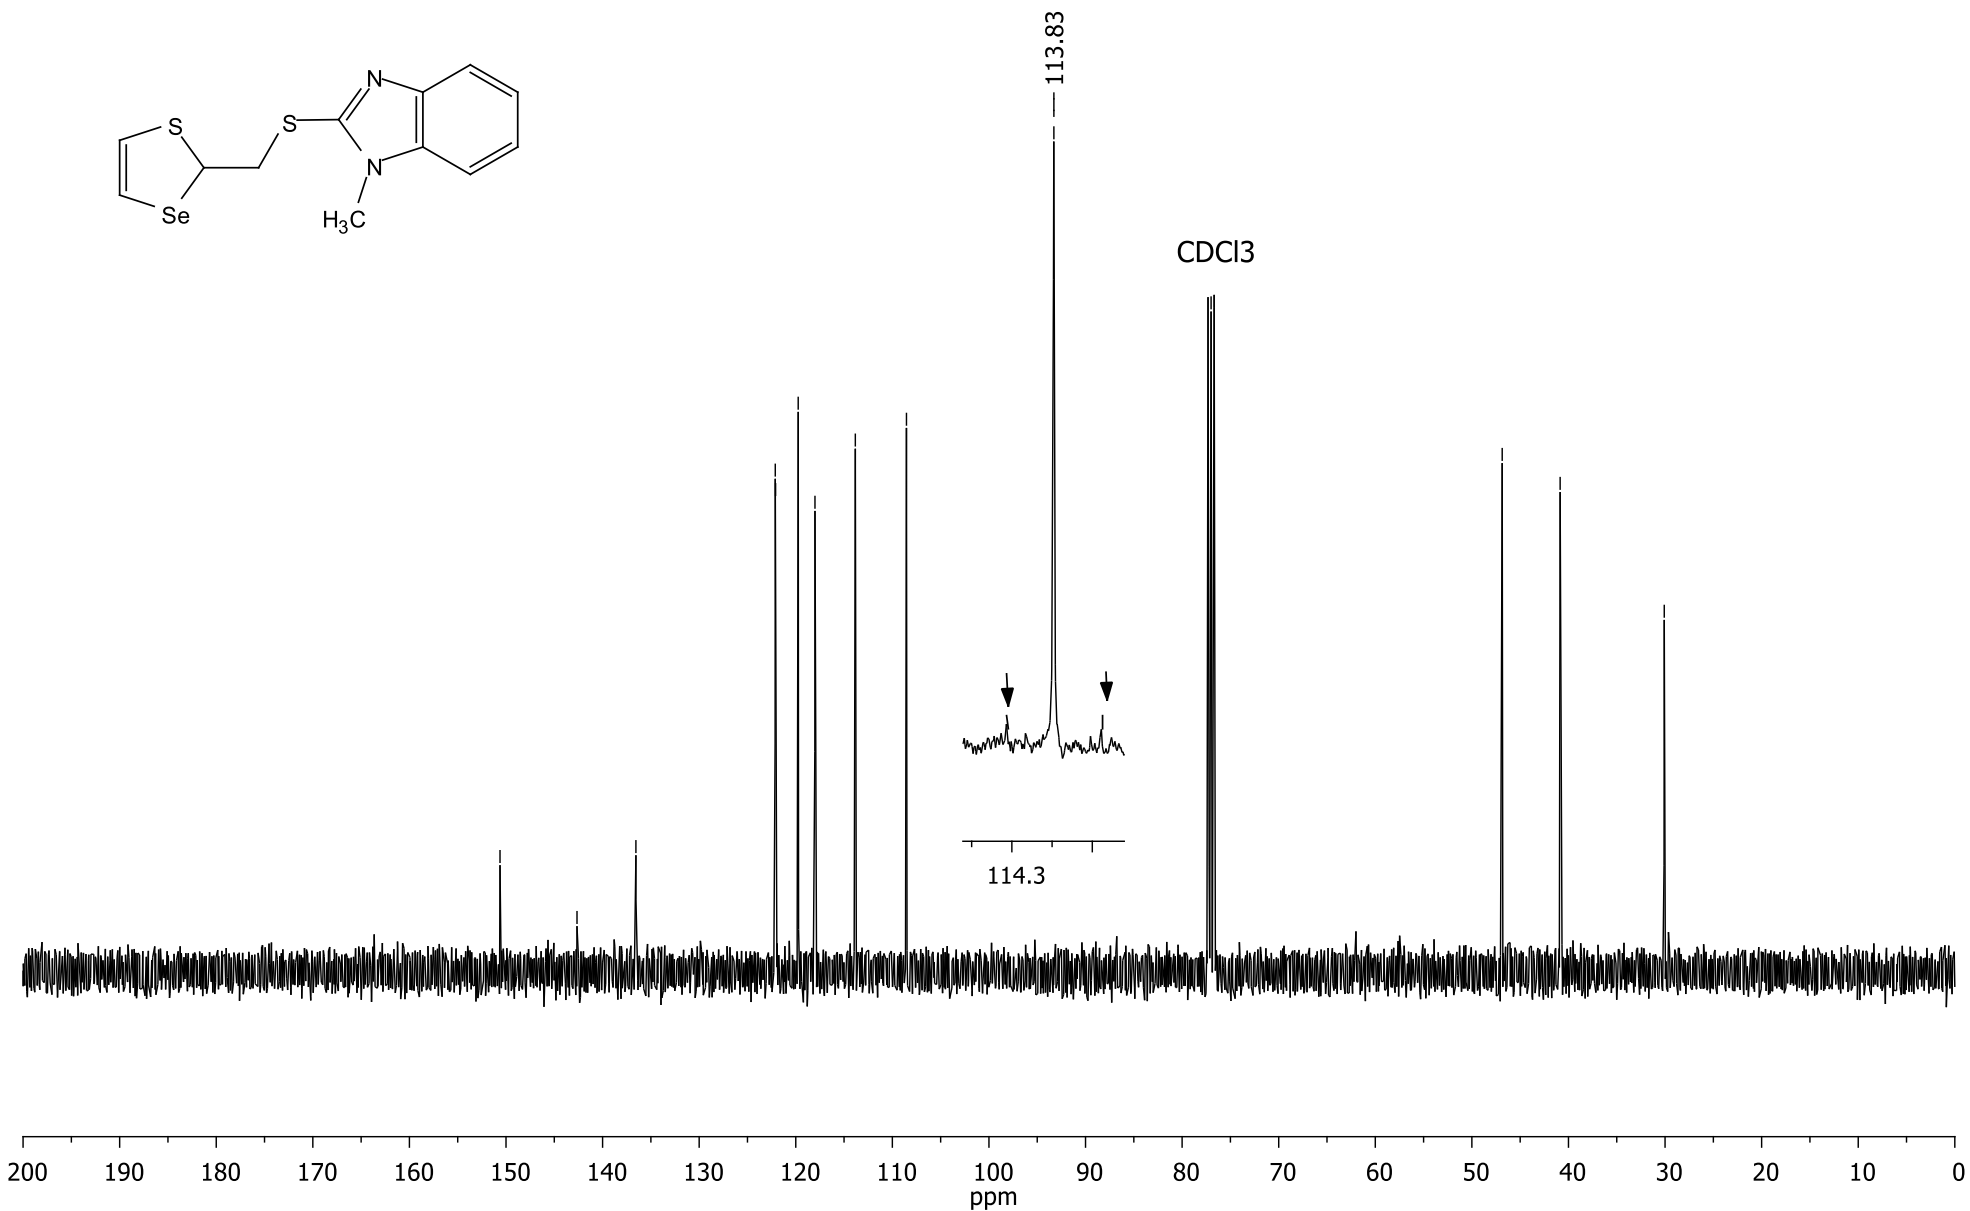

<sup>13</sup>C NMR spectrum of 1-methyl-2-[(1,3-thiaselenol-2-ylmethyl)sulfanyl]-1H-1,3-benzimidazole (4b)

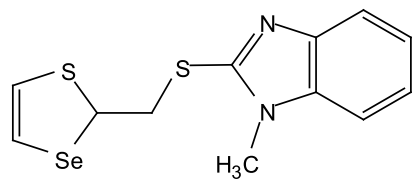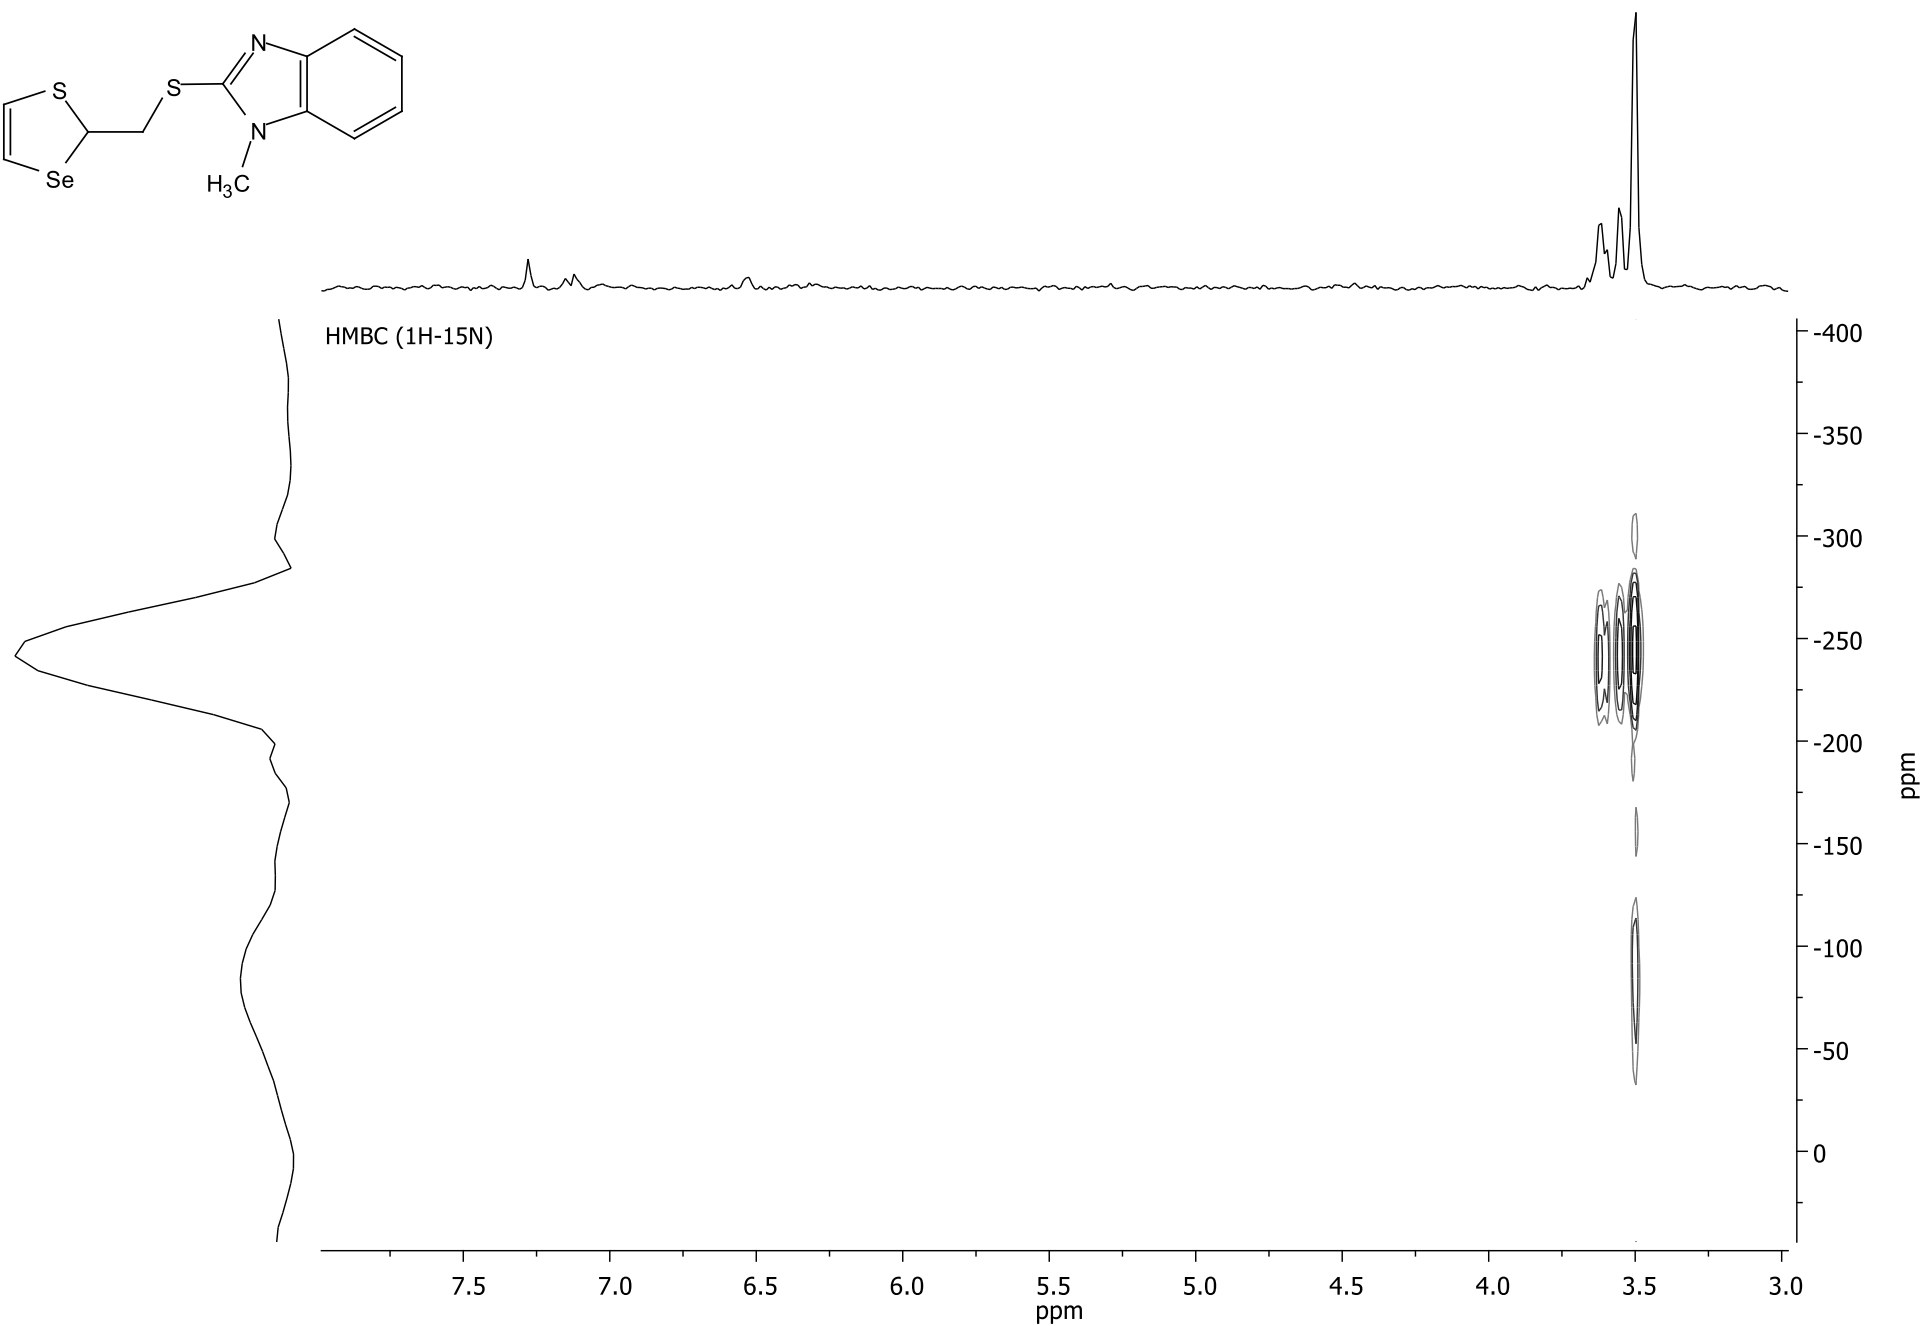

HMBC (<sup>1</sup>H-<sup>15</sup>N) NMR spectrum of 1-methyl-2-[(1,3-thiaselenol-2-ylmethyl)sulfanyl]-1H-1,3-benzimidazole (4b)

$^{77}\text{Se}$

— 516.17

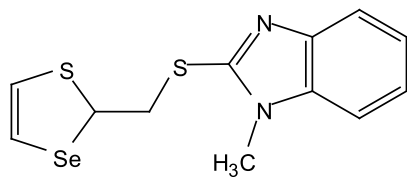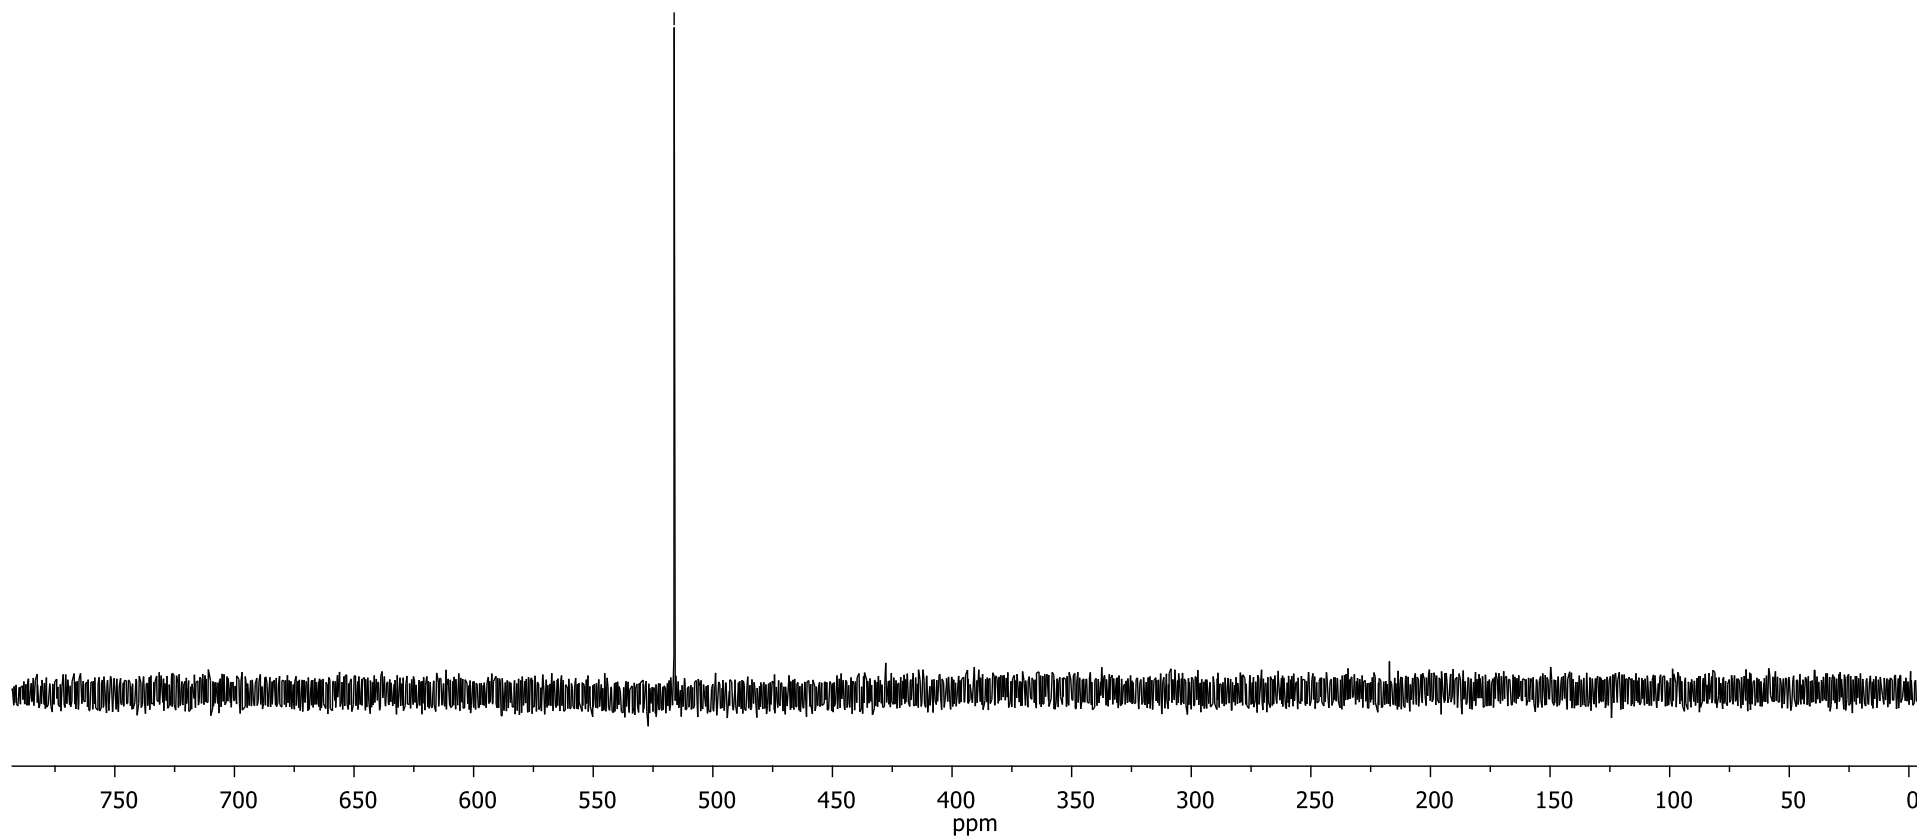

$^{77}\text{Se}$  NMR spectrum of 1-methyl-2-[(1,3-thiaselenol-2-ylmethyl)sulfanyl]-1*H*-1,3-benzimidazole (4b)

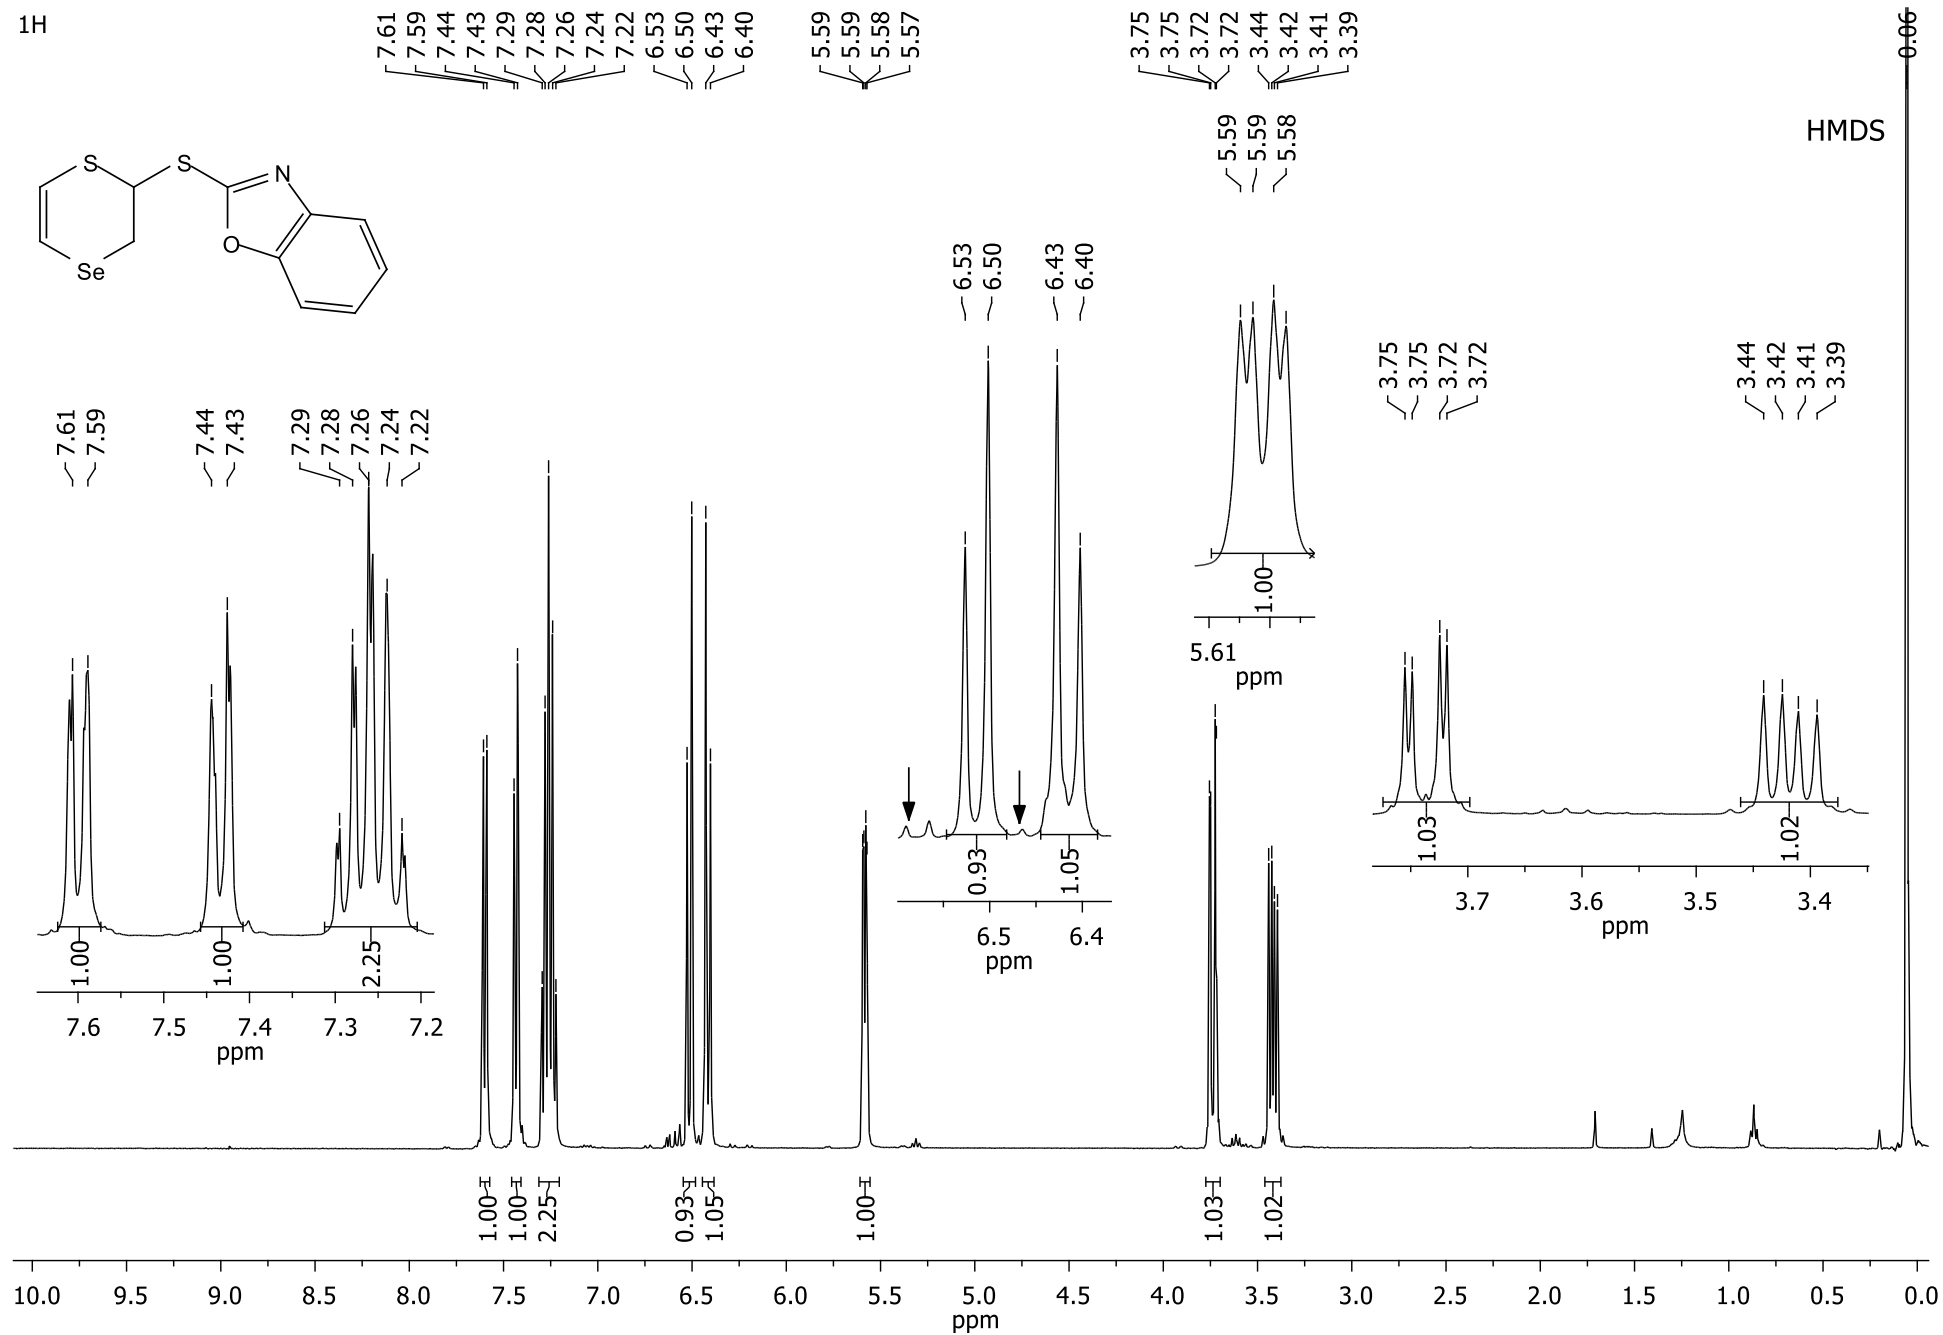

**<sup>1</sup>H NMR spectrum of 2-(2,3-dihydro-1,4-thiaselenin-2-ylsulfanyl)-1,3-benzoxazole (3c)**



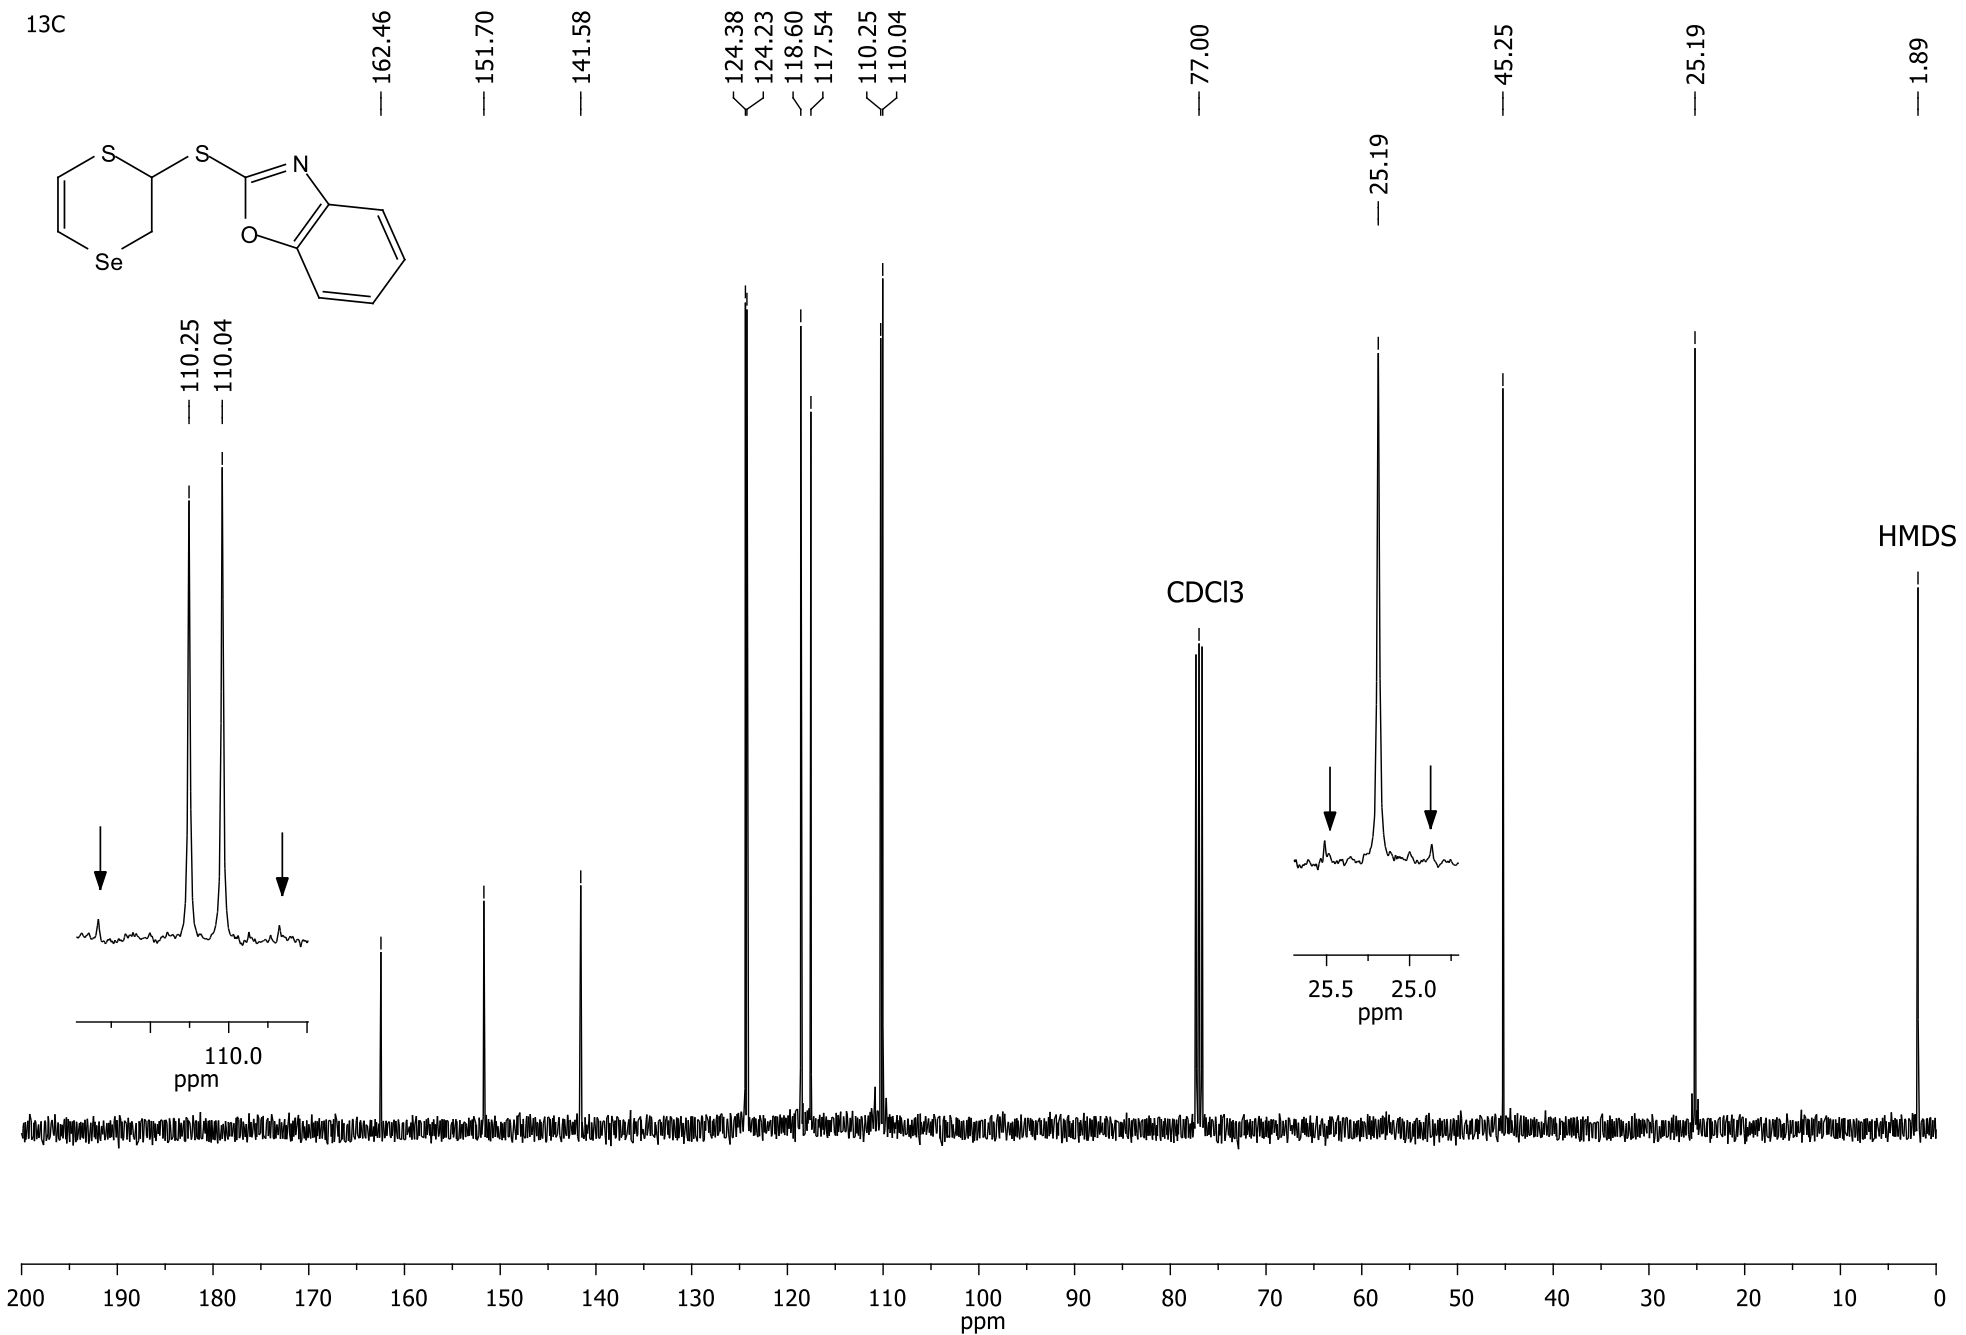

<sup>13</sup>C NMR spectrum of 2-(2,3-dihydro-1,4-thiaselenin-2-ylsulfanyl)-1,3-benzoxazole (3c)

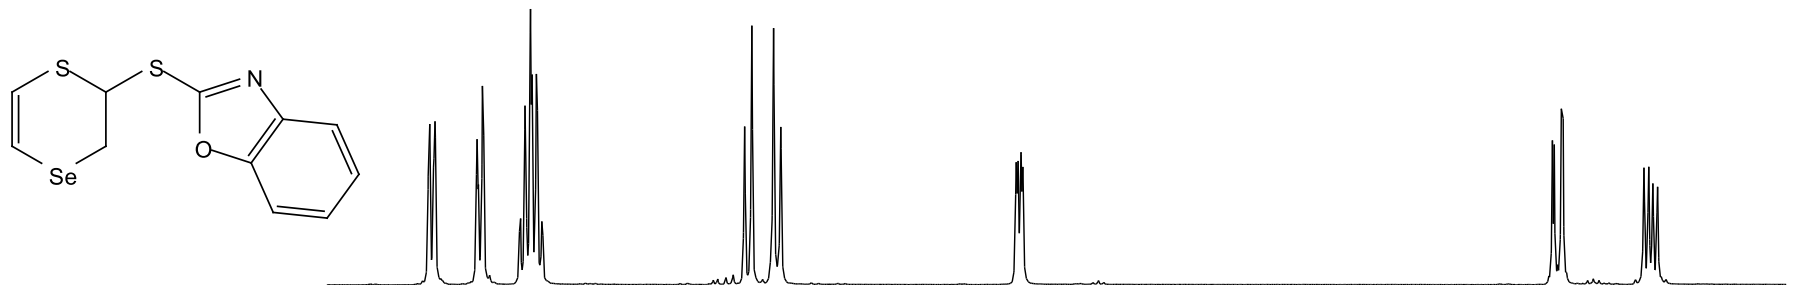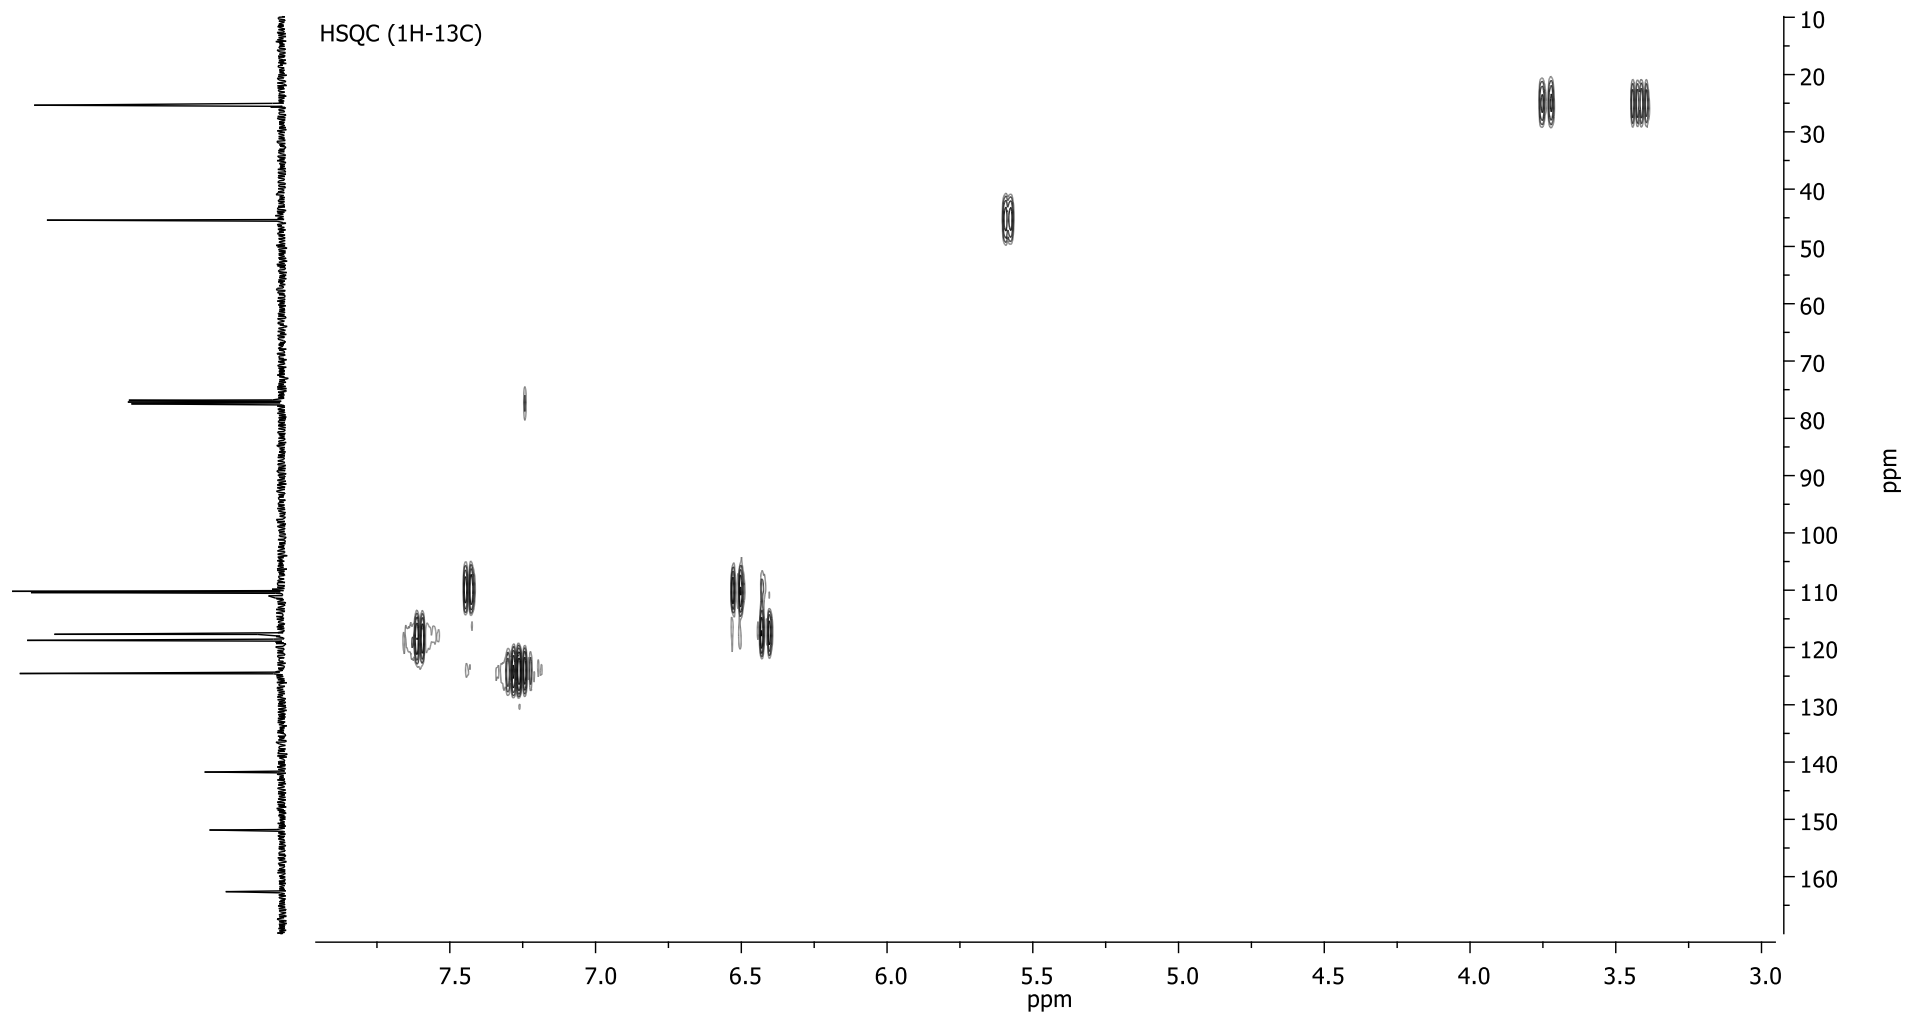

HSQC (<sup>1</sup>H-<sup>13</sup>C) NMR spectrum of 2-(2,3-dihydro-1,4-thiaselenin-2-ylsulfanyl)-1,3-benzoxazole (3c)

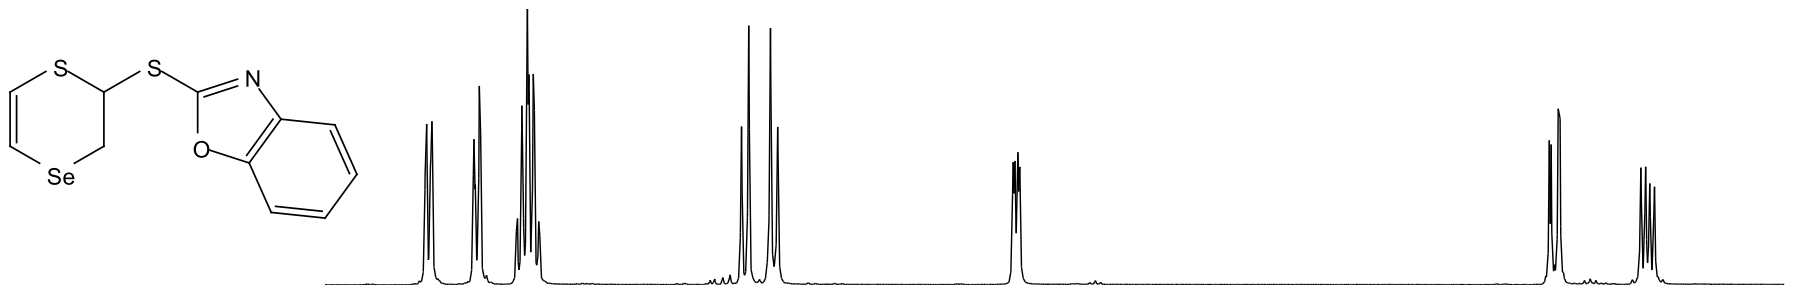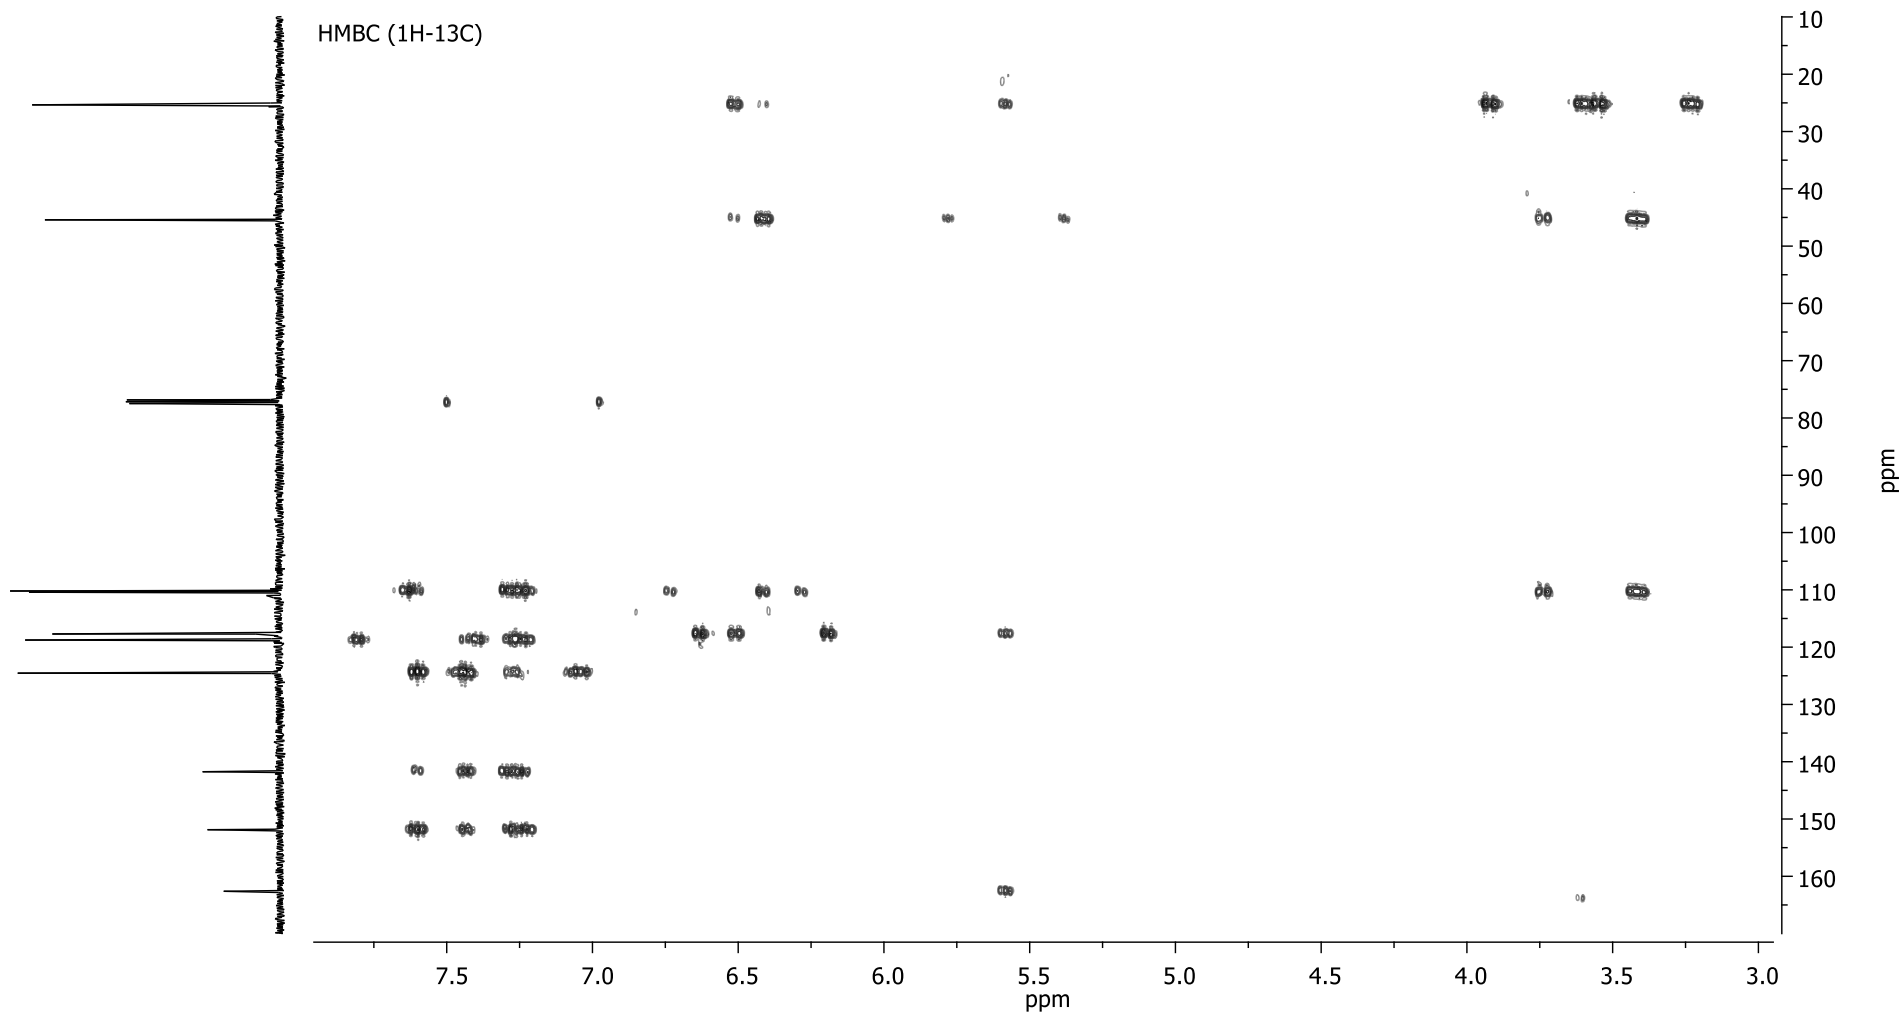

HMBC ( $^1\text{H}$ - $^{13}\text{C}$ ) NMR spectrum of 2-(2,3-dihydro-1,4-thiaselenin-2-ylsulfanyl)-1,3-benzoxazole (3c)

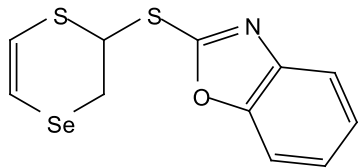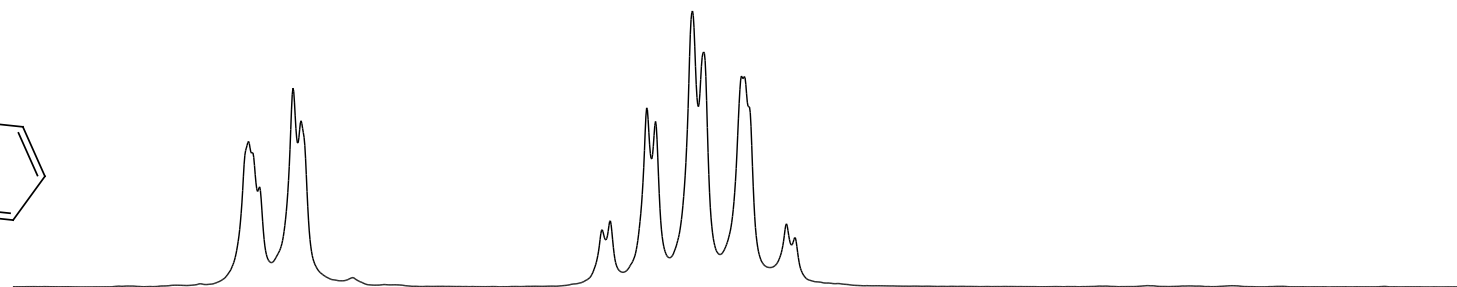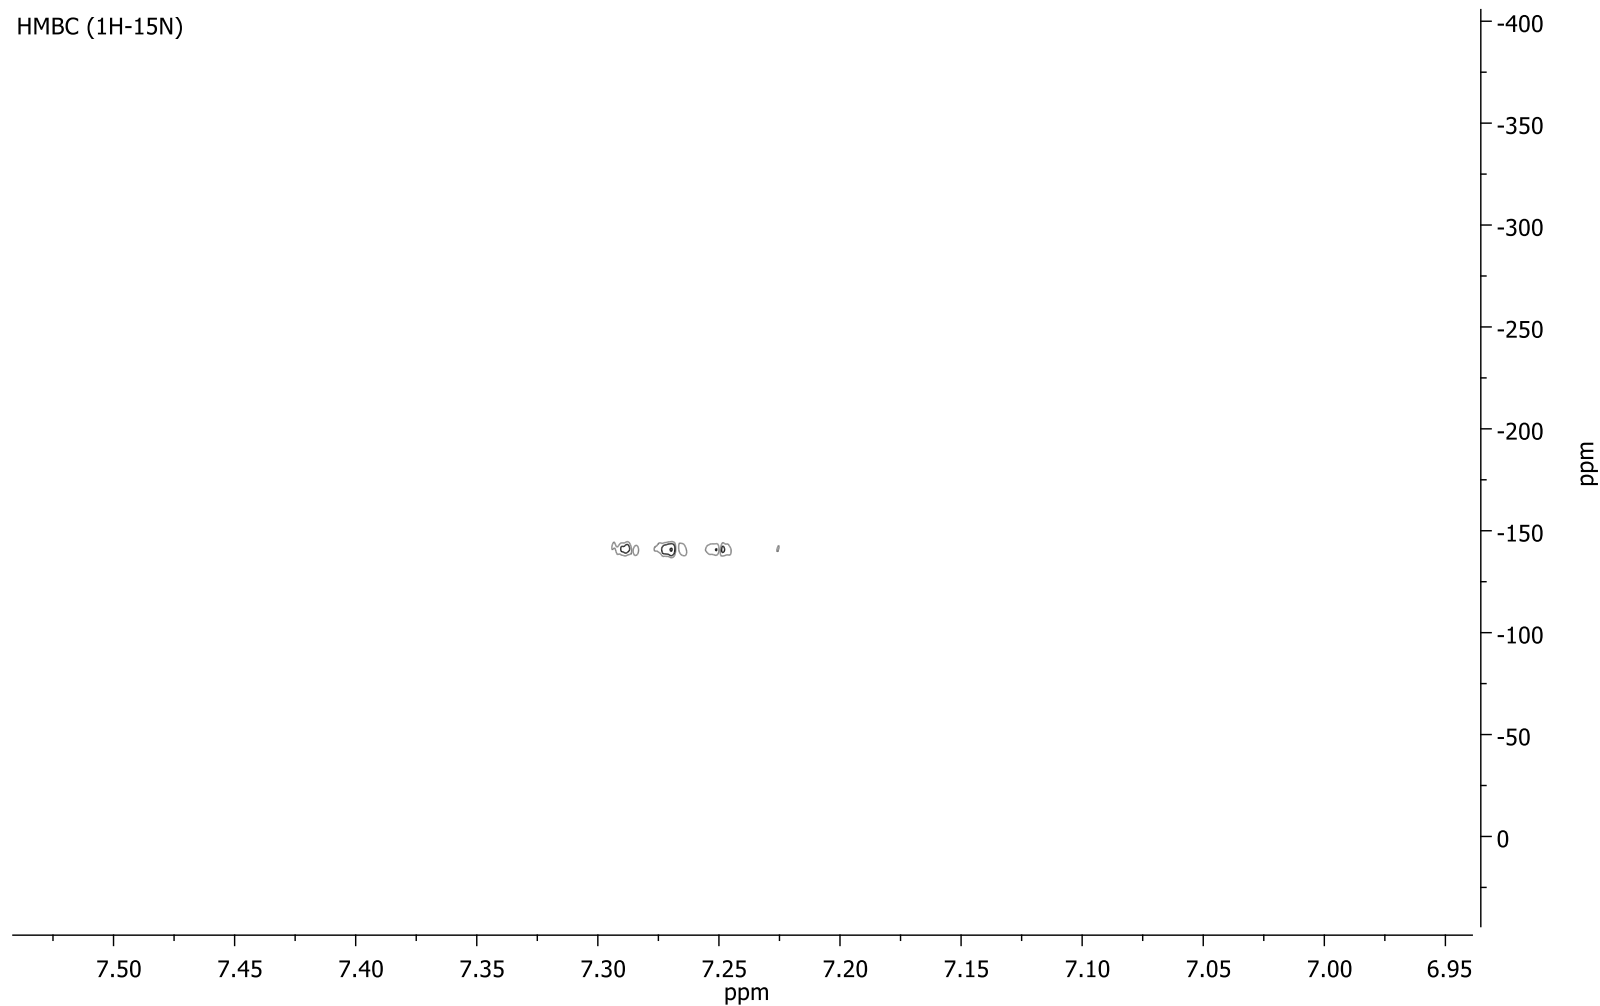

**HMBC ( $^1\text{H}$ - $^{15}\text{N}$ ) NMR spectrum of 2-(2,3-dihydro-1,4-thiaselenin-2-ylsulfanyl)-1,3-benzoxazole (3c)**

$^{77}\text{Se}$

— 174.97

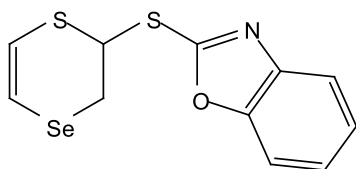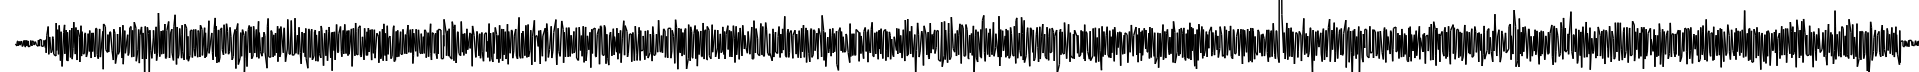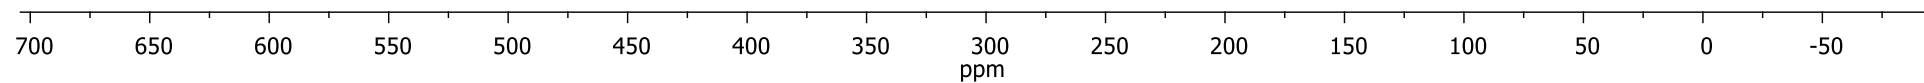

$^{77}\text{Se}$  NMR spectrum of 2-(2,3-dihydro-1,4-thiaselenin-2-ylsulfanyl)-1,3-benzoxazole (3c)

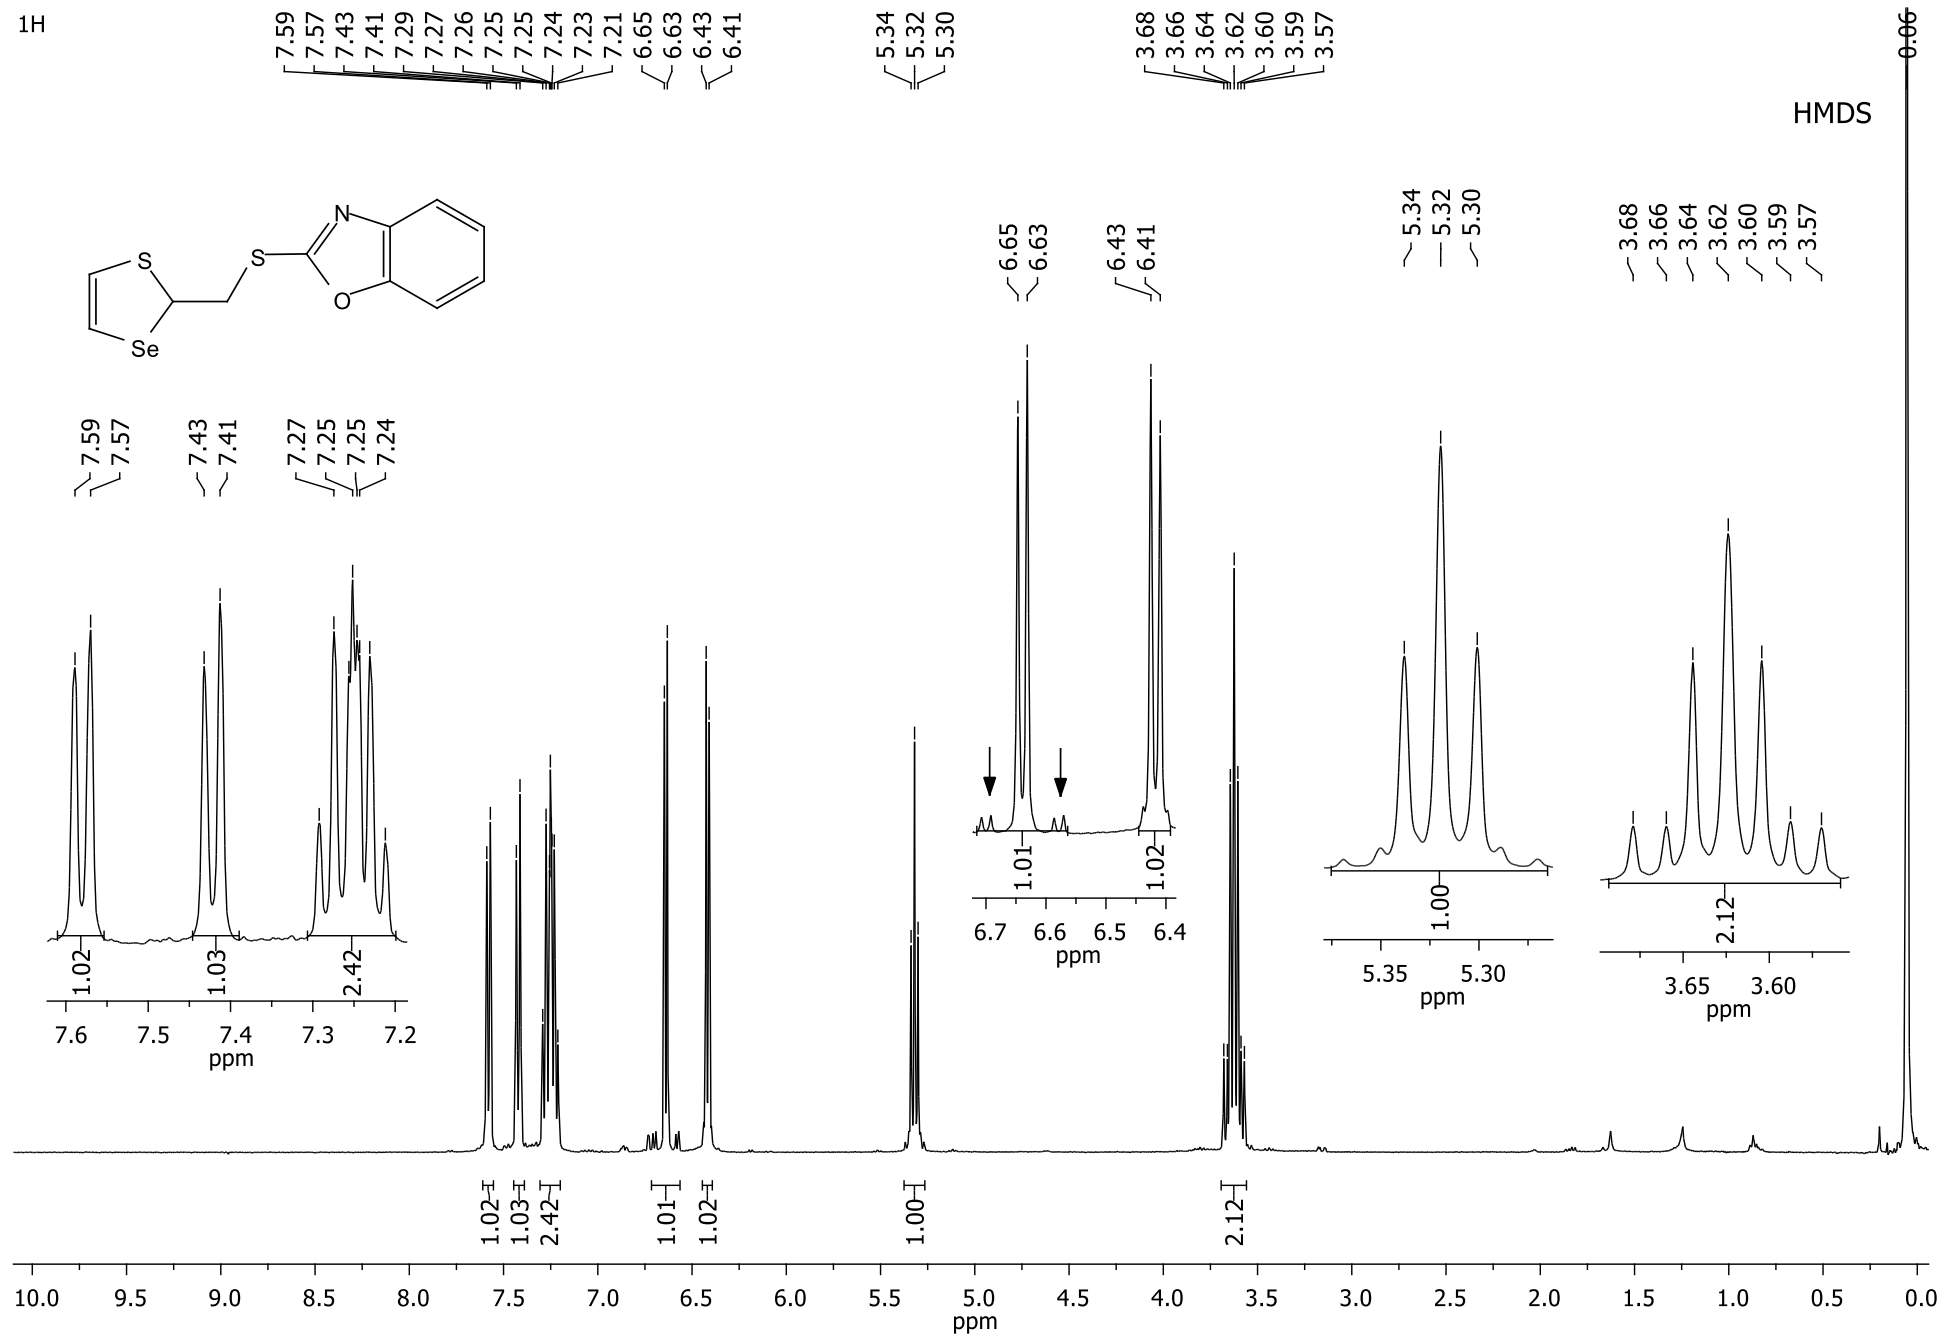

<sup>1</sup>H NMR spectrum of 2-[(1,3-thiaselenol-2-ylmethyl)sulfanyl]-1,3-benzoxazole (4c)

13C

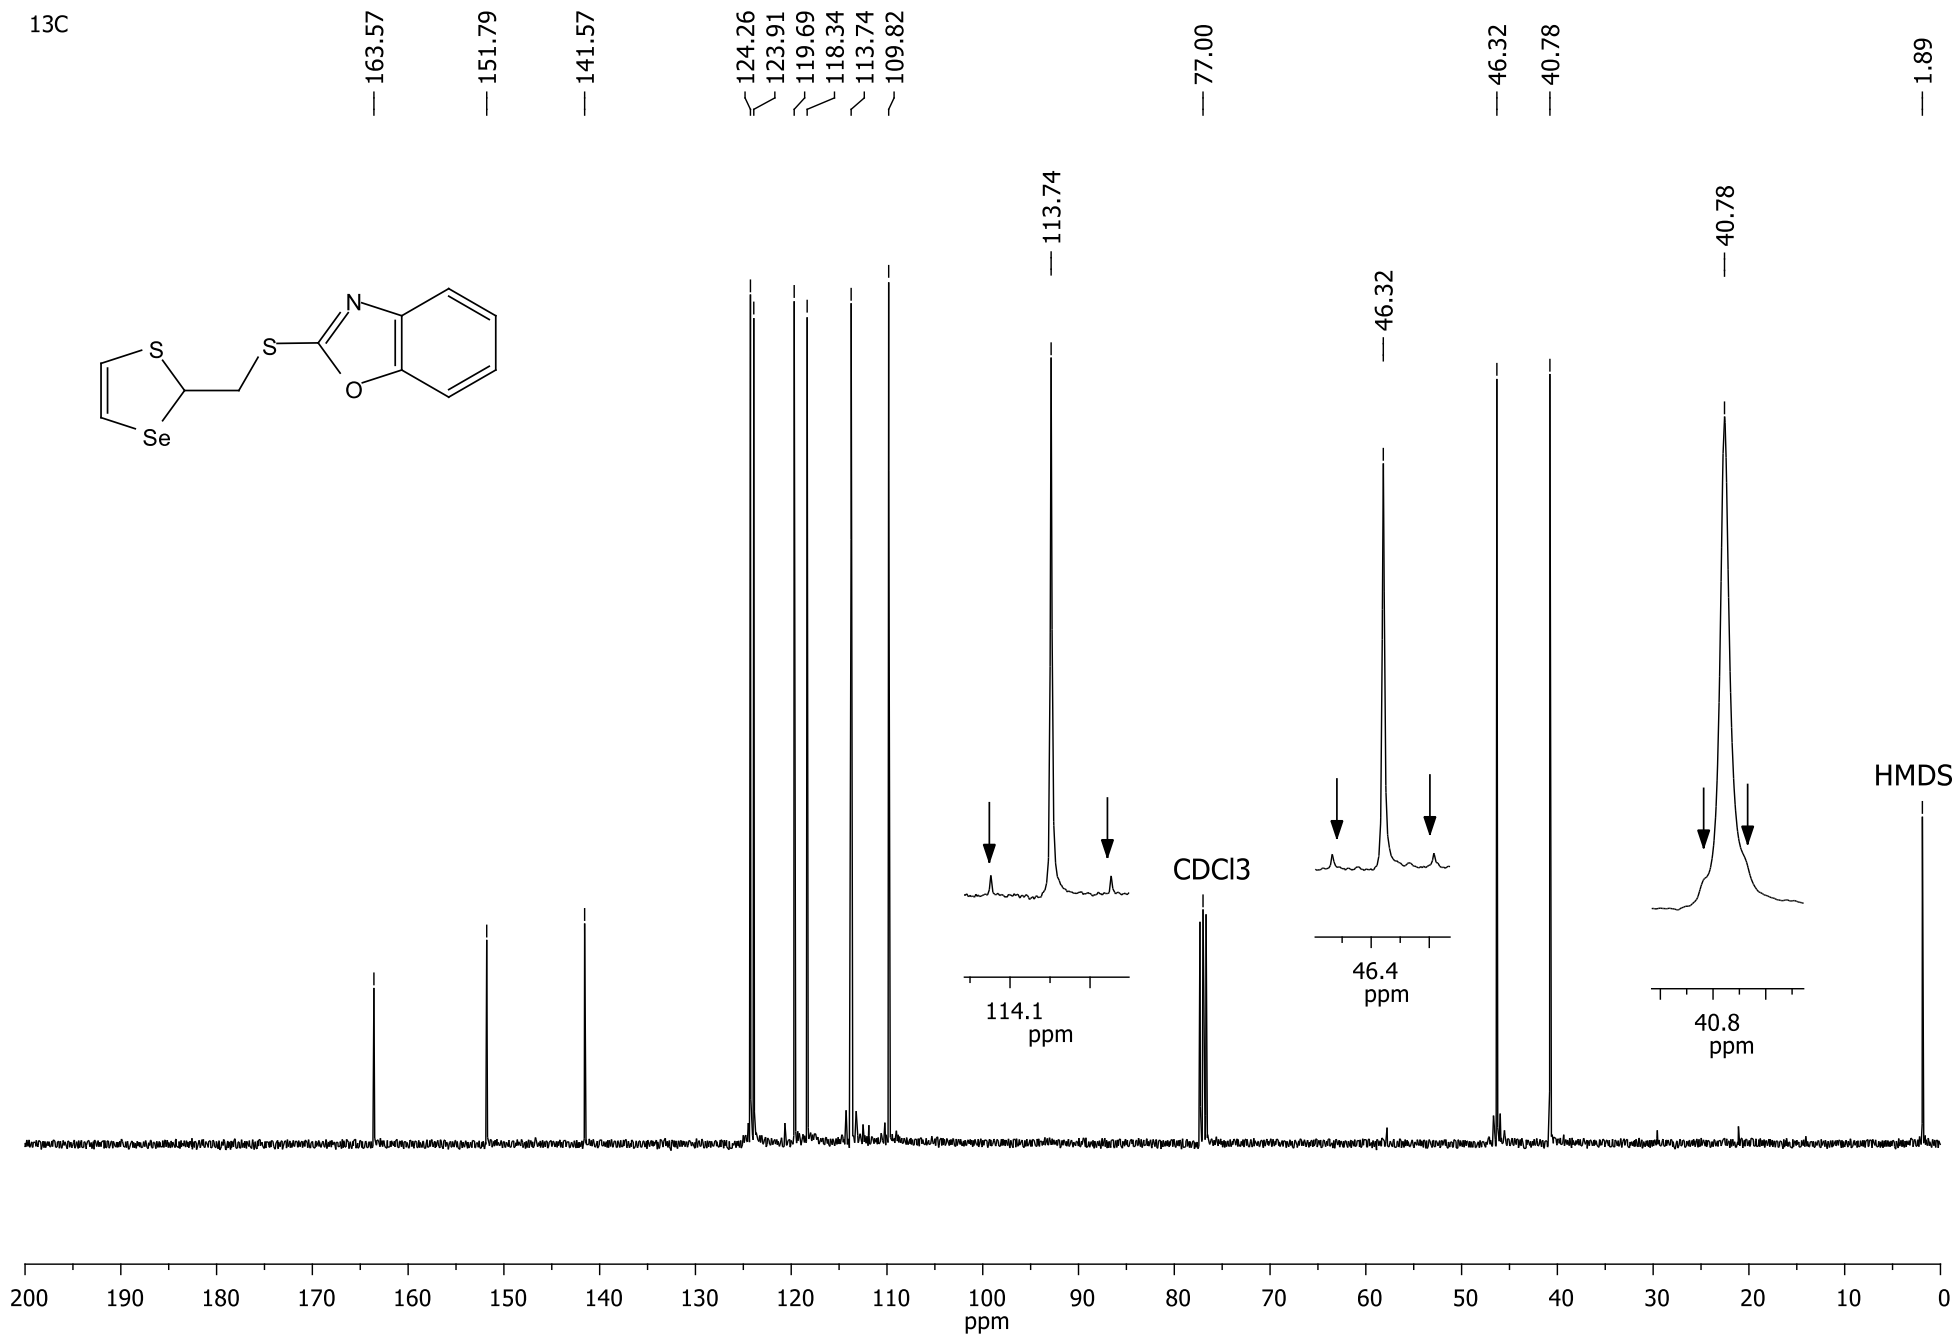

<sup>13</sup>C NMR spectrum of 2-[(1,3-thiaselenol-2-ylmethyl)sulfanyl]-1,3-benzoxazole (4c)

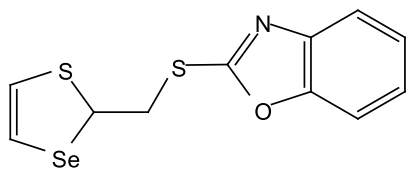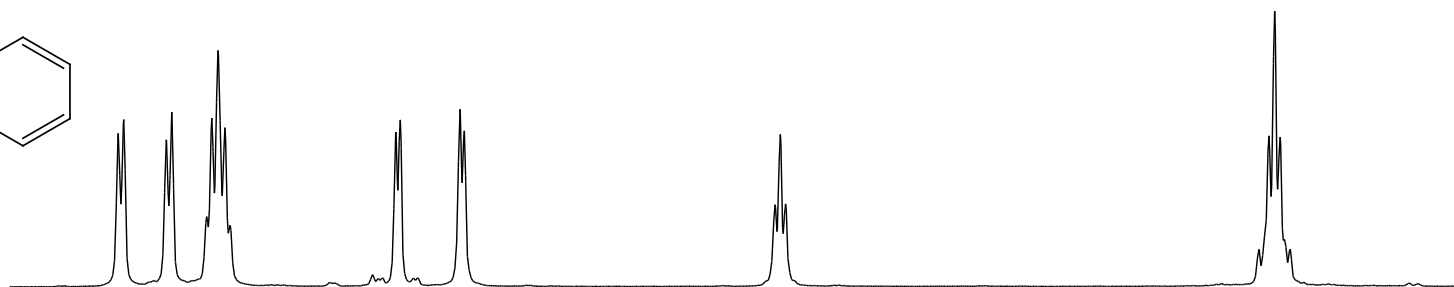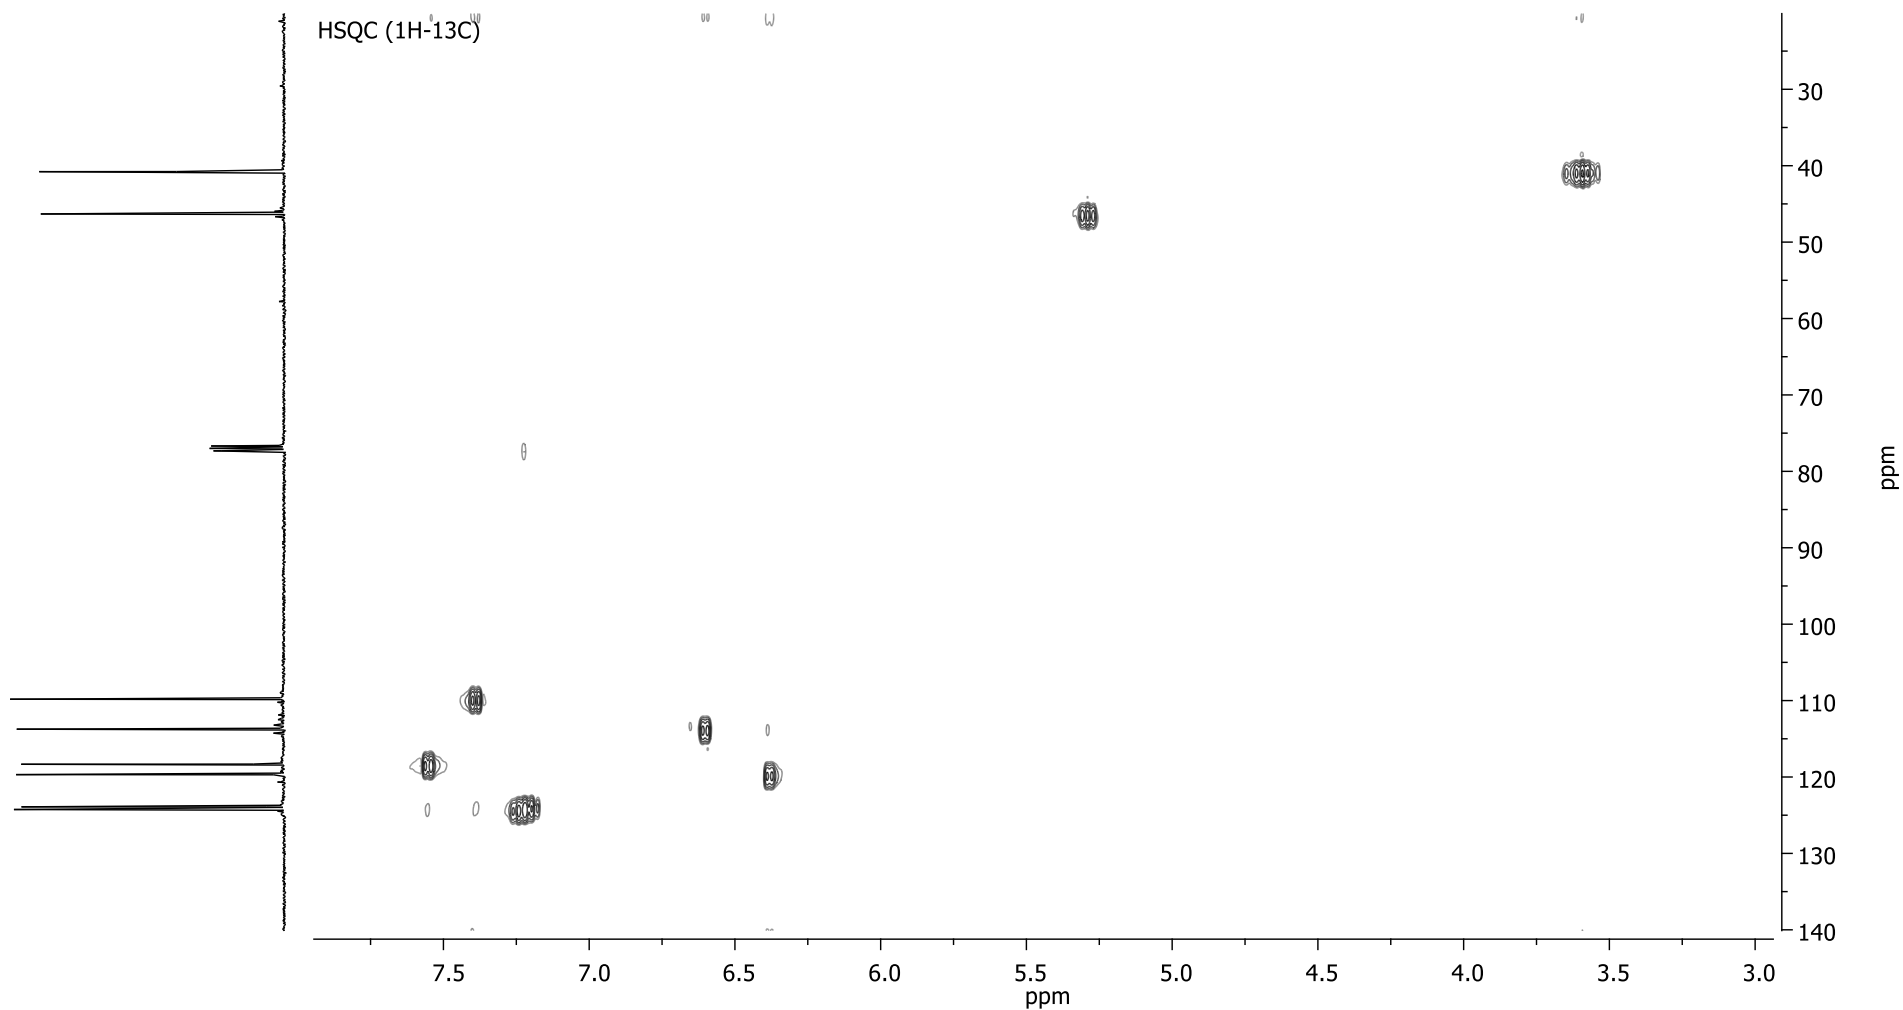

HSQC ( $^1\text{H}$ - $^{13}\text{C}$ ) NMR spectrum of 2-[(1,3-thiaselenol-2-ylmethyl)sulfanyl]-1,3-benzoxazole (4c)



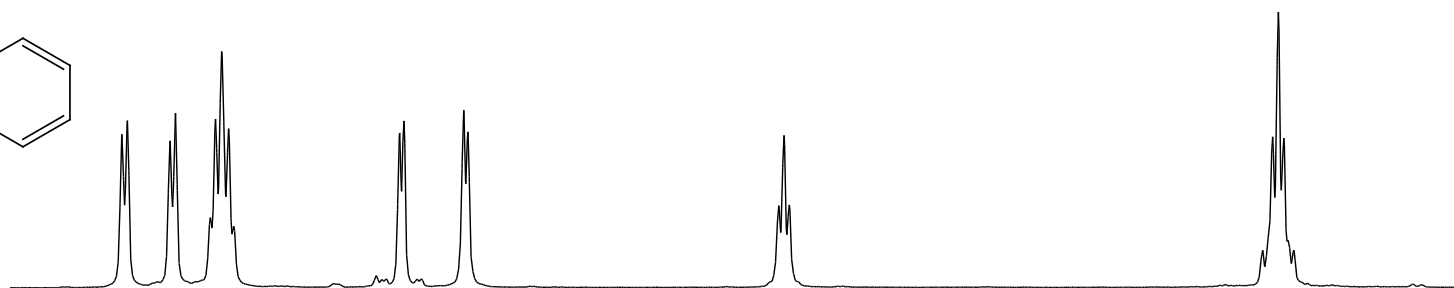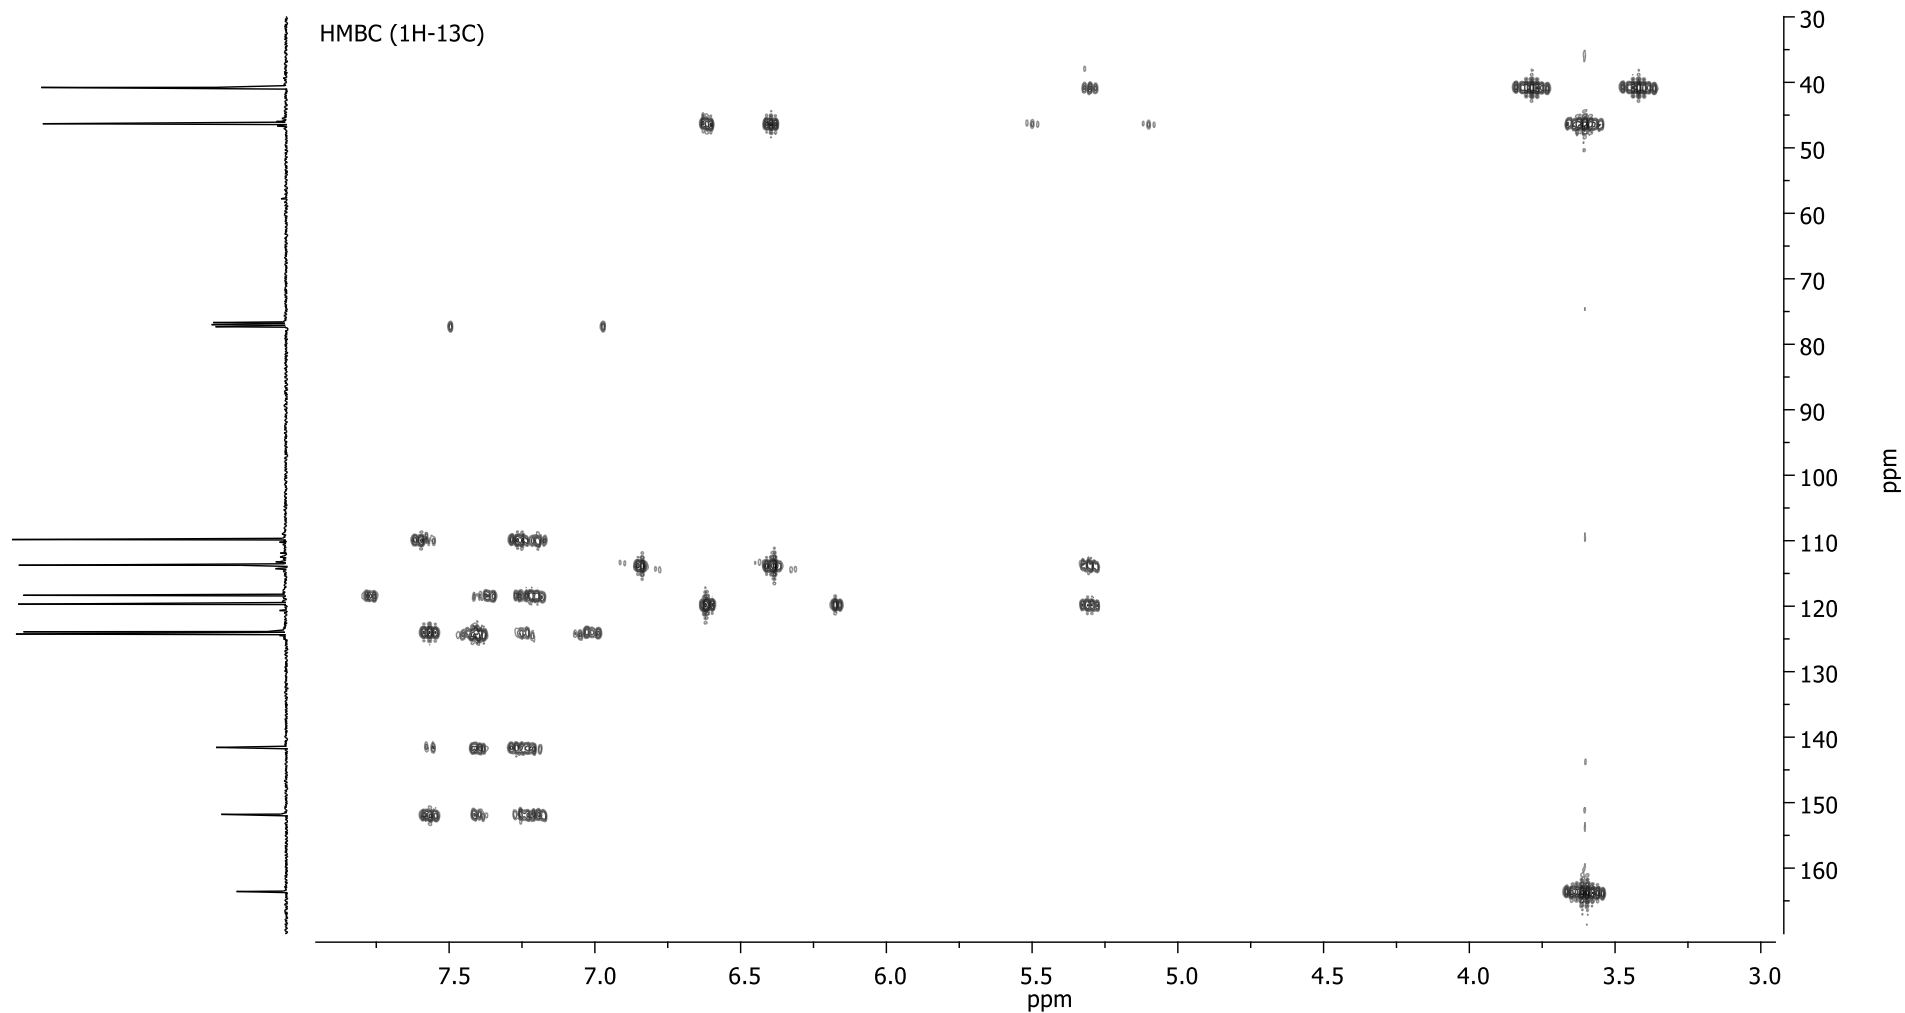

HMBC ( $^1\text{H}$ - $^{13}\text{C}$ ) NMR spectrum of 2-[(1,3-thiaselenol-2-ylmethyl)sulfanyl]-1,3-benzoxazole (4c)

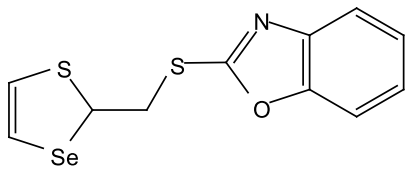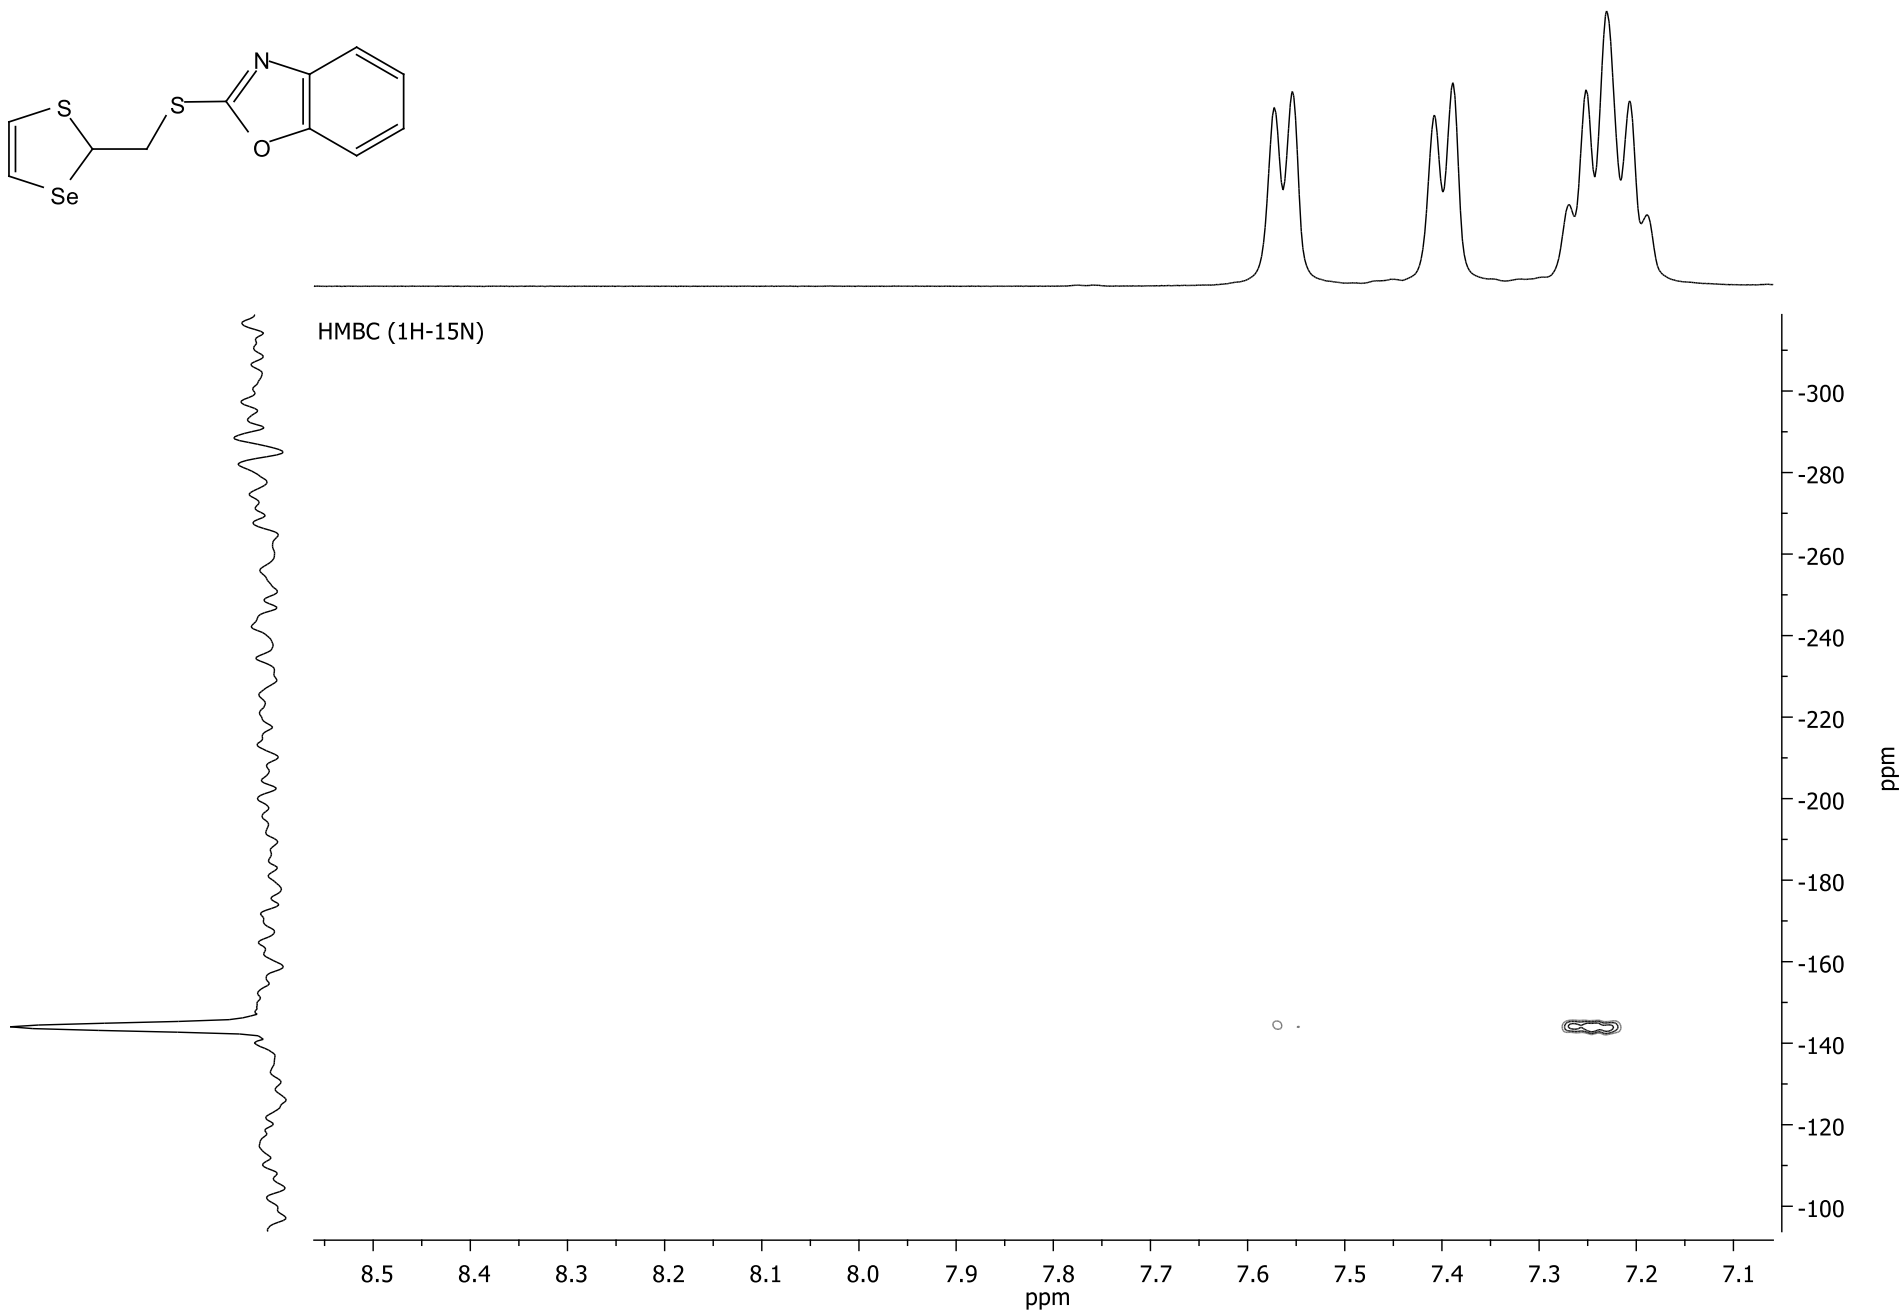

**HMBC ( $^1\text{H}$ - $^{15}\text{N}$ ) NMR spectrum of 2-[(1,3-thiaselenol-2-ylmethyl)sulfanyl]-1,3-benzoxazole (4c)**

$^{77}\text{Se}$

— 519.18

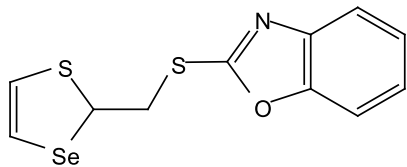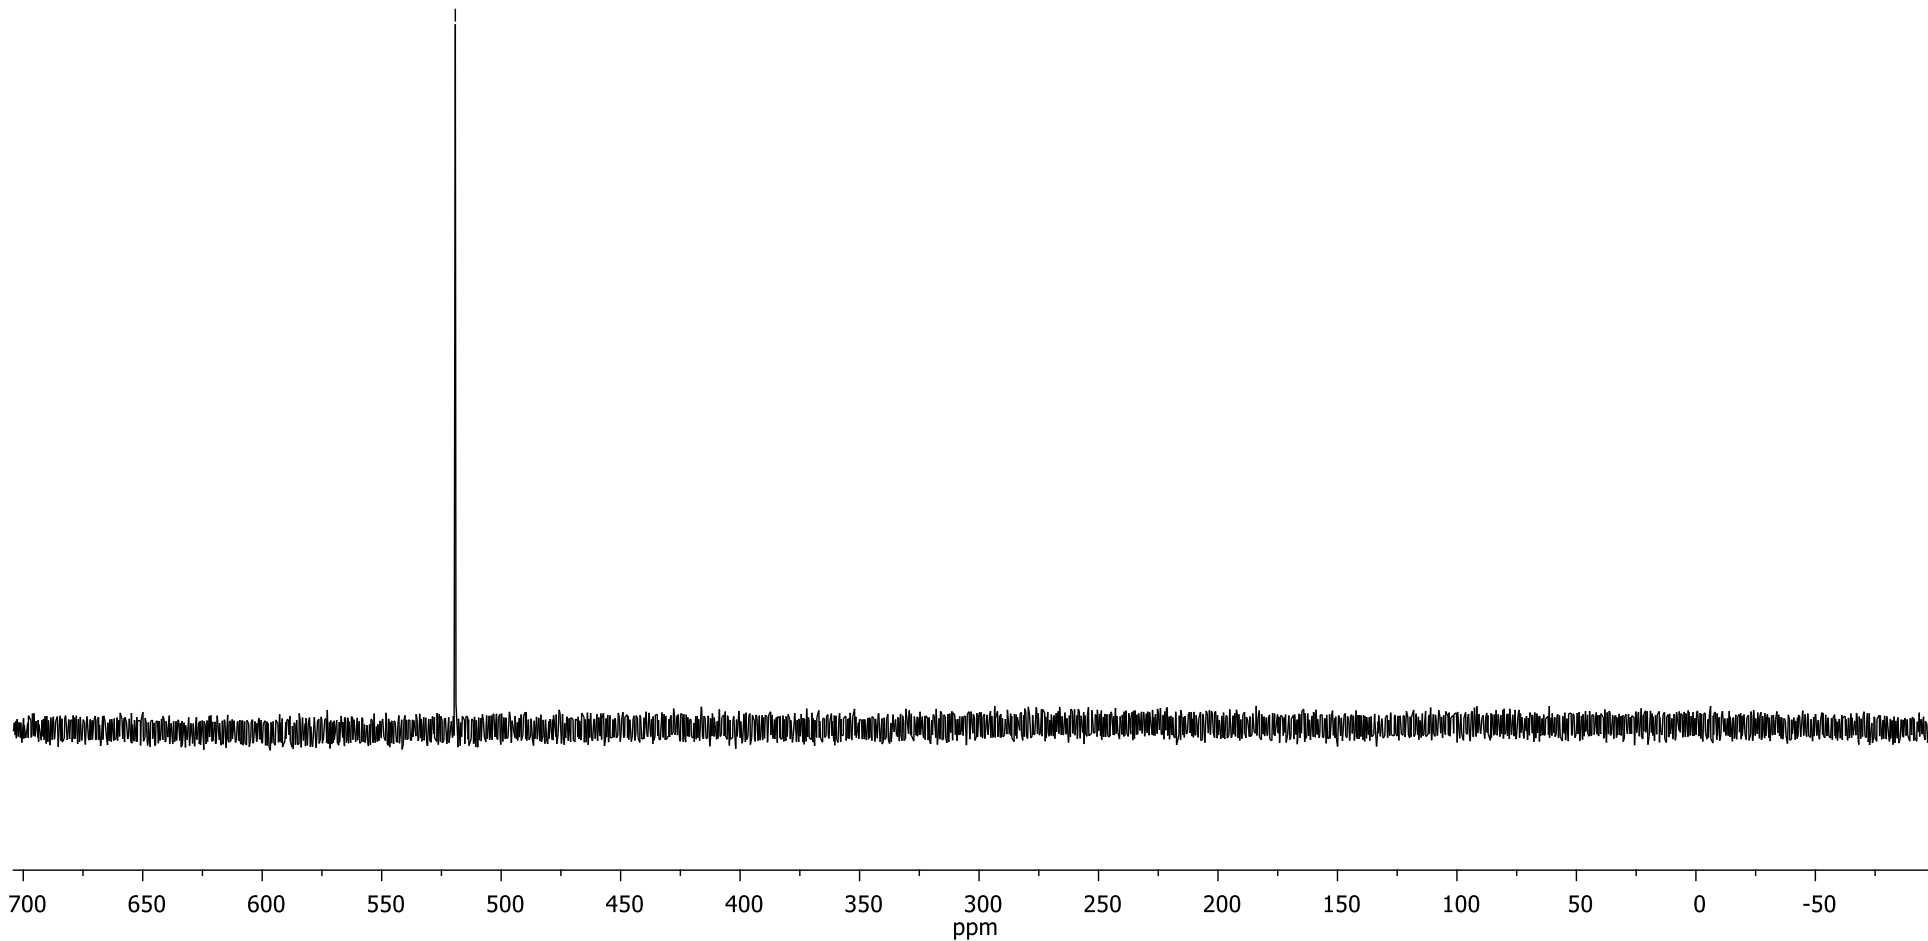

$^{77}\text{Se}$  NMR spectrum of 2-[(1,3-thiaselenol-2-ylmethyl)sulfanyl]-1,3-benzoxazole (4c)

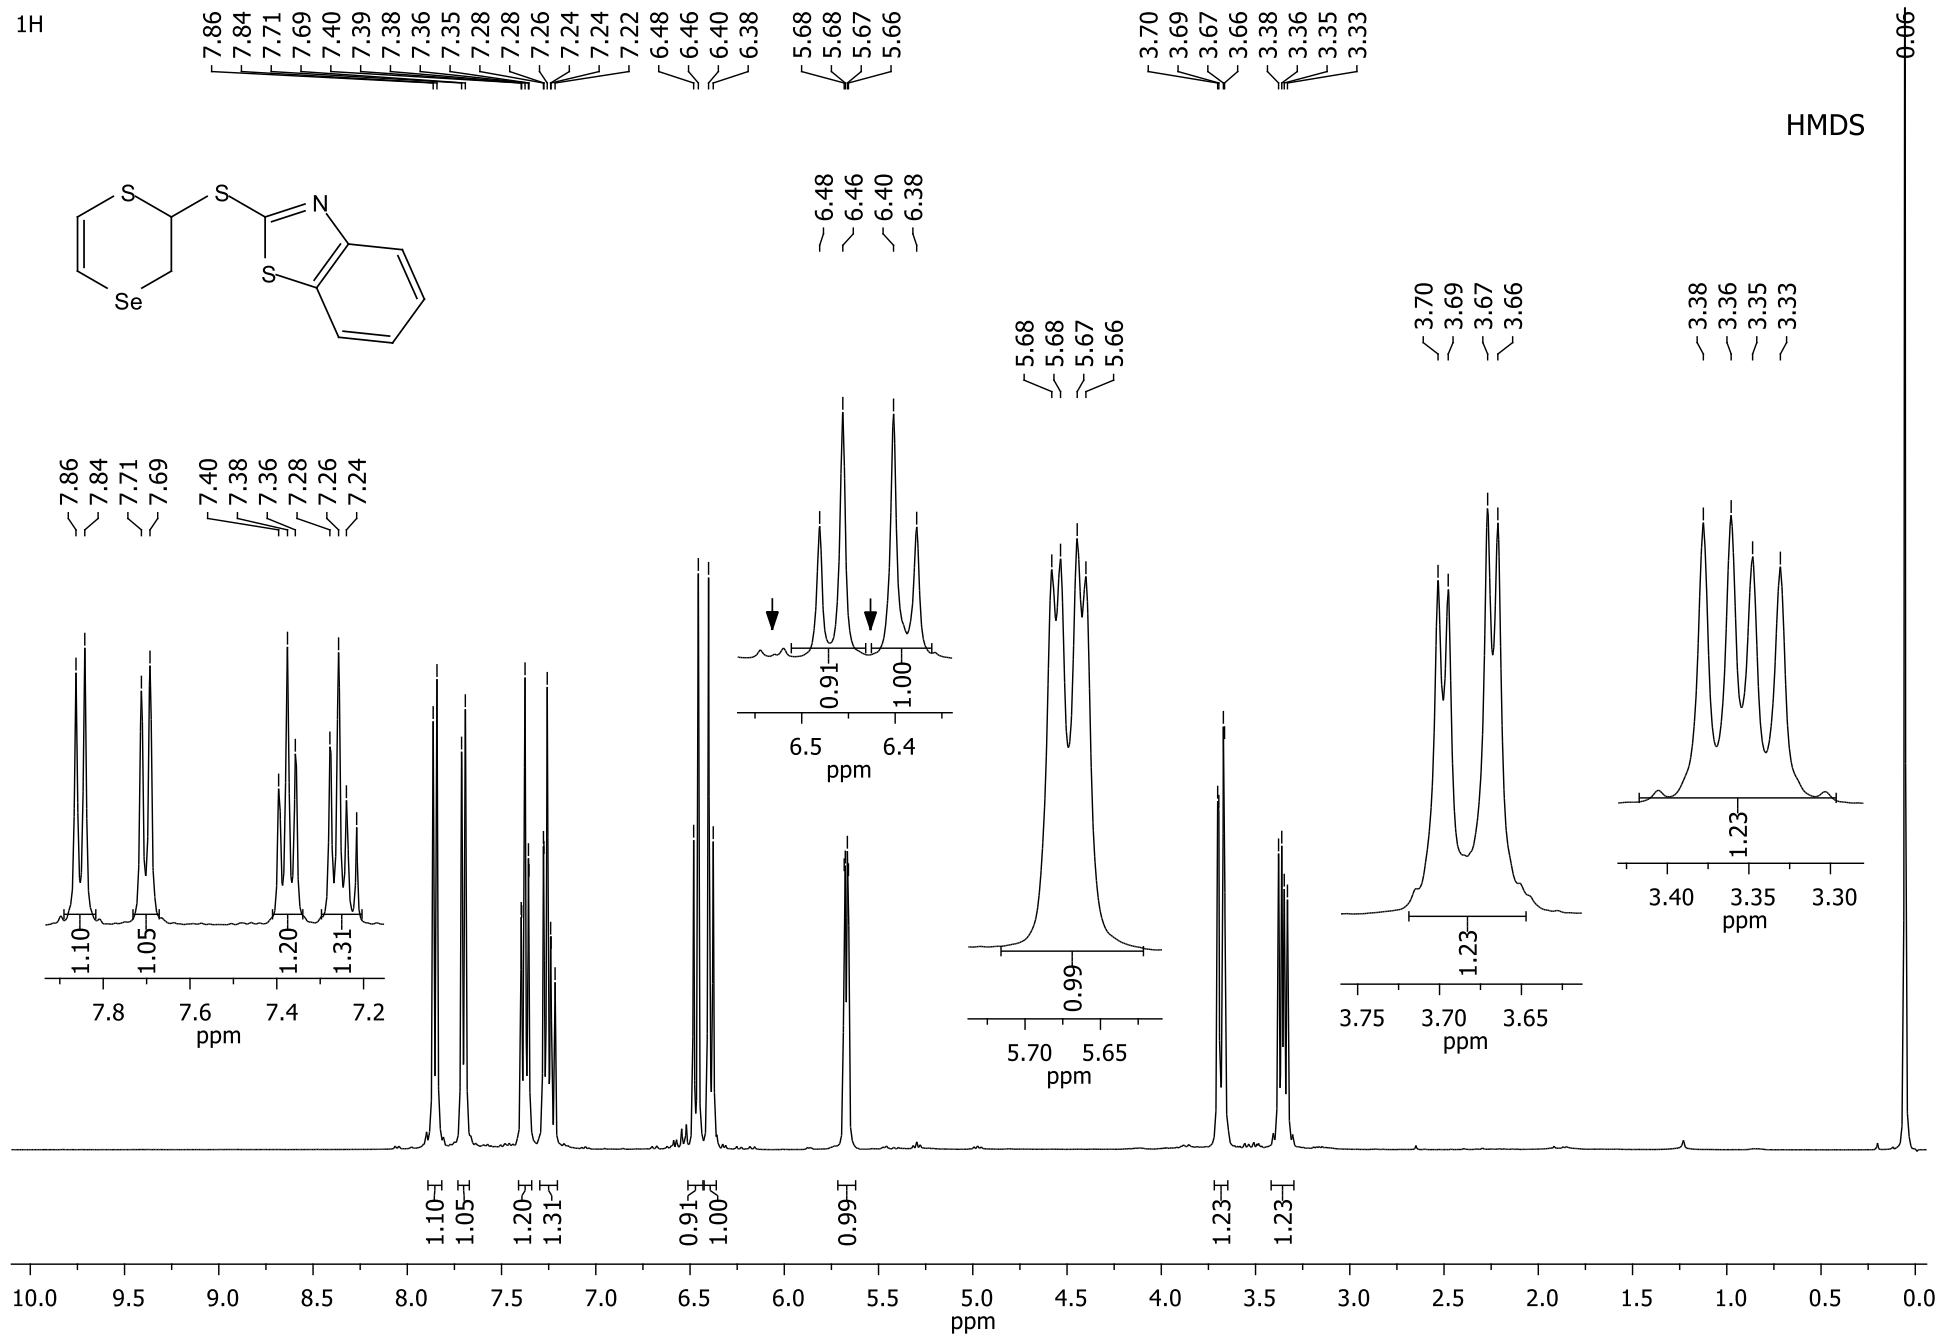

**<sup>1</sup>H NMR spectrum of 2-(2,3-dihydro-1,4-thiaselenin-2-ylsulfanyl)-1,3-benzothiazole (3d)**

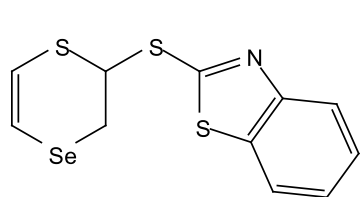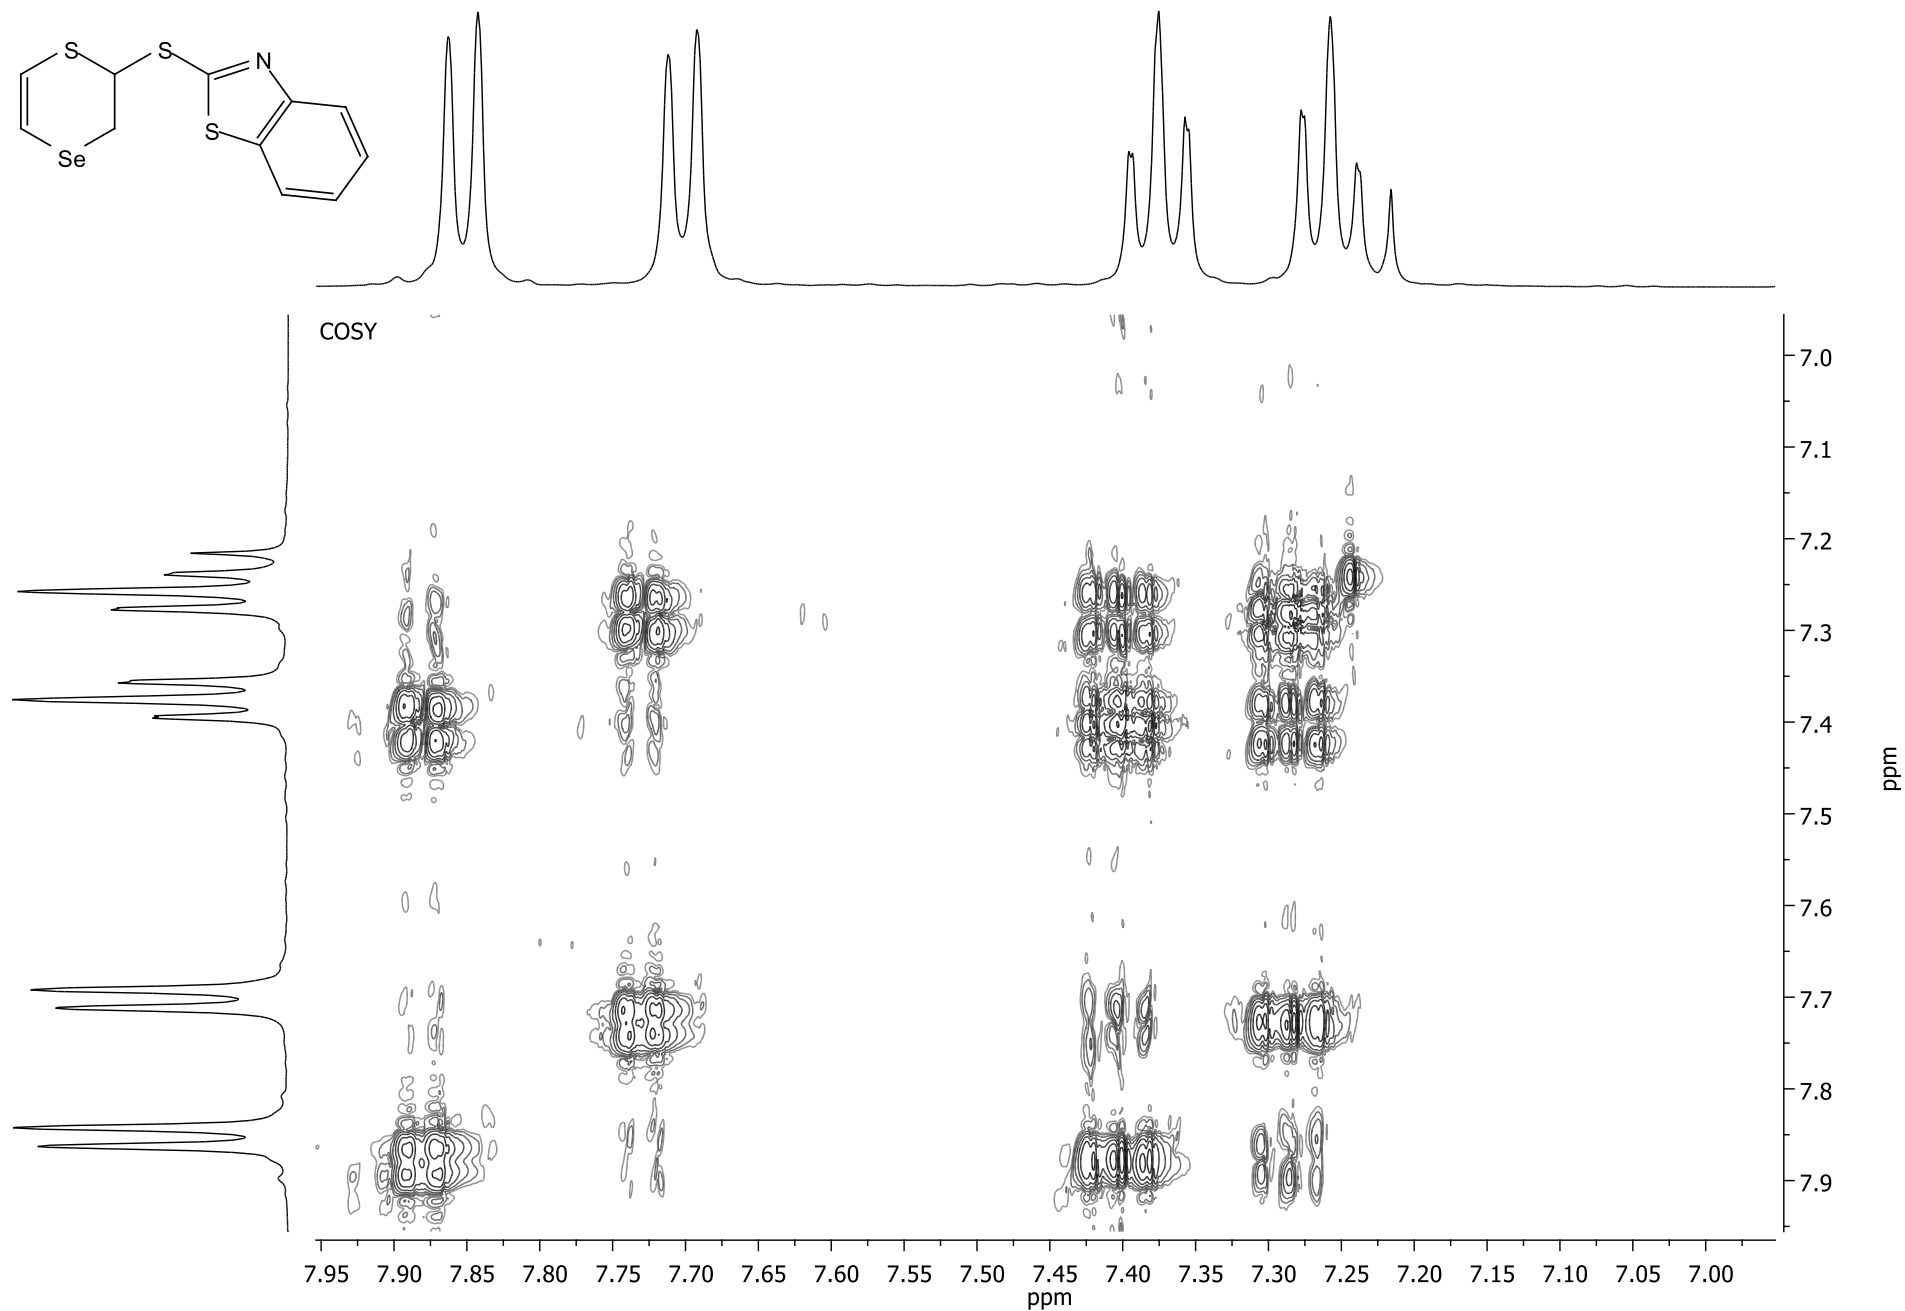

**COSY NMR spectrum of 2-(2,3-dihydro-1,4-thiaselenin-2-ylsulfanyl)-1,3-benzothiazole (3d)**

<sup>13</sup>C

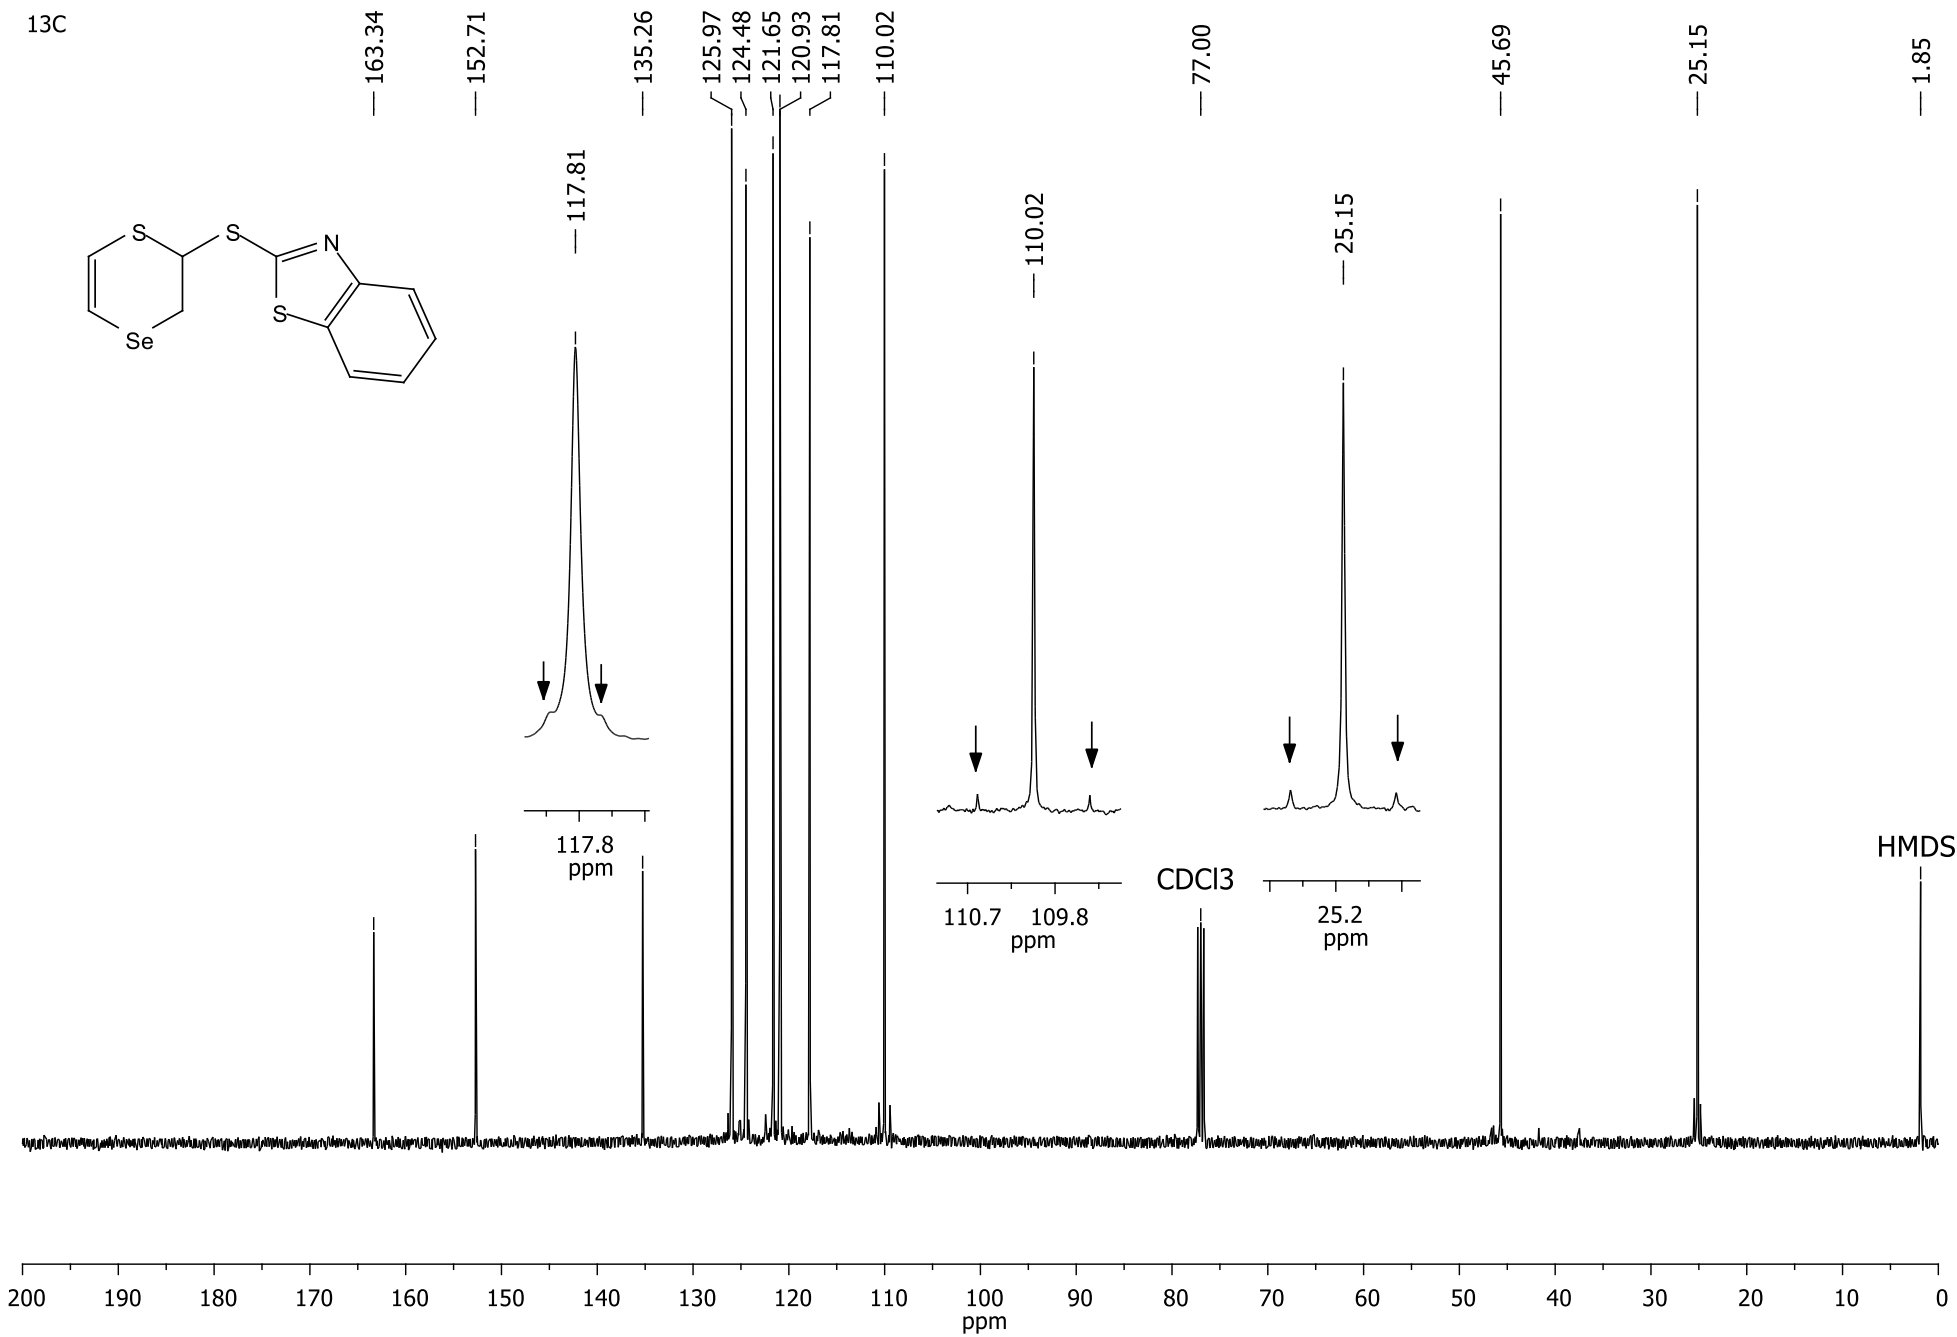

<sup>13</sup>C NMR spectrum of 2-(2,3-dihydro-1,4-thiaselenin-2-ylsulfanyl)-1,3-benzothiazole (3d)

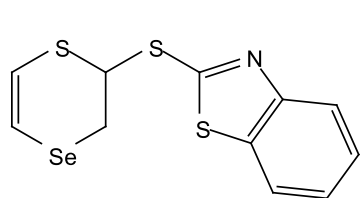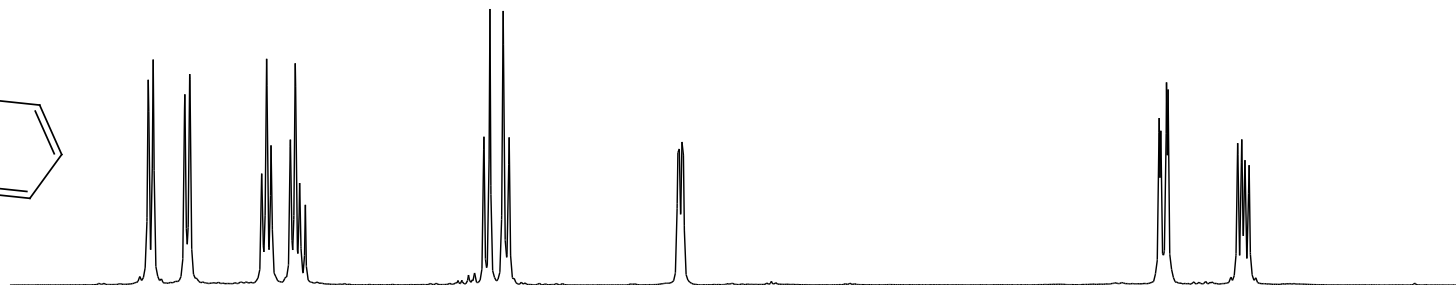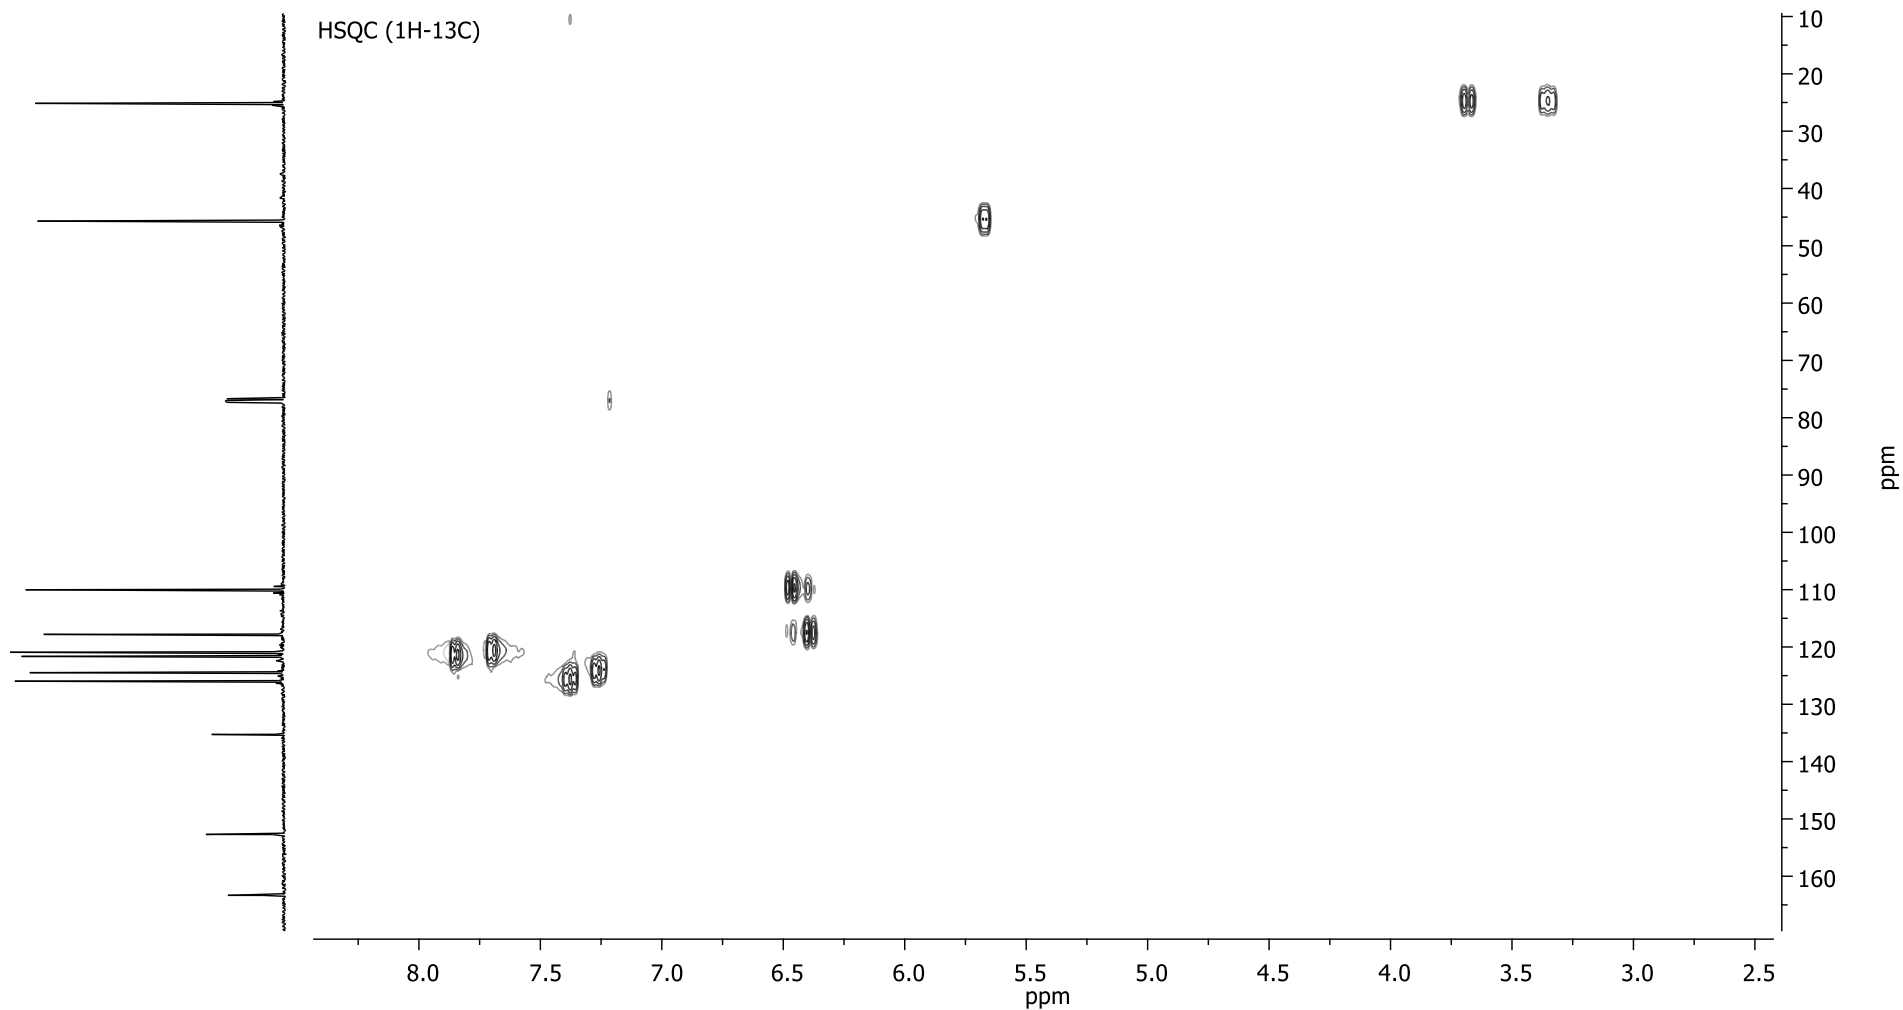

HSQC (<sup>1</sup>H-<sup>13</sup>C) NMR spectrum of 2-(2,3-dihydro-1,4-thiaselenin-2-ylsulfanyl)-1,3-benzothiazole (3d)

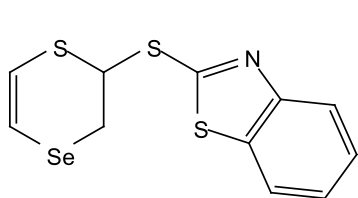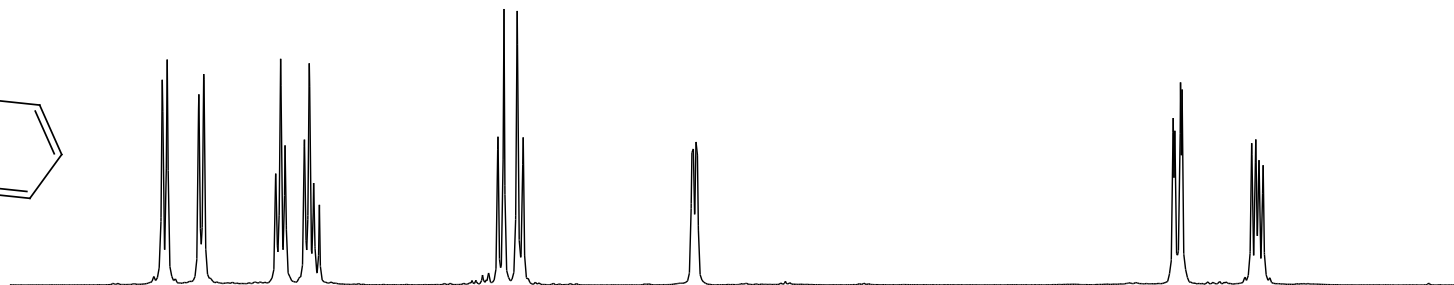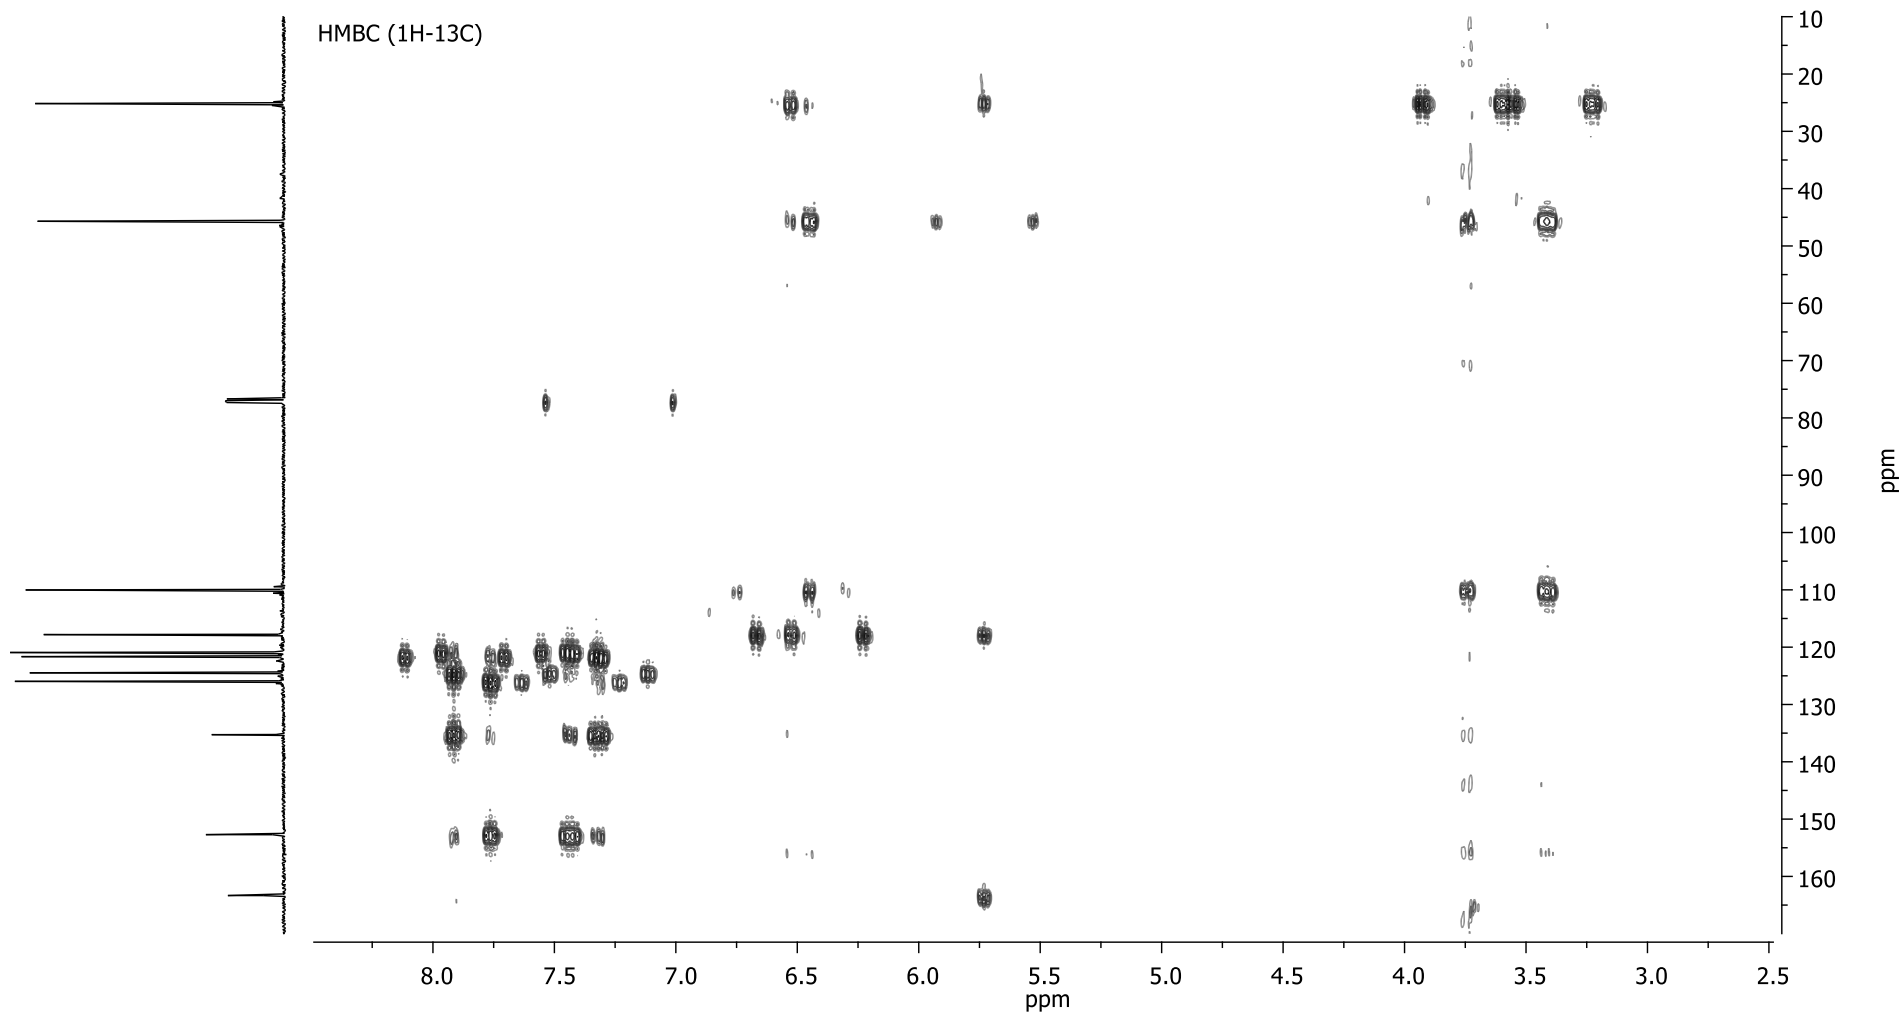

HMBC (<sup>1</sup>H-<sup>13</sup>C) NMR spectrum of 2-(2,3-dihydro-1,4-thiaselenin-2-ylsulfanyl)-1,3-benzothiazole (3d)



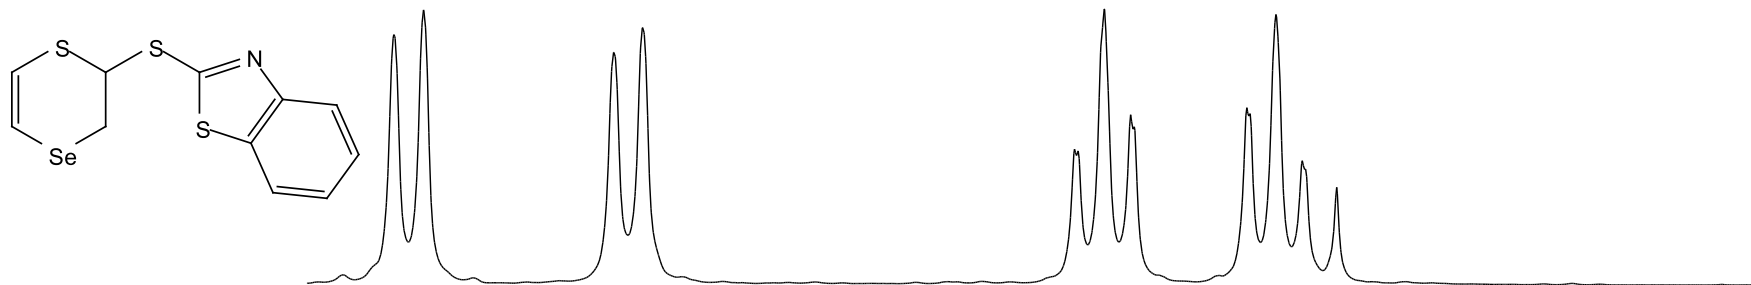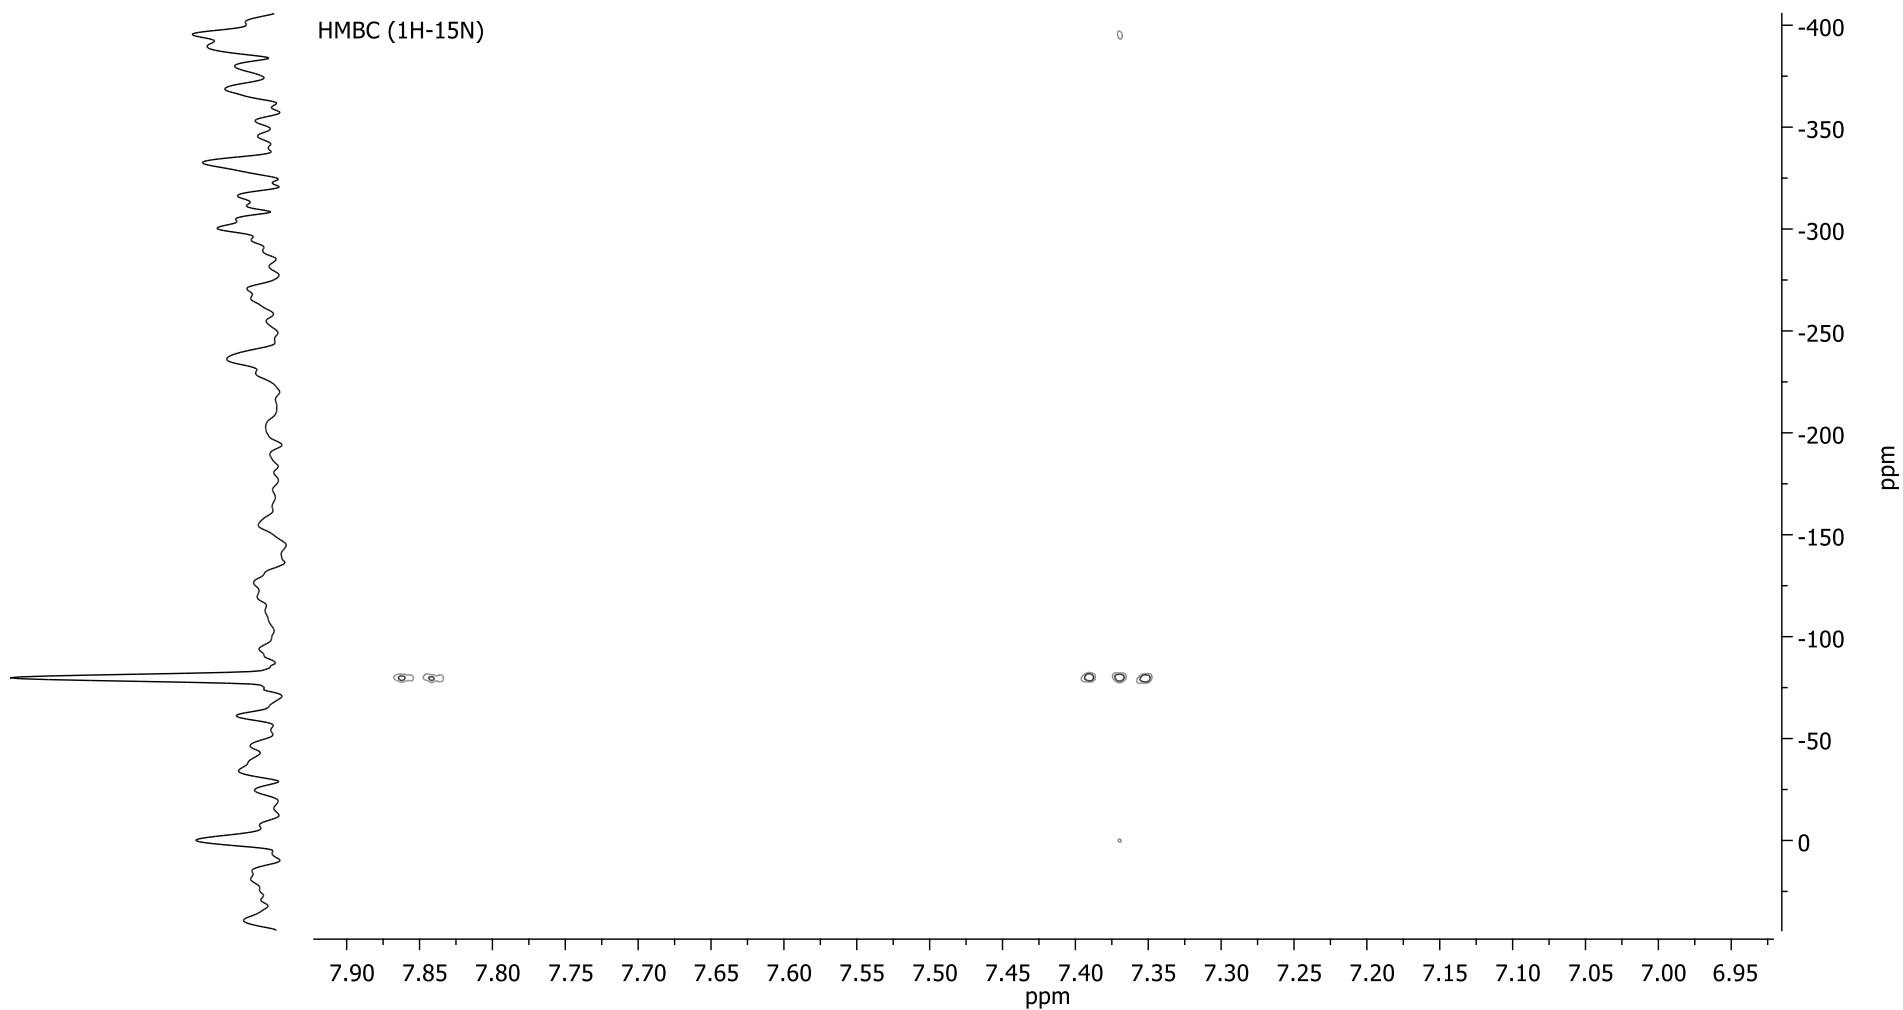

**HMBC (<sup>1</sup>H-<sup>15</sup>N) NMR spectrum of 2-(2,3-dihydro-1,4-thiaselenin-2-ylsulfanyl)-1,3-benzothiazole (3d)**

<sup>77</sup>Se

— 181.05

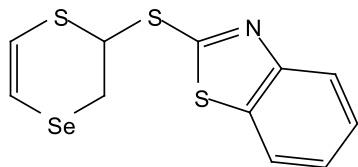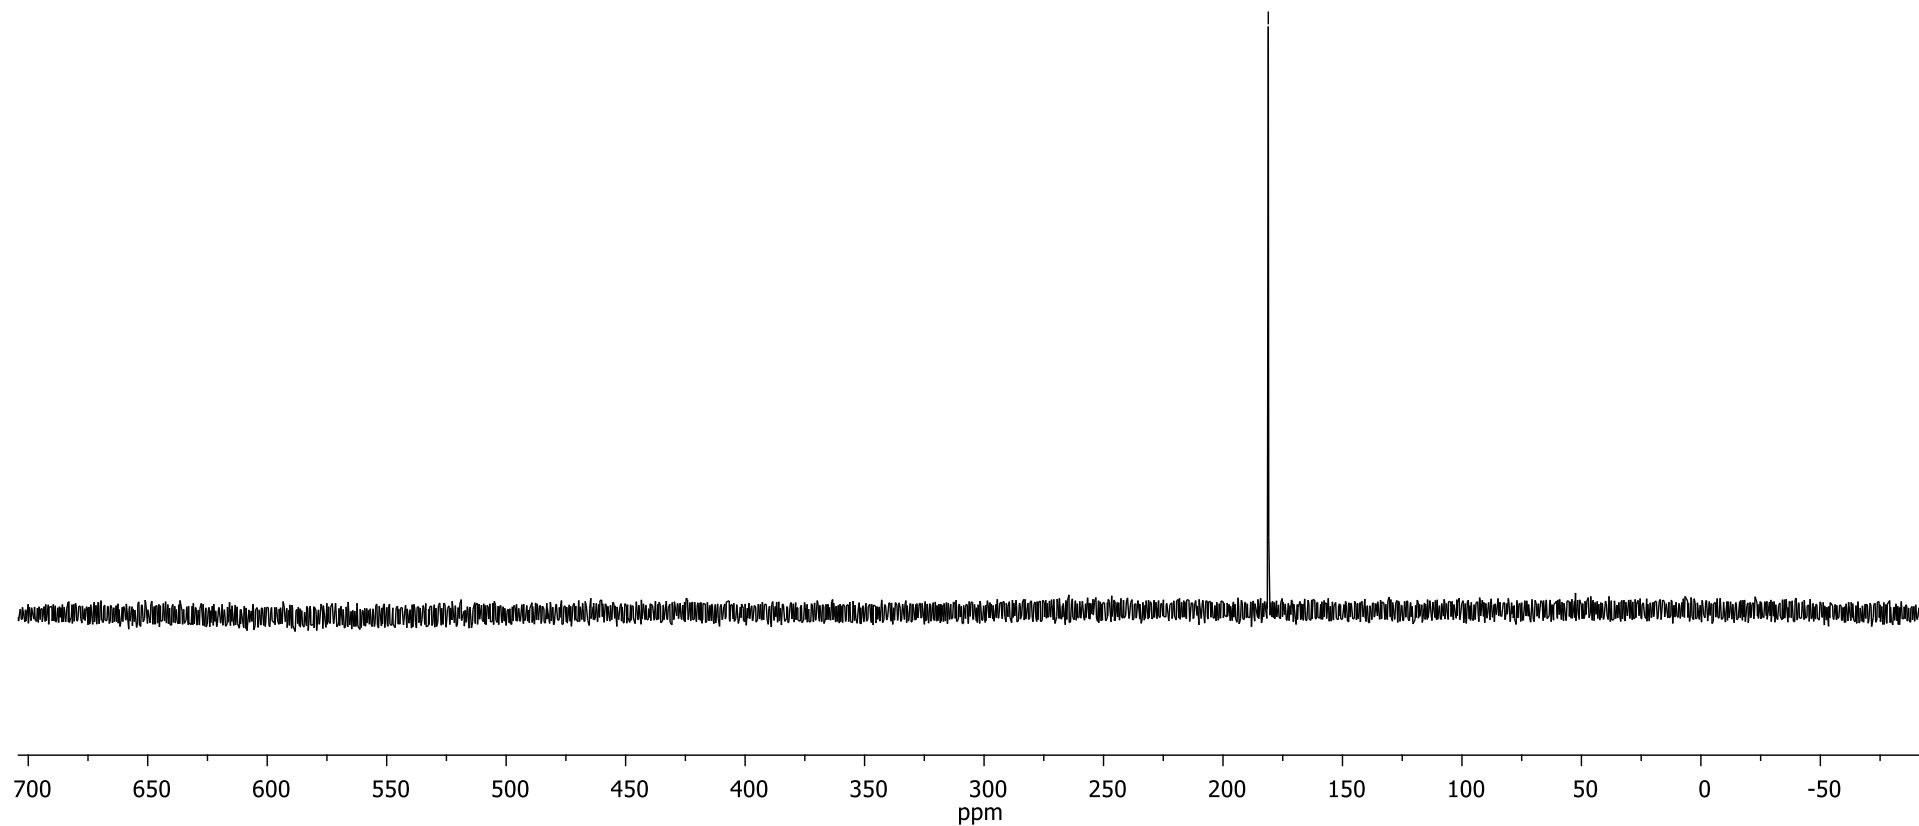

<sup>77</sup>Se NMR spectrum of 2-(2,3-dihydro-1,4-thiaselenin-2-ylsulfanyl)-1,3-benzothiazole (3d)

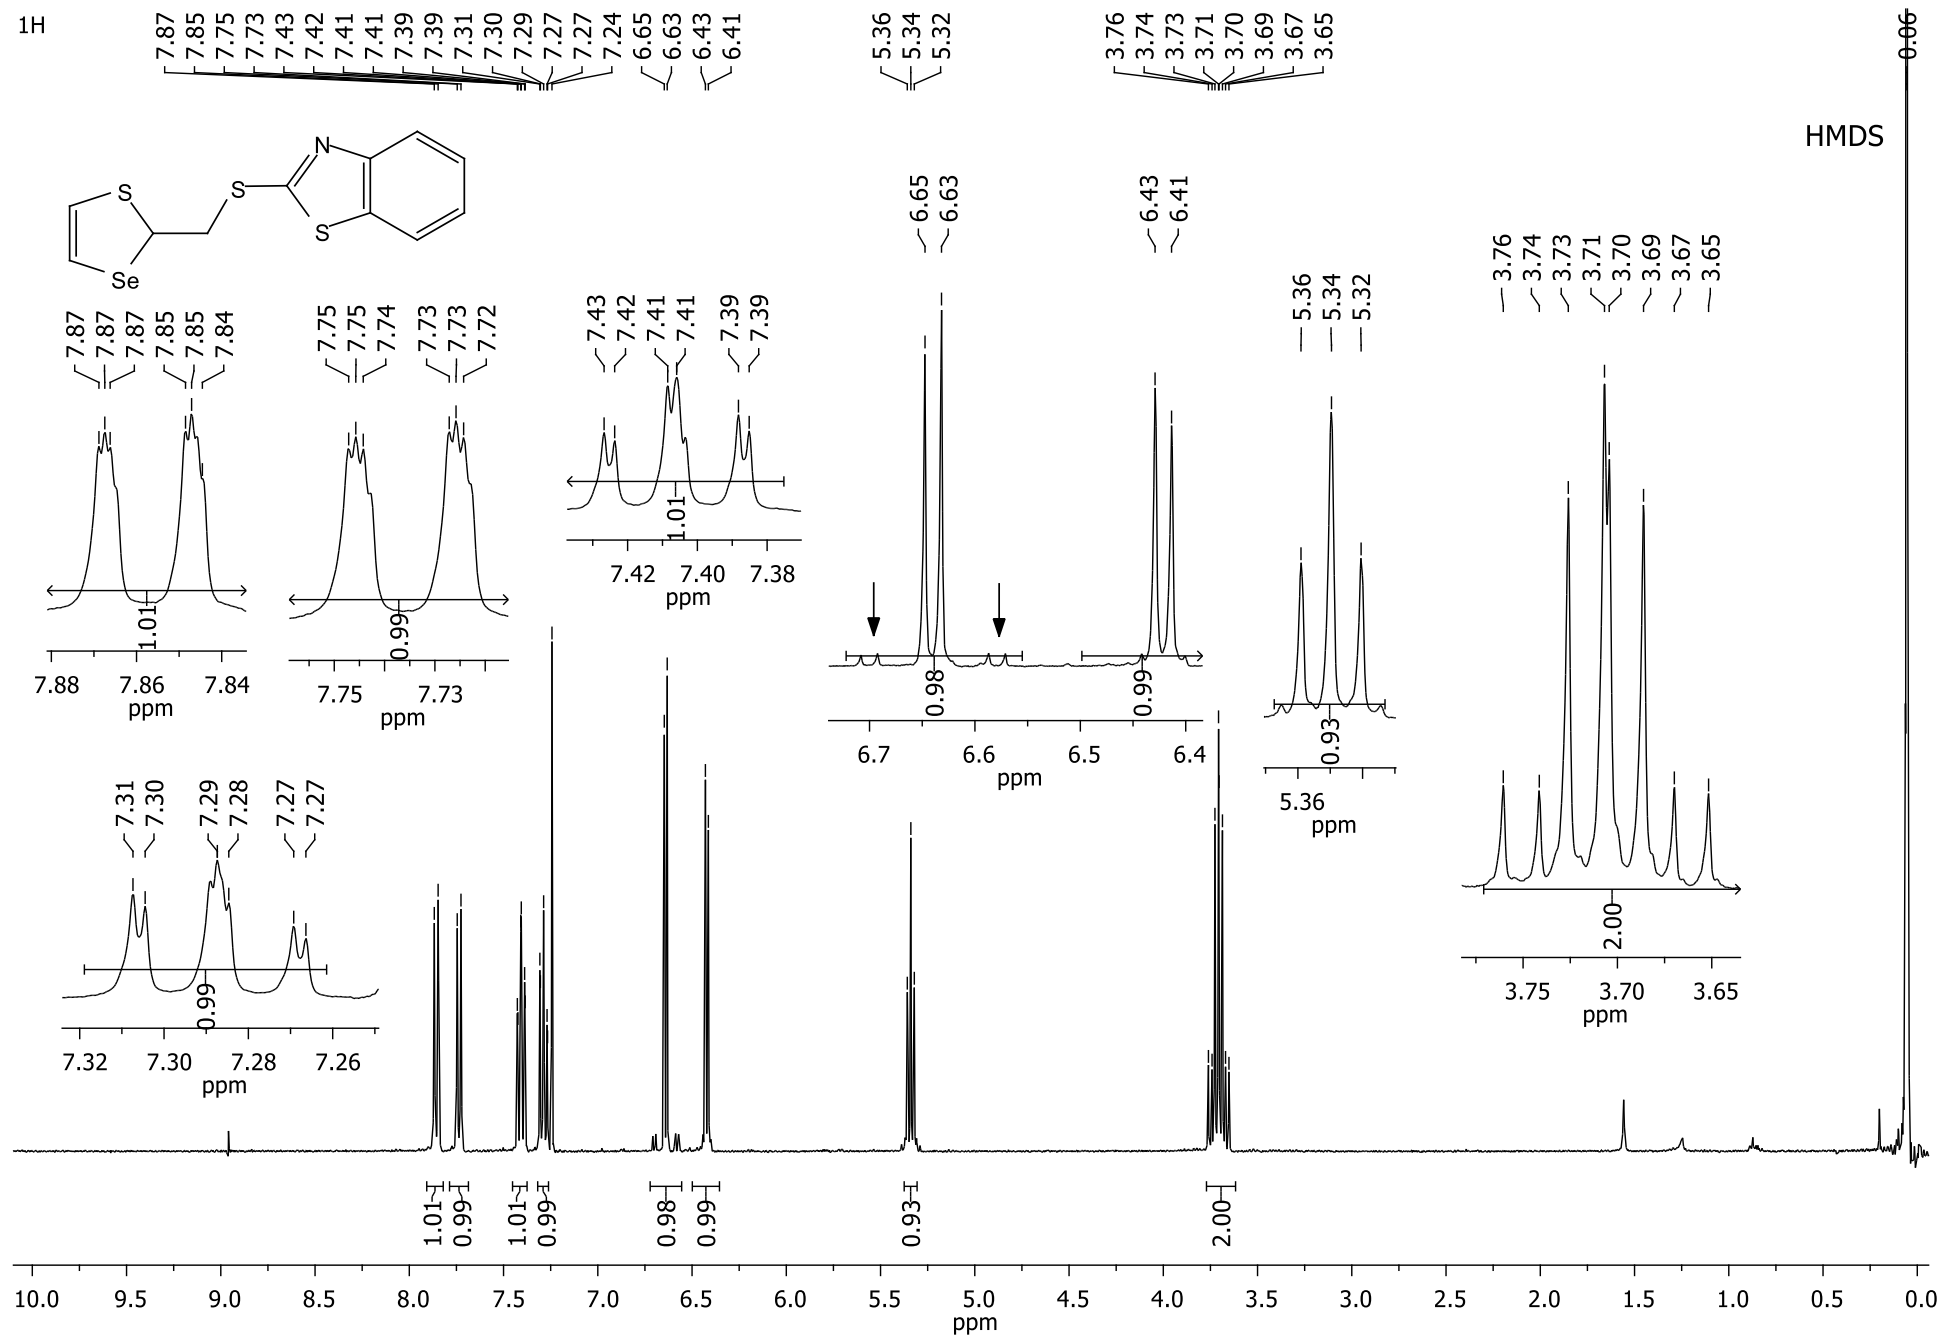

**<sup>1</sup>H NMR spectrum of 2-[(1,3-thiaselenol-2-ylmethyl)sulfanyl]-1,3-benzothiazole (4d)**

<sup>13</sup>C

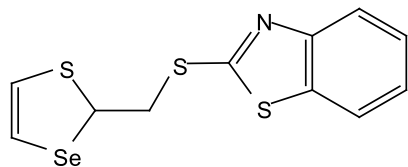

— 165.15

— 153.04

— 135.40

— 126.08

— 124.42

— 121.62

— 121.01

— 119.85

— 113.74

77.00

CDCI<sub>3</sub>

— 46.75

— 41.94

HMDS

— 1.92

— 113.74

— 46.75

— 41.94

114.3 113.4  
ppm

46.9 46.2  
ppm

ppm

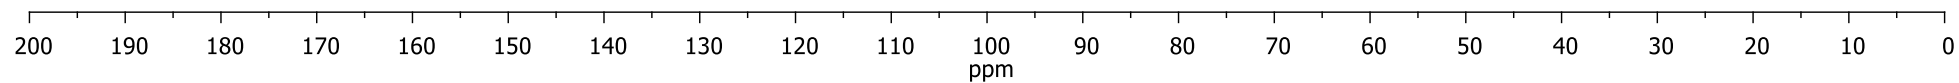

<sup>13</sup>C NMR spectrum of 2-[(1,3-thiaselenol-2-ylmethyl)sulfanyl]-1,3-benzothiazole (4d)

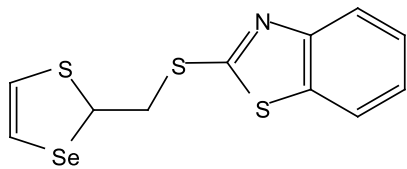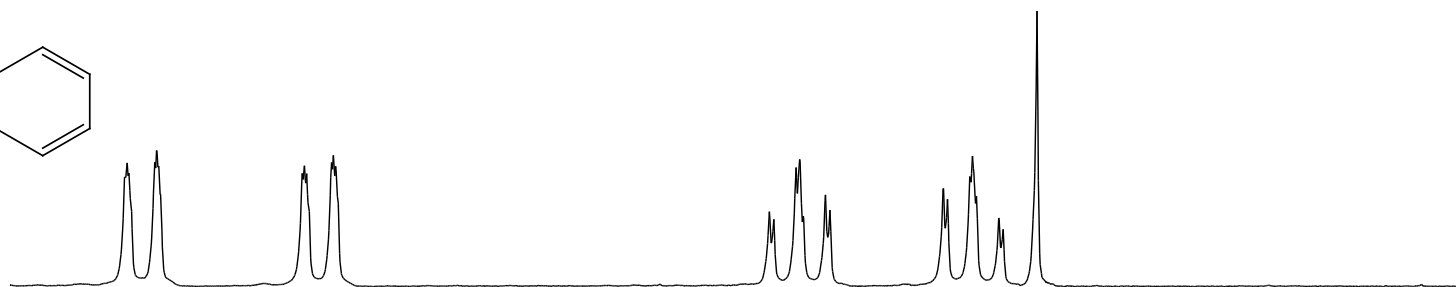

HMBC (1H-15N)

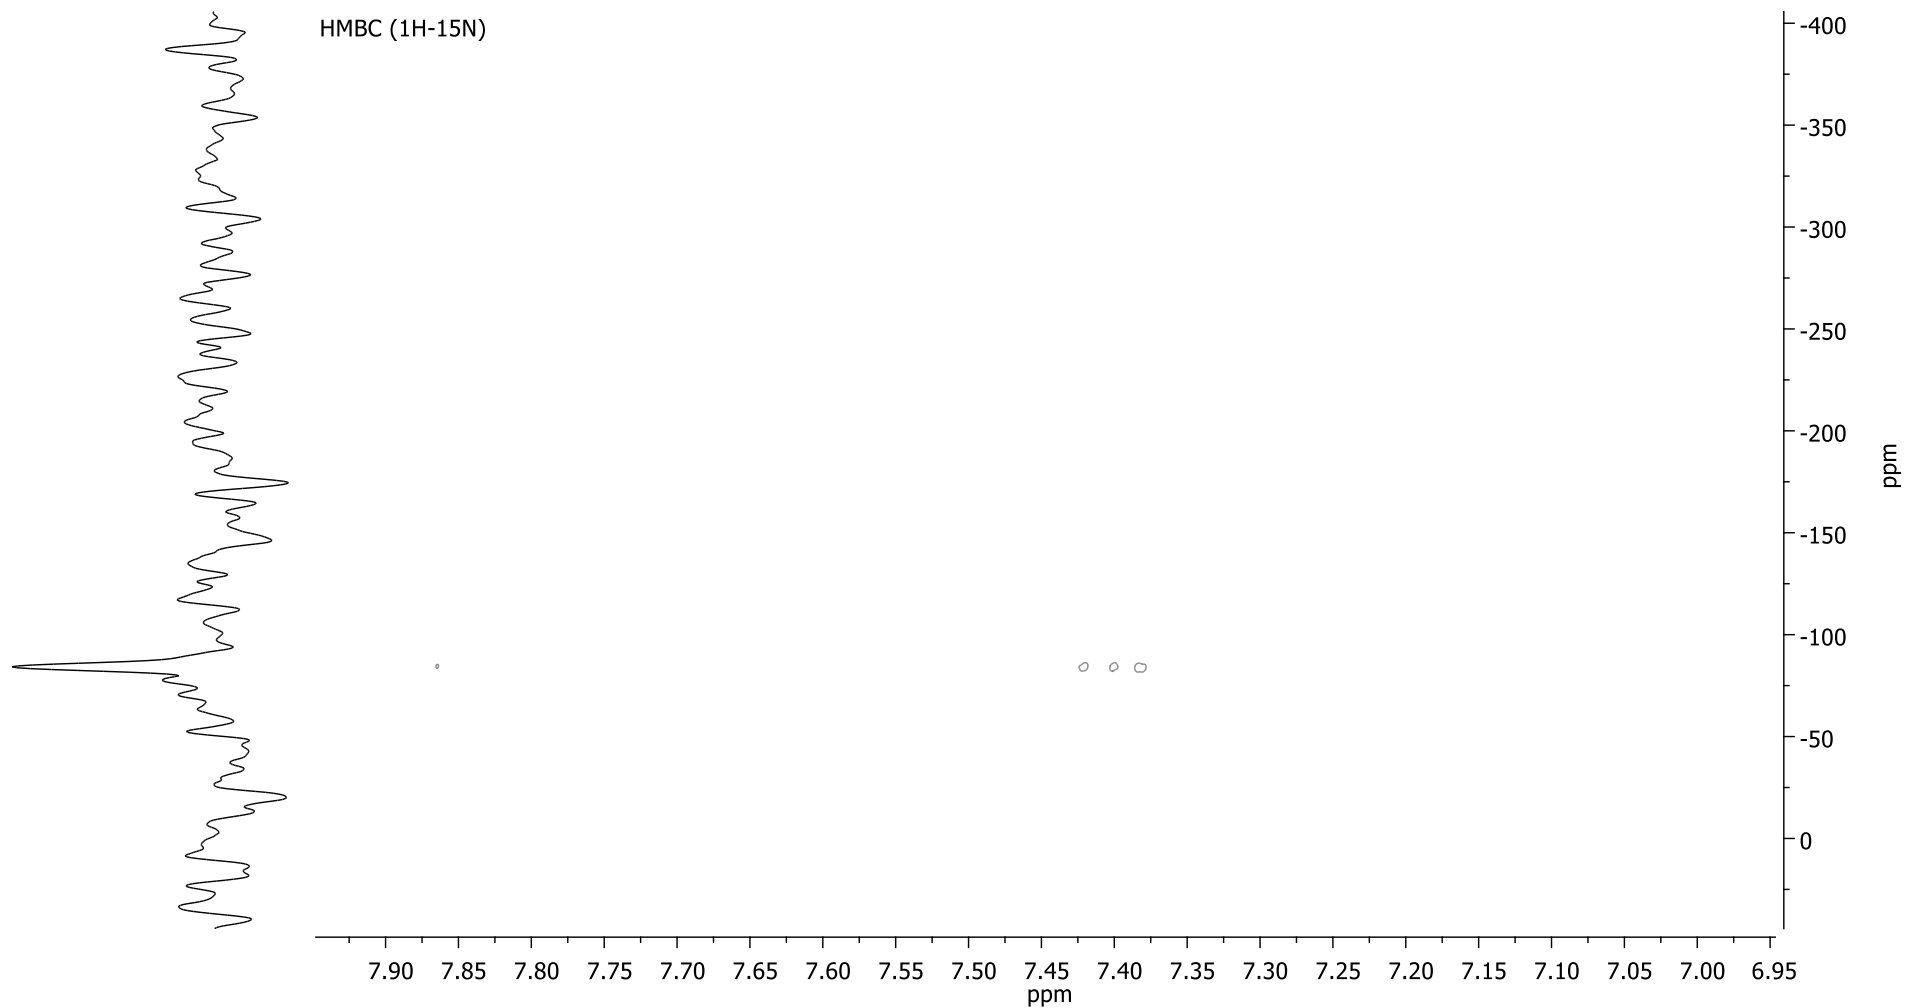

**HMBC ( $^1\text{H}$ - $^{15}\text{N}$ ) NMR spectrum of 2-[(1,3-thiaselenol-2-ylmethyl)sulfanyl]-1,3-benzothiazole (4d)**

$^{77}\text{Se}$

— 517.55

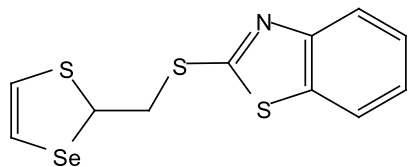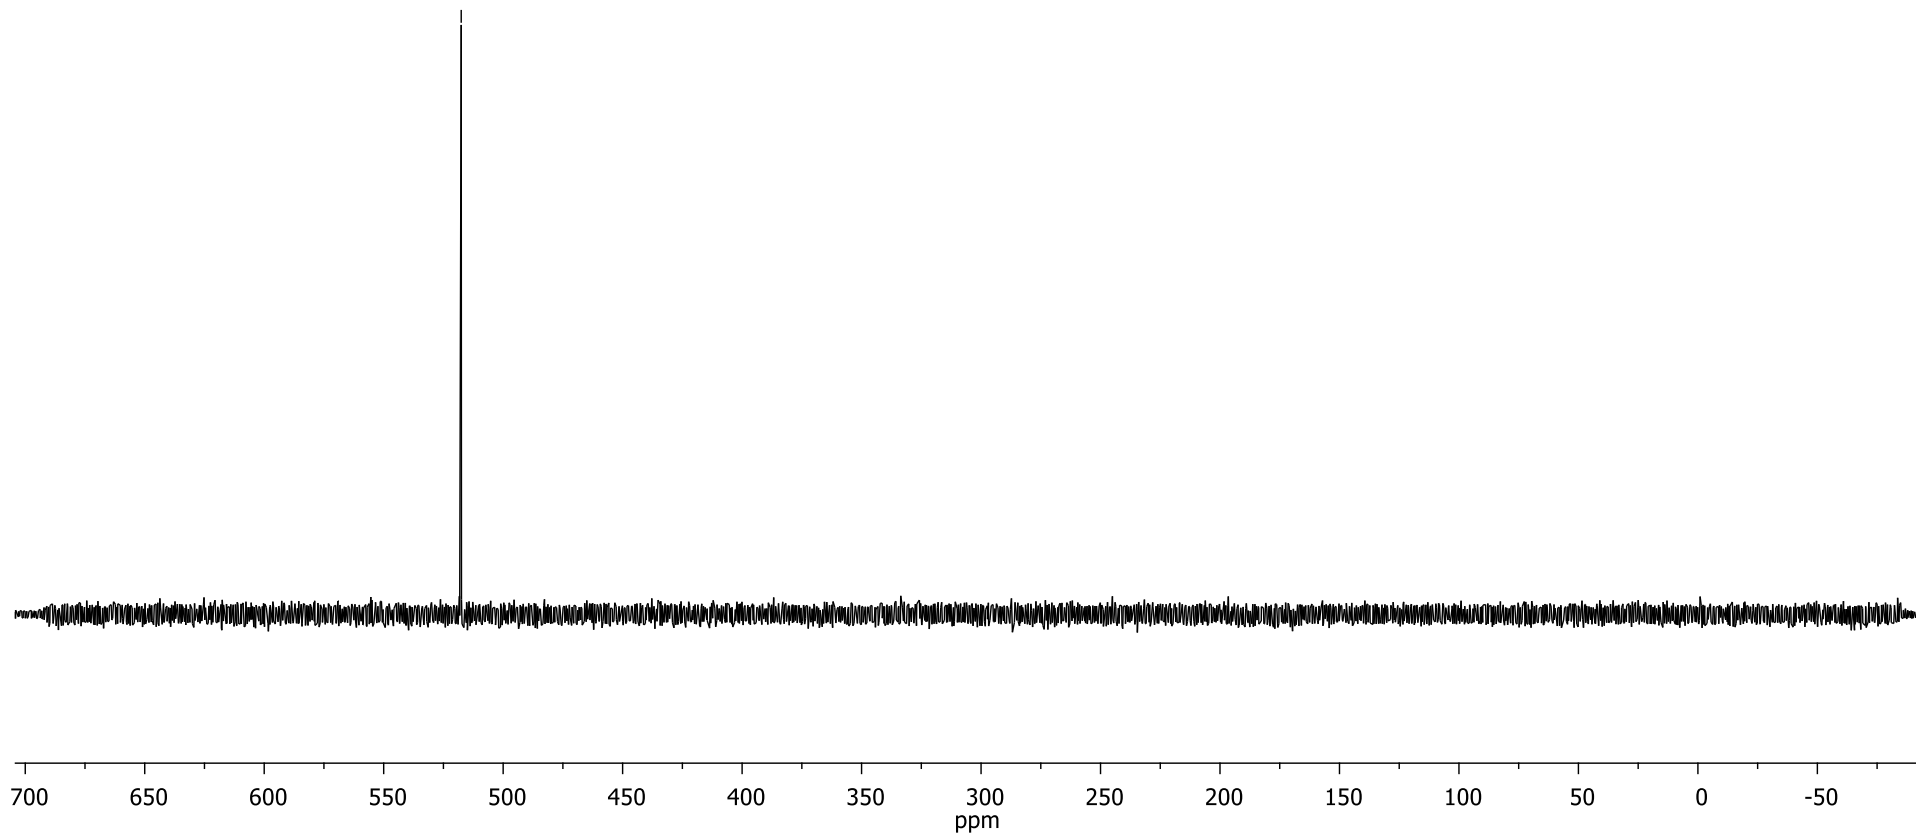

$^{77}\text{Se}$  NMR spectrum of 2-[(1,3-thiaselenol-2-ylmethyl)sulfanyl]-1,3-benzothiazole (4d)

<sup>1</sup>H

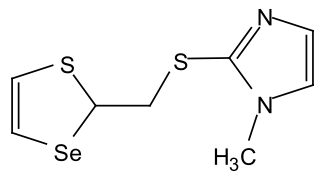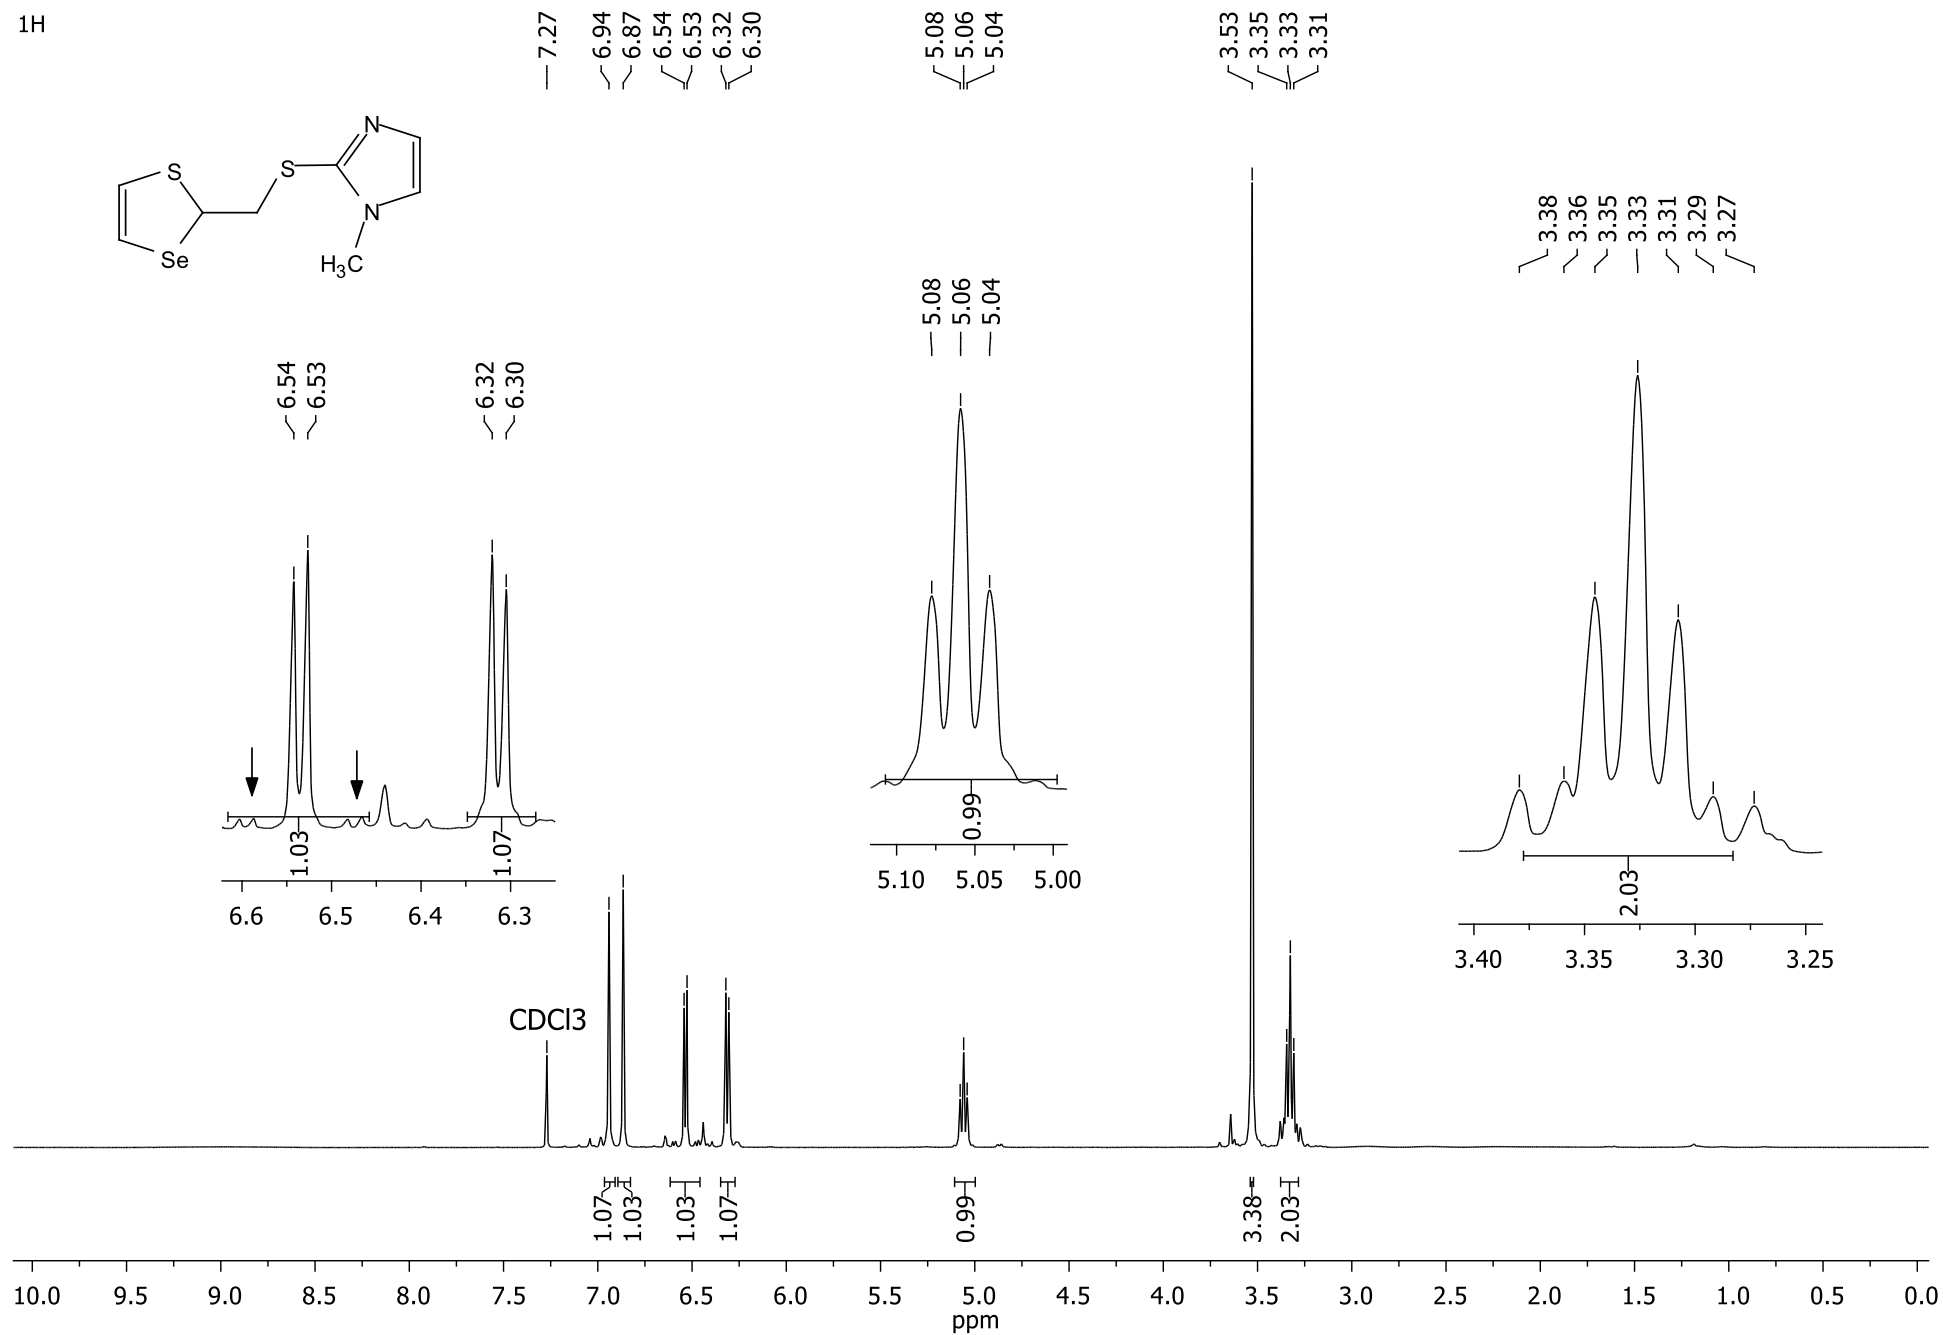

**<sup>1</sup>H NMR spectrum of 1-methyl-2-[(1,3-thiaselenol-2-yl)methyl]sulfanyl-1H-imidazole (4e)**

13C

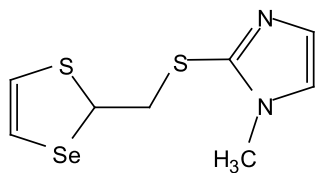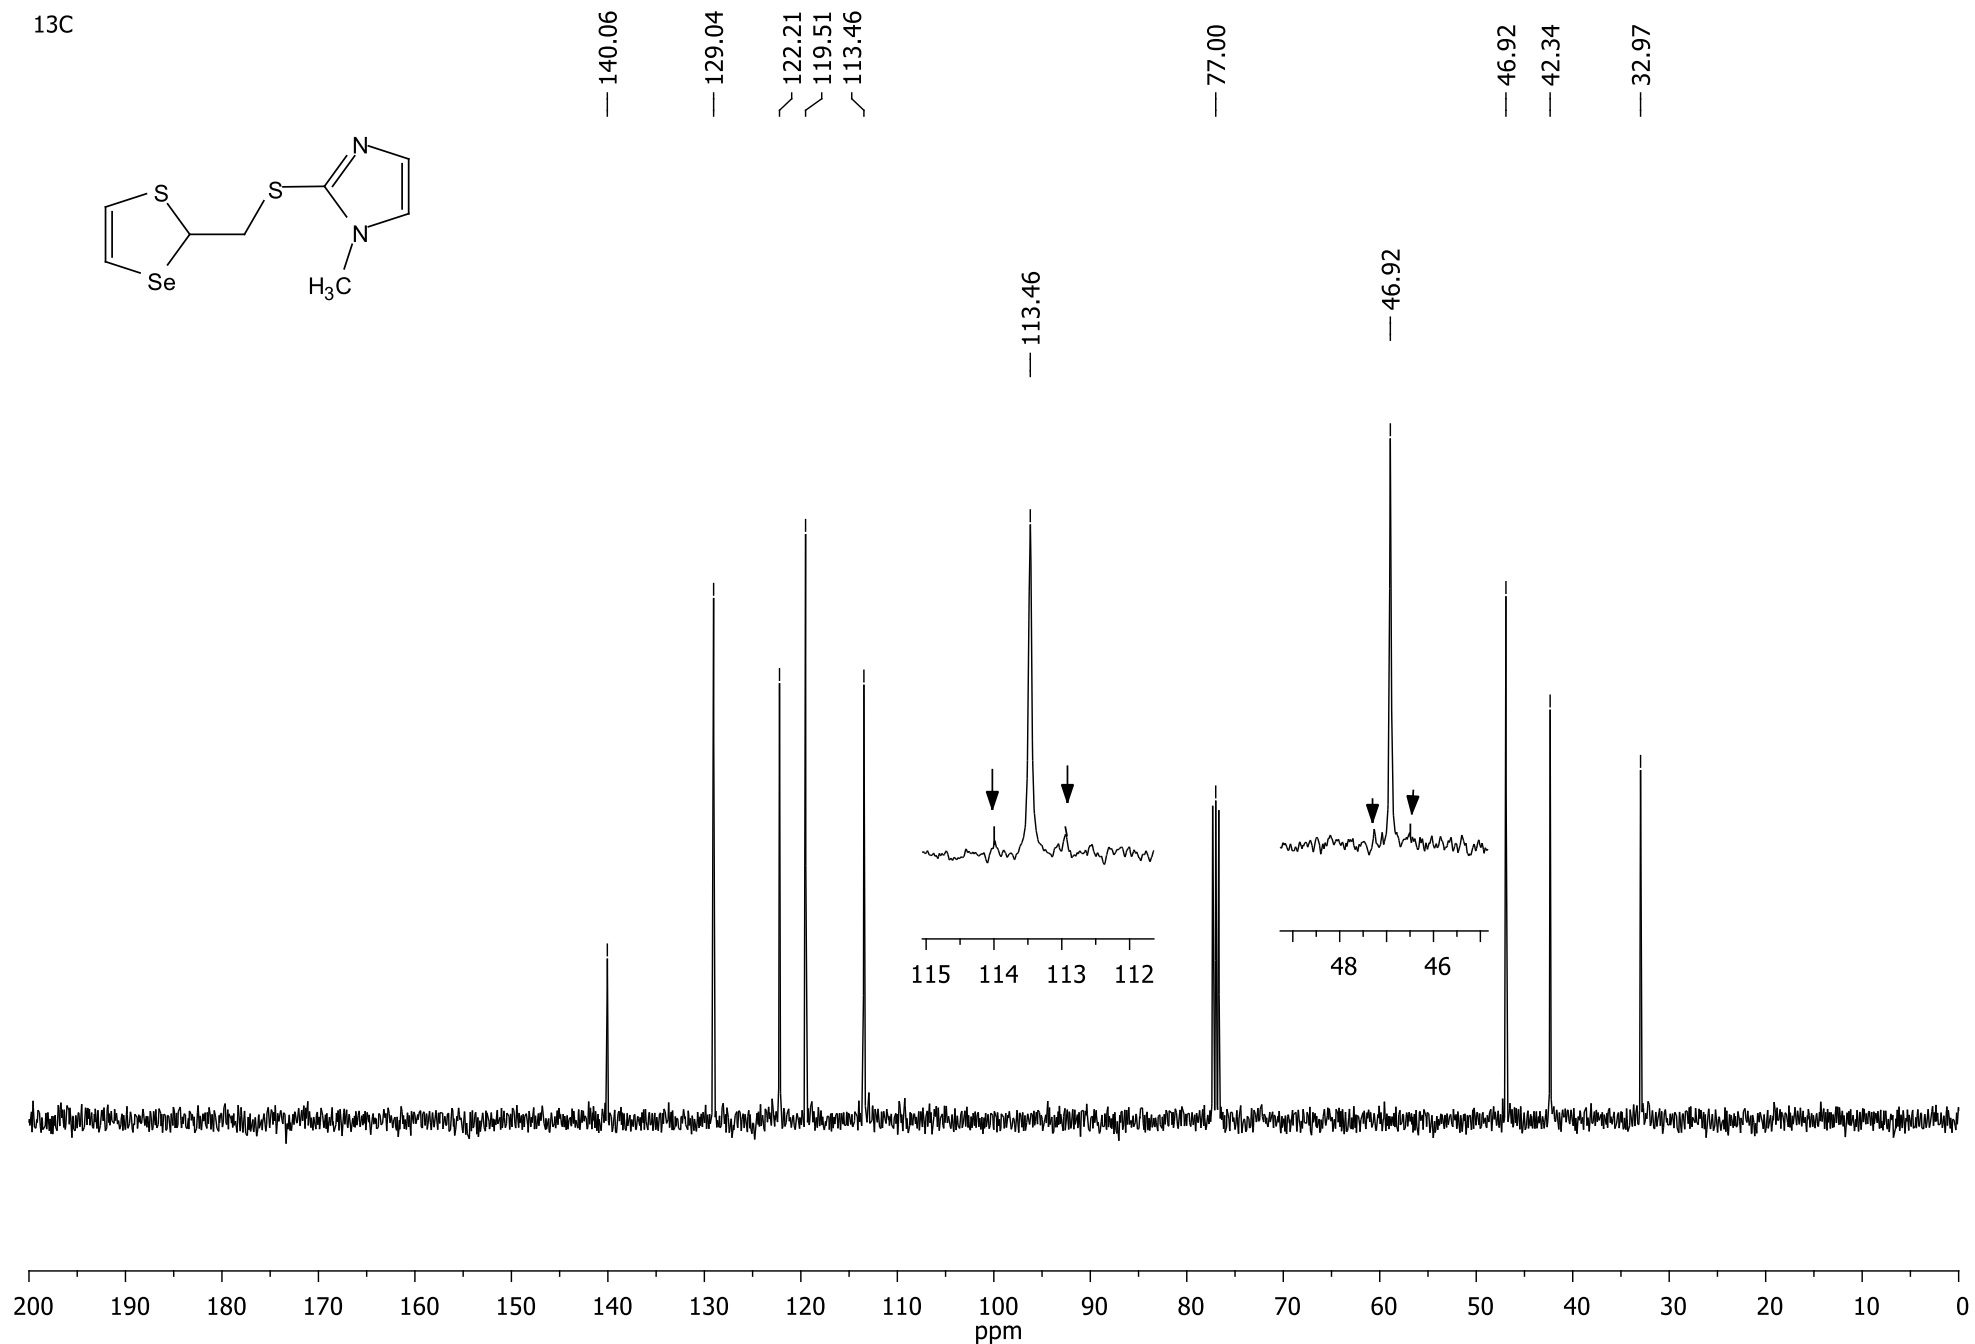

**<sup>13</sup>C NMR spectrum of 1-methyl-2-[(1,3-thiaselenol-2-ylmethyl)sulfanyl]-1H-imidazole (4e)**



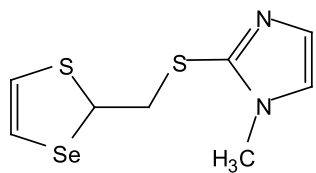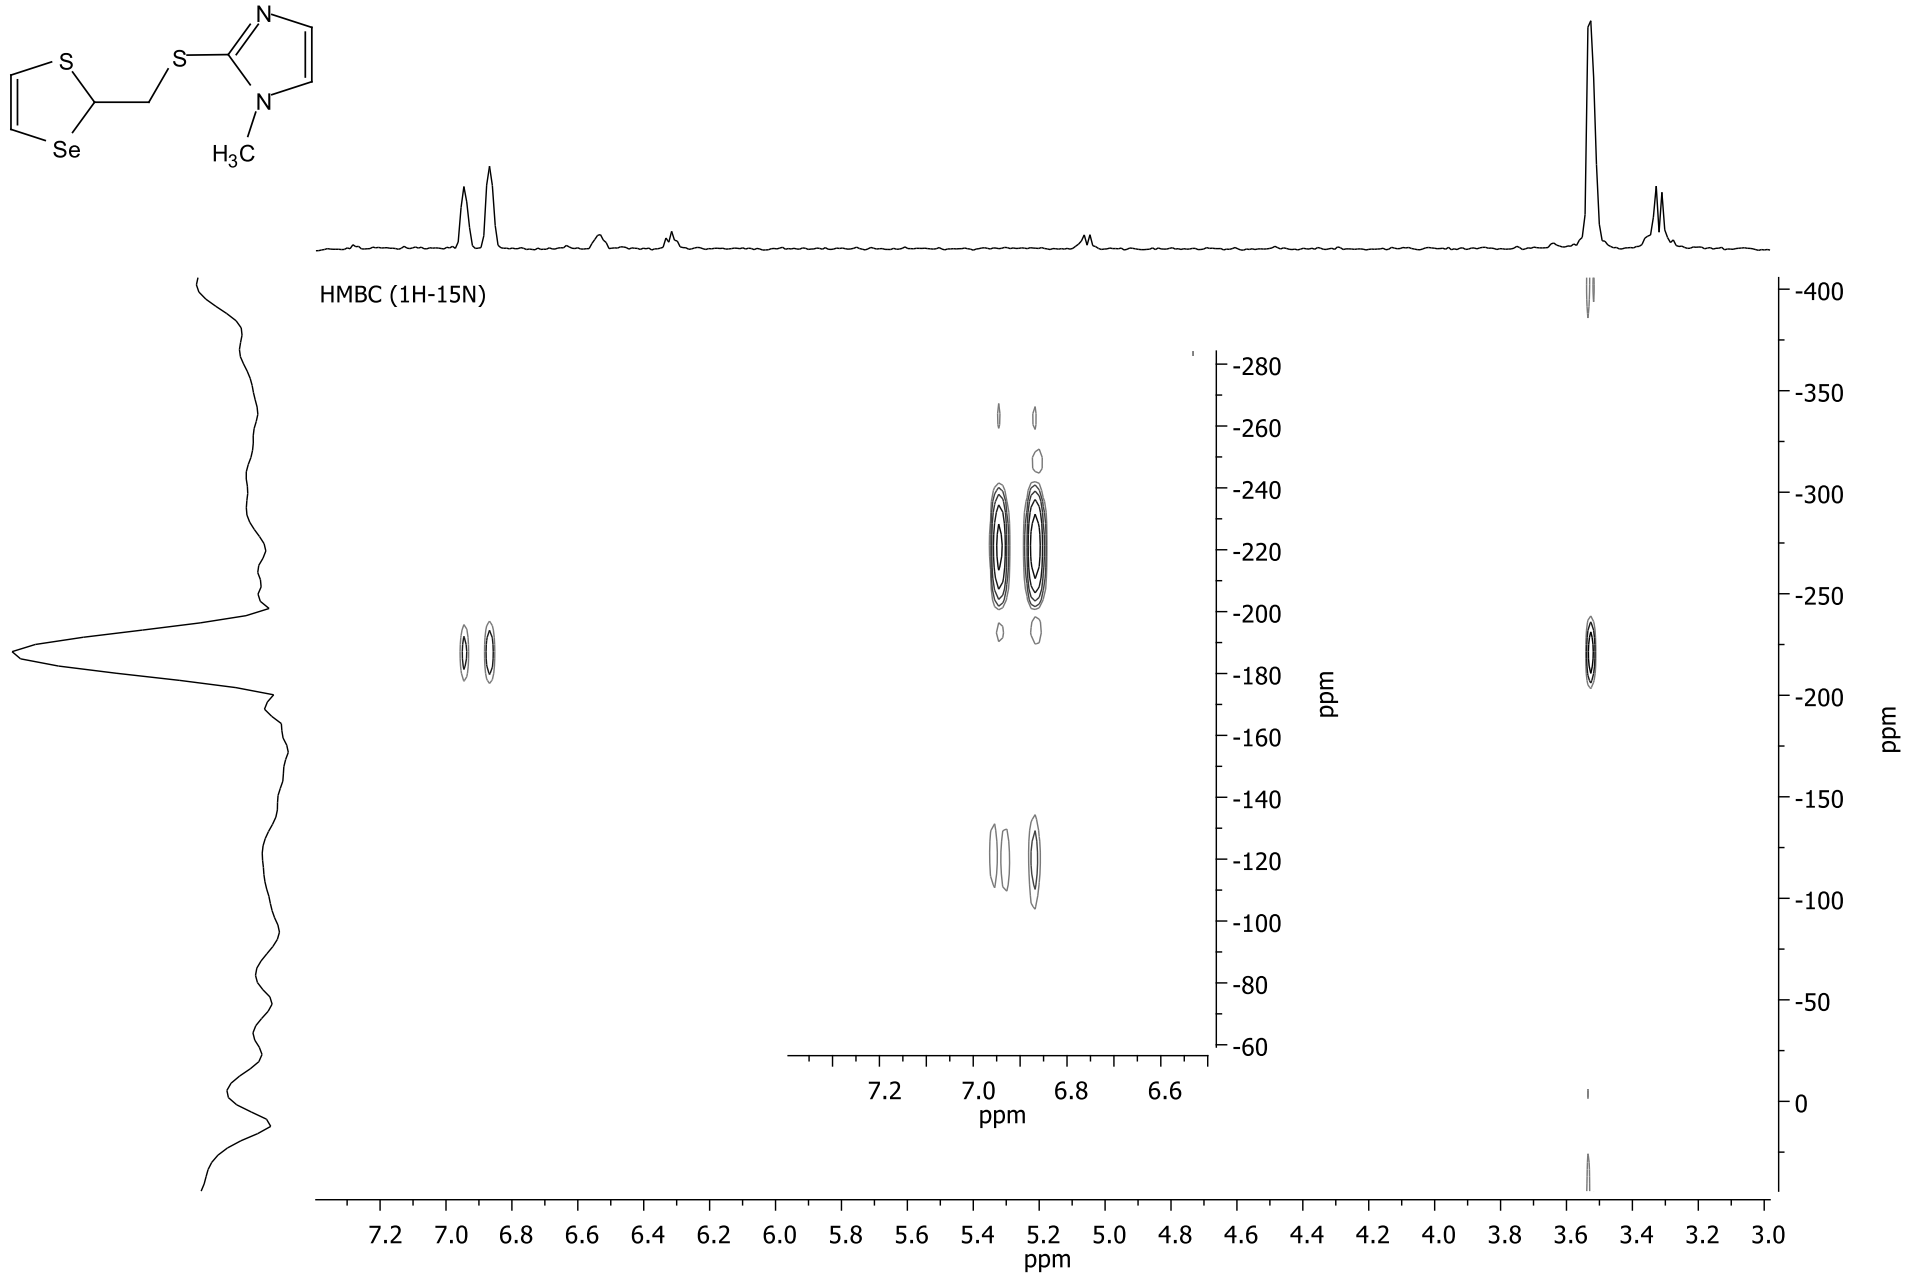

**HMBC ( $^1\text{H}$ - $^{15}\text{N}$ ) NMR spectrum of 1-methyl-2-[(1,3-thiaselenol-2-ylmethyl)sulfanyl]-1H-imidazole (4e)**

<sup>77</sup>Se

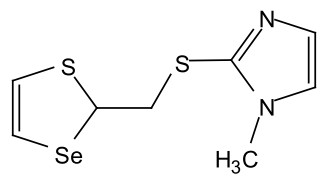

— 513.80

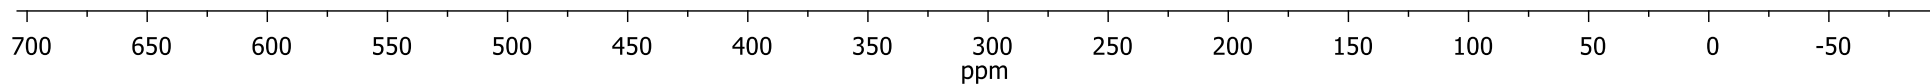

**<sup>77</sup>Se NMR spectrum of 1-methyl-2-[(1,3-thiaselenol-2-ylmethyl)sulfanyl]-1H-imidazole (4e)**

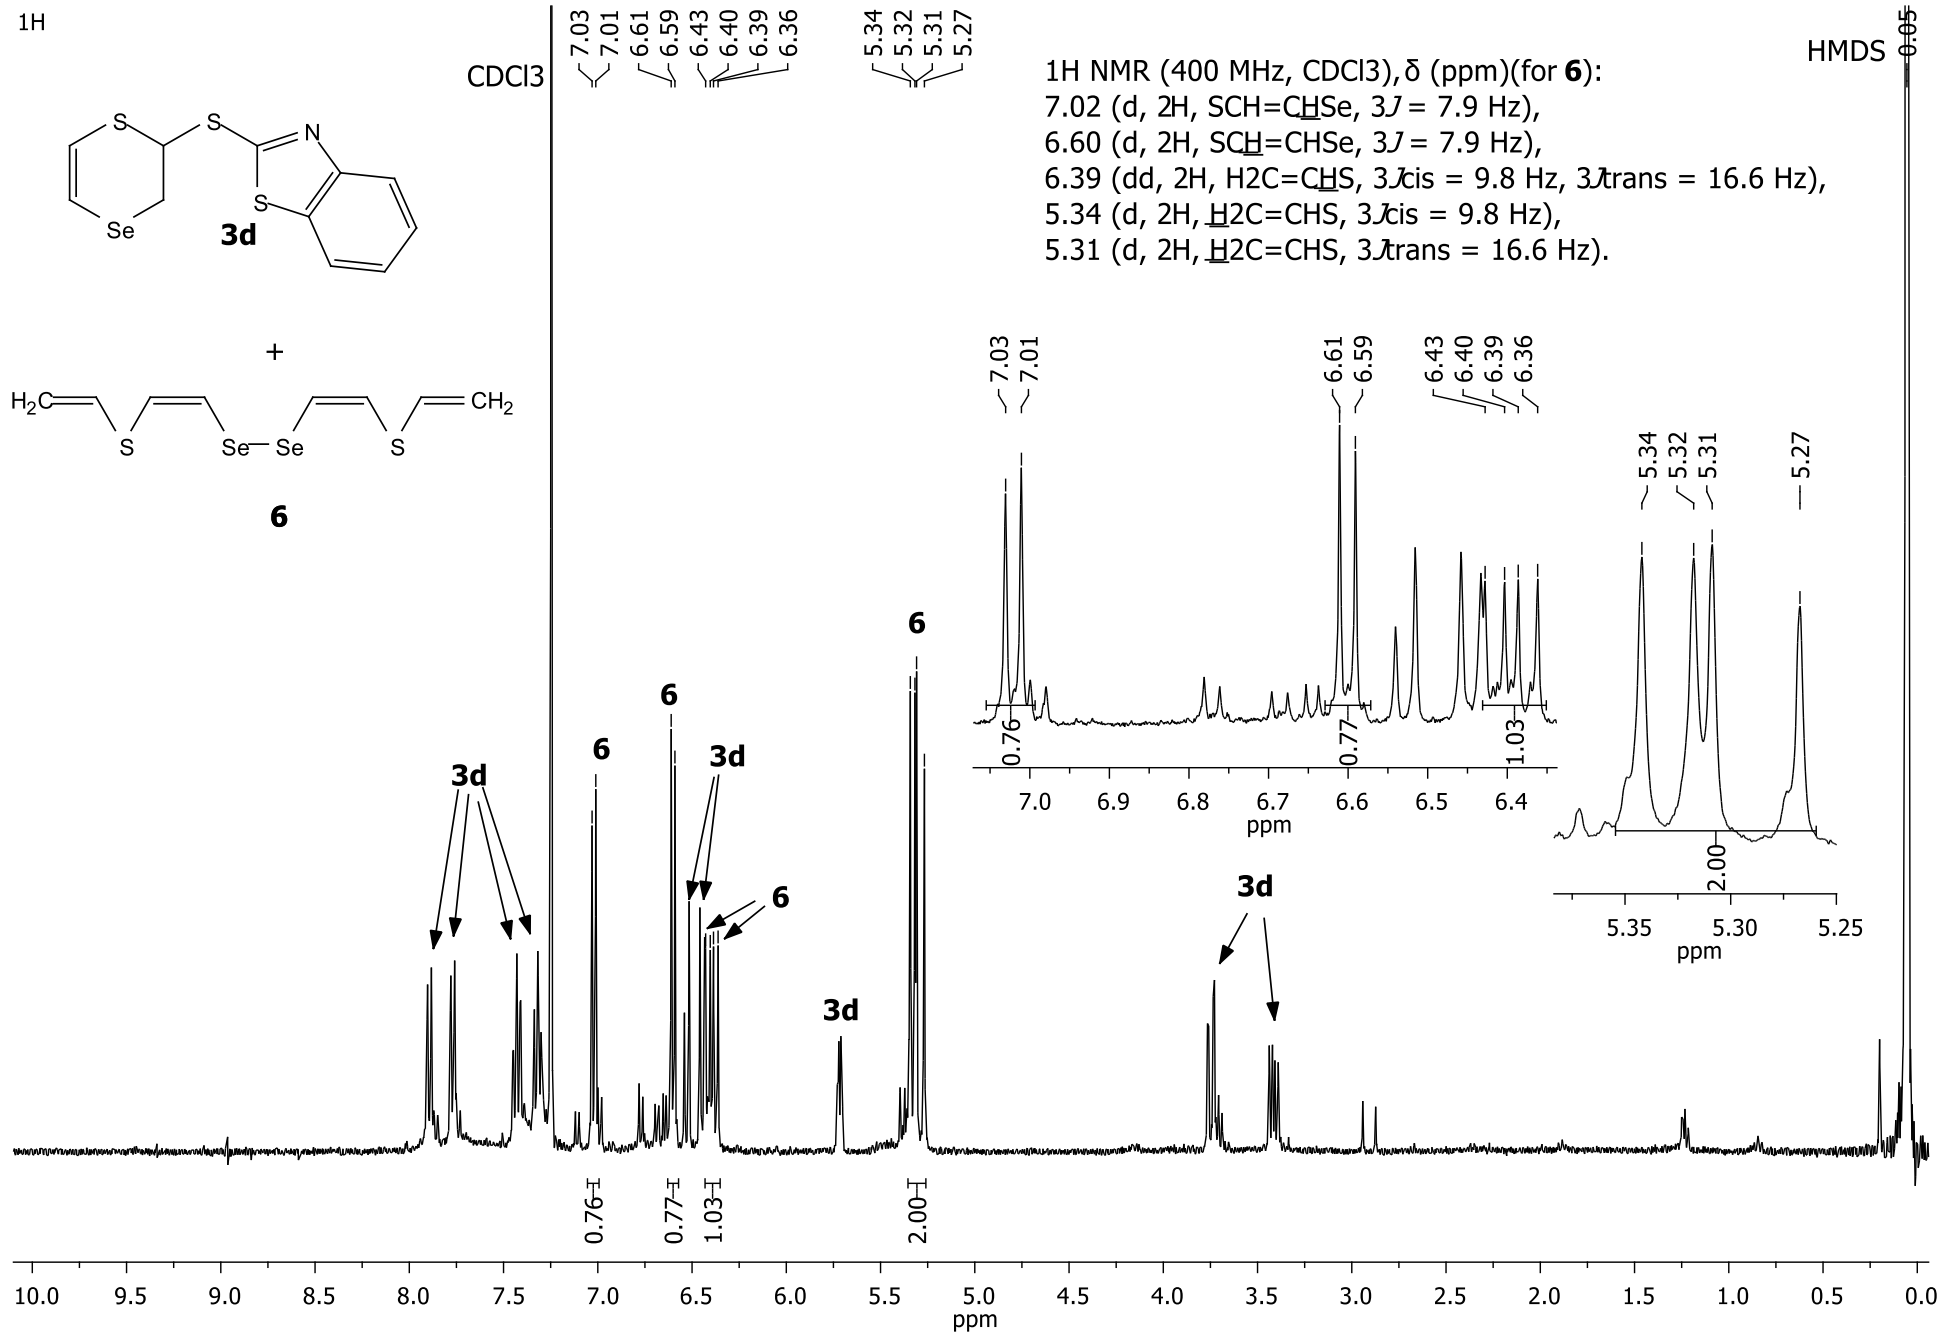

<sup>1</sup>H NMR spectrum of 1,2-bis[(Z)-2-(vinylsulfanyl)ethenyl]diselane (**6**) mixed with **3d**
